# Supplementary material for: Every Night and Every Morn: Effect of Variation in CLOCK Gene on Depression Depends on Exposure to Early and Recent Stress
Source: Front Psychiatry. 2021 Aug 26;12:687487. doi: 10.3389/fpsyt.2021.687487 (PMC8428175; doi:10.3389/fpsyt.2021.687487)
Supplement: Supplementary Table 4 — CLOCK SNPs in the NewMood database surviving quality control, in interaction with childhood adversities (CHA) on current depressive symptoms (BSI-DEP). Results of linear regression models and quality control steps are shown. SNPs in significant clumps are marked in red, top SNP of the clump is marked in bold red. Results for additive, dominant, and recessive models are shown. [file Table_4.xlsx]

## Sheet: additive
CHR	SNP	BP	A1	TEST	NMISS	BETA	SE	L95	U95	STAT	P	F_MISS	MAF	HWE
4	rs711533:56289379:C:A	56289379	C	ADDxCHS_LP	768	0.05309	0.01571	0.0223	0.08388	3.38	0.0007625	0.0012	0.1755	0.4717
4	rs530875:56289779:A:G	56289779	A	ADDxCHS_LP	768	0.05309	0.01571	0.0223	0.08388	3.38	0.0007625	0.0012	0.1755	0.4717
4	rs532768:56289999:A:G	56289999	A	ADDxCHS_LP	768	0.05309	0.01571	0.0223	0.08388	3.38	0.0007625	0.0012	0.1755	0.4717
4	rs534654	56290220	A	ADDxCHS_LP	768	0.05309	0.01571	0.0223	0.08388	3.38	0.0007625	0	0.1759	0.4048
4	rs471546:56286613:A:T	56286613	A	ADDxCHS_LP	767	0.05311	0.01572	0.0223	0.08392	3.379	0.0007655	0.002401	0.1757	0.4717
4	rs504836:56285305:C:T	56285305	C	ADDxCHS_LP	767	0.05311	0.01572	0.0223	0.08392	3.379	0.0007655	0.002401	0.1757	0.4717
4	rs549564:56286717:T:C	56286717	T	ADDxCHS_LP	767	0.05311	0.01572	0.0223	0.08392	3.379	0.0007655	0.002401	0.1757	0.4717
4	rs505861:56285166:T:G	56285166	T	ADDxCHS_LP	766	0.05291	0.01574	0.02205	0.08377	3.36	0.0008173	0.003601	0.1753	0.4713
4	rs142902983:56406335:C:T	56406335	T	ADDxCHS_LP	749	0.05245	0.01602	0.02105	0.08384	3.275	0.001108	0.02761	0.1716	0.538
4	rs6828454:56290496:C:T	56290496	C	ADDxCHS_LP	766	0.0341	0.01067	0.01319	0.05501	3.196	0.001452	0.003601	0.459	0.2636
4	rs6858684:56289778:C:T	56289778	C	ADDxCHS_LP	764	0.03379	0.01069	0.01285	0.05473	3.162	0.001627	0.006002	0.4589	0.2344
4	rs3749473:56294628:T:C	56294628	T	ADDxCHS_LP	765	0.03336	0.01062	0.01254	0.05417	3.141	0.001749	0.004802	0.4596	0.209
4	rs10049561:56292790:A:G	56292790	A	ADDxCHS_LP	767	0.03337	0.01066	0.01248	0.05425	3.131	0.001809	0.002401	0.4591	0.2946
4	rs11732723:56290558:C:T	56290558	C	ADDxCHS_LP	767	0.03318	0.01067	0.01228	0.05409	3.111	0.001934	0.002401	0.4597	0.236
4	rs6858749:56290437:T:C	56290437	T	ADDxCHS_LP	767	0.03318	0.01067	0.01228	0.05409	3.111	0.001934	0.002401	0.4597	0.236
4	rs6810483:56290573:T:C	56290573	T	ADDxCHS_LP	766	0.02511	0.01062	0.004293	0.04592	2.364	0.01832	0.003601	0.4982	0.2672
4	rs6840236:56289785:T:C	56289785	T	ADDxCHS_LP	764	0.02482	0.01063	0.003974	0.04566	2.334	0.01987	0.006002	0.4982	0.2379
4	rs3749472:56294032:A:G	56294032	A	ADDxCHS_LP	765	0.02425	0.01058	0.003523	0.04498	2.293	0.02212	0.004802	0.4982	0.2663
4	rs4864994:56318122:A:C	56318122	C	ADDxCHS_LP	762	-0.01891	0.01146	-0.04137	0.003543	-1.651	0.0992	0.008403	0.3596	0.1738
4	rs12651640:56320321:T:A	56320321	A	ADDxCHS_LP	767	-0.01851	0.01143	-0.04091	0.00389	-1.62	0.1057	0.0012	0.3582	0.1313
4	rs4864548	56413803	A	ADDxCHS_LP	768	-0.01844	0.0114	-0.04078	0.003904	-1.617	0.1062	0	0.3571	0.08248
4	rs1047354:56295583:A:G	56295583	G	ADDxCHS_LP	767	-0.0184	0.01143	-0.0408	0.004001	-1.61	0.1078	0.0012	0.3576	0.1517
4	rs10517346:56323194:G:C	56323194	C	ADDxCHS_LP	767	-0.0184	0.01143	-0.0408	0.004001	-1.61	0.1078	0.0012	0.3576	0.1517
4	rs1056545:56296897:G:A	56296897	A	ADDxCHS_LP	763	-0.01845	0.01146	-0.04092	0.004013	-1.61	0.1078	0.006002	0.3593	0.1743
4	rs1056547:56296763:T:G	56296763	G	ADDxCHS_LP	767	-0.0184	0.01143	-0.0408	0.004001	-1.61	0.1078	0.0012	0.3576	0.1517
4	rs11133378:56305639:C:T	56305639	T	ADDxCHS_LP	767	-0.0184	0.01143	-0.0408	0.004001	-1.61	0.1078	0.0012	0.3576	0.1517
4	rs11133380:56307277:A:G	56307277	G	ADDxCHS_LP	767	-0.0184	0.01143	-0.0408	0.004001	-1.61	0.1078	0.0012	0.3576	0.1517
4	rs11133381:56316979:T:C	56316979	C	ADDxCHS_LP	767	-0.0184	0.01143	-0.0408	0.004001	-1.61	0.1078	0.0012	0.3576	0.1517
4	rs11133384:56323253:C:G	56323253	G	ADDxCHS_LP	767	-0.0184	0.01143	-0.0408	0.004001	-1.61	0.1078	0.0012	0.3576	0.1517
4	rs11937487:56302743:A:G	56302743	G	ADDxCHS_LP	767	-0.0184	0.01143	-0.0408	0.004001	-1.61	0.1078	0.0012	0.3576	0.1517
4	rs11945370:56309042:A:G	56309042	G	ADDxCHS_LP	767	-0.0184	0.01143	-0.0408	0.004001	-1.61	0.1078	0.0012	0.3576	0.1517
4	rs12510110:56307734:A:G	56307734	G	ADDxCHS_LP	767	-0.0184	0.01143	-0.0408	0.004001	-1.61	0.1078	0.0012	0.3576	0.1517
4	rs12510990:56308074:T:C	56308074	C	ADDxCHS_LP	767	-0.0184	0.01143	-0.0408	0.004001	-1.61	0.1078	0.0012	0.3576	0.1517
4	rs12647677:56310420:T:C	56310420	C	ADDxCHS_LP	767	-0.0184	0.01143	-0.0408	0.004001	-1.61	0.1078	0.0012	0.3576	0.1517
4	rs1474271:56302079:C:T	56302079	T	ADDxCHS_LP	767	-0.0184	0.01143	-0.0408	0.004001	-1.61	0.1078	0.0012	0.3576	0.1517
4	rs1554483:56321817:C:G	56321817	G	ADDxCHS_LP	767	-0.0184	0.01143	-0.0408	0.004001	-1.61	0.1078	0.0012	0.3576	0.1517
4	rs1554484:56324339:T:C	56324339	C	ADDxCHS_LP	767	-0.0184	0.01143	-0.0408	0.004001	-1.61	0.1078	0.0012	0.3576	0.1517
4	rs3749474:56300685:C:T	56300685	T	ADDxCHS_LP	767	-0.0184	0.01143	-0.0408	0.004001	-1.61	0.1078	0.0012	0.3576	0.1517
4	rs3805146:56303152:C:T	56303152	T	ADDxCHS_LP	767	-0.0184	0.01143	-0.0408	0.004001	-1.61	0.1078	0.0012	0.3576	0.1517
4	rs3805148:56306810:A:C	56306810	C	ADDxCHS_LP	767	-0.0184	0.01143	-0.0408	0.004001	-1.61	0.1078	0.0012	0.3576	0.1517
4	rs3805149:56308351:C:T	56308351	T	ADDxCHS_LP	767	-0.0184	0.01143	-0.0408	0.004001	-1.61	0.1078	0.0012	0.3576	0.1517
4	rs3805150:56313036:C:T	56313036	T	ADDxCHS_LP	767	-0.0184	0.01143	-0.0408	0.004001	-1.61	0.1078	0.0012	0.3576	0.1517
4	rs4864990:56313690:A:G	56313690	G	ADDxCHS_LP	767	-0.0184	0.01143	-0.0408	0.004001	-1.61	0.1078	0.0012	0.3576	0.1517
4	rs4864995:56319020:A:G	56319020	G	ADDxCHS_LP	767	-0.0184	0.01143	-0.0408	0.004001	-1.61	0.1078	0.0012	0.3576	0.1517
4	rs5863:56296907:A:G	56296907	G	ADDxCHS_LP	763	-0.01845	0.01146	-0.04092	0.004013	-1.61	0.1078	0.006002	0.3593	0.1743
4	rs6828570:56297762:C:G	56297762	G	ADDxCHS_LP	767	-0.0184	0.01143	-0.0408	0.004001	-1.61	0.1078	0.0012	0.3576	0.1517
4	rs7677952:56291479:C:T	56291479	T	ADDxCHS_LP	767	-0.0184	0.01143	-0.0408	0.004001	-1.61	0.1078	0.0012	0.3576	0.1517
4	rs11932293:56420192:G:C	56420192	C	ADDxCHS_LP	768	-0.01823	0.0114	-0.04058	0.004121	-1.599	0.1103	0	0.3571	0.1129
4	rs11934897:56419563:T:C	56419563	C	ADDxCHS_LP	768	-0.01823	0.0114	-0.04058	0.004121	-1.599	0.1103	0	0.3571	0.1129
4	rs12505266:56412169:C:T	56412169	T	ADDxCHS_LP	768	-0.01823	0.0114	-0.04058	0.004121	-1.599	0.1103	0	0.3571	0.1129
4	rs13115828:56417614:T:C	56417614	C	ADDxCHS_LP	768	-0.01823	0.0114	-0.04058	0.004121	-1.599	0.1103	0	0.3571	0.1129
4	rs13118520:56415283:G:C	56415283	C	ADDxCHS_LP	768	-0.01823	0.0114	-0.04058	0.004121	-1.599	0.1103	0	0.3571	0.1129
4	rs13136282:56418012:C:G	56418012	G	ADDxCHS_LP	768	-0.01823	0.0114	-0.04058	0.004121	-1.599	0.1103	0	0.3571	0.1129
4	rs4864549:56420547:G:T	56420547	T	ADDxCHS_LP	768	-0.01823	0.0114	-0.04058	0.004121	-1.599	0.1103	0	0.3571	0.1129
4	rs4865011:56420623:A:G	56420623	G	ADDxCHS_LP	768	-0.01823	0.0114	-0.04058	0.004121	-1.599	0.1103	0	0.3571	0.1129
4	rs56154935:56412545:C:G	56412545	G	ADDxCHS_LP	768	-0.01823	0.0114	-0.04058	0.004121	-1.599	0.1103	0	0.3571	0.1129
4	rs7662966:56414428:G:C	56414428	C	ADDxCHS_LP	768	-0.01823	0.0114	-0.04058	0.004121	-1.599	0.1103	0	0.3571	0.1129
4	rs7691799:56411741:C:A	56411741	A	ADDxCHS_LP	768	-0.01823	0.0114	-0.04058	0.004121	-1.599	0.1103	0	0.3571	0.1129
4	rs11942279:56305819:T:C	56305819	C	ADDxCHS_LP	766	-0.01828	0.01144	-0.04071	0.004147	-1.598	0.1106	0.002401	0.358	0.152
4	rs11932880:56398077:C:A	56398077	A	ADDxCHS_LP	767	-0.01812	0.01142	-0.0405	0.004265	-1.586	0.113	0.002401	0.3562	0.1509
4	rs11133396:56390413:A:C	56390413	C	ADDxCHS_LP	767	-0.01798	0.01142	-0.04036	0.004392	-1.575	0.1156	0.002401	0.3568	0.1305
4	rs11726198:56390002:T:C	56390002	C	ADDxCHS_LP	767	-0.01798	0.01142	-0.04036	0.004392	-1.575	0.1156	0.002401	0.3568	0.1305
4	rs12507722:56402588:G:A	56402588	A	ADDxCHS_LP	767	-0.01798	0.01142	-0.04036	0.004392	-1.575	0.1156	0.002401	0.3568	0.1305
4	rs13106406:56408486:G:C	56408486	C	ADDxCHS_LP	767	-0.01798	0.01142	-0.04036	0.004392	-1.575	0.1156	0.002401	0.3568	0.1305
4	rs13108499:56392681:A:C	56392681	C	ADDxCHS_LP	767	-0.01798	0.01142	-0.04036	0.004392	-1.575	0.1156	0.002401	0.3568	0.1305
4	rs13113518:56399648:T:C	56399648	C	ADDxCHS_LP	767	-0.01798	0.01142	-0.04036	0.004392	-1.575	0.1156	0.002401	0.3568	0.1305
4	rs13116194:56397317:G:A	56397317	A	ADDxCHS_LP	767	-0.01798	0.01142	-0.04036	0.004392	-1.575	0.1156	0.002401	0.3568	0.1305
4	rs13117836:56397385:C:T	56397385	T	ADDxCHS_LP	767	-0.01798	0.01142	-0.04036	0.004392	-1.575	0.1156	0.002401	0.3568	0.1305
4	rs13132084:56399912:G:A	56399912	A	ADDxCHS_LP	767	-0.01798	0.01142	-0.04036	0.004392	-1.575	0.1156	0.002401	0.3568	0.1305
4	rs13134752:56408511:A:T	56408511	T	ADDxCHS_LP	767	-0.01798	0.01142	-0.04036	0.004392	-1.575	0.1156	0.002401	0.3568	0.1305
4	rs13141049:56401656:T:C	56401656	C	ADDxCHS_LP	767	-0.01798	0.01142	-0.04036	0.004392	-1.575	0.1156	0.002401	0.3568	0.1305
4	rs13152173:56400955:G:T	56400955	T	ADDxCHS_LP	767	-0.01798	0.01142	-0.04036	0.004392	-1.575	0.1156	0.002401	0.3568	0.1305
4	rs34648901:56407426:C:T	56407426	T	ADDxCHS_LP	767	-0.01798	0.01142	-0.04036	0.004392	-1.575	0.1156	0.002401	0.3568	0.1305
4	rs4864546:56404127:G:A	56404127	A	ADDxCHS_LP	767	-0.01798	0.01142	-0.04036	0.004392	-1.575	0.1156	0.002401	0.3568	0.1305
4	rs4865007:56403717:C:T	56403717	T	ADDxCHS_LP	767	-0.01798	0.01142	-0.04036	0.004392	-1.575	0.1156	0.002401	0.3568	0.1305
4	rs7660980:56409115:C:A	56409115	A	ADDxCHS_LP	767	-0.01798	0.01142	-0.04036	0.004392	-1.575	0.1156	0.0012	0.3576	0.1131
4	rs7668429:56397978:G:A	56397978	A	ADDxCHS_LP	767	-0.01798	0.01142	-0.04036	0.004392	-1.575	0.1156	0.002401	0.3568	0.1305
4	rs7669635:56397820:C:T	56397820	T	ADDxCHS_LP	767	-0.01798	0.01142	-0.04036	0.004392	-1.575	0.1156	0.002401	0.3568	0.1305
4	rs7675109:56391756:G:A	56391756	A	ADDxCHS_LP	767	-0.01798	0.01142	-0.04036	0.004392	-1.575	0.1156	0.002401	0.3568	0.1305
4	rs7686058:56405164:C:T	56405164	T	ADDxCHS_LP	767	-0.01798	0.01142	-0.04036	0.004392	-1.575	0.1156	0.002401	0.3568	0.1305
4	rs7696832:56403247:A:G	56403247	G	ADDxCHS_LP	767	-0.01798	0.01142	-0.04036	0.004392	-1.575	0.1156	0.002401	0.3568	0.1305
4	rs12642716:56346163:G:A	56346163	A	ADDxCHS_LP	767	-0.01797	0.01142	-0.04035	0.004403	-1.574	0.1158	0.002401	0.3574	0.1511
4	rs12506788:56343593:C:T	56343593	T	ADDxCHS_LP	766	-0.01797	0.01142	-0.04036	0.004411	-1.574	0.116	0.004802	0.3577	0.1311
4	rs13114841:56352141:T:C	56352141	C	ADDxCHS_LP	767	-0.01793	0.01143	-0.04032	0.004464	-1.569	0.117	0.002401	0.3574	0.1511
4	rs4865005:56391948:T:A	56391948	A	ADDxCHS_LP	766	-0.01791	0.01143	-0.0403	0.004489	-1.567	0.1175	0.003601	0.3572	0.1307
4	rs10462032:56345236:T:C	56345236	C	ADDxCHS_LP	768	-0.01787	0.01141	-0.04023	0.004495	-1.566	0.1177	0.0012	0.357	0.1314
4	rs10517344:56343712:A:C	56343712	C	ADDxCHS_LP	768	-0.01787	0.01141	-0.04023	0.004495	-1.566	0.1177	0.0012	0.357	0.1314
4	rs11133386:56327487:A:T	56327487	T	ADDxCHS_LP	768	-0.01787	0.01141	-0.04023	0.004495	-1.566	0.1177	0.0012	0.357	0.1314
4	rs11133387:56341297:C:G	56341297	G	ADDxCHS_LP	768	-0.01787	0.01141	-0.04023	0.004495	-1.566	0.1177	0.0012	0.357	0.1314
4	rs11133388:56344033:G:C	56344033	C	ADDxCHS_LP	768	-0.01787	0.01141	-0.04023	0.004495	-1.566	0.1177	0.0012	0.357	0.1314
4	rs11133390:56367893:A:G	56367893	G	ADDxCHS_LP	768	-0.01787	0.01141	-0.04023	0.004495	-1.566	0.1177	0.0012	0.357	0.1314
4	rs11133391:56367955:T:C	56367955	C	ADDxCHS_LP	768	-0.01787	0.01141	-0.04023	0.004495	-1.566	0.1177	0.0012	0.357	0.1314
4	rs11133392:56373896:T:A	56373896	A	ADDxCHS_LP	768	-0.01787	0.01141	-0.04023	0.004495	-1.566	0.1177	0.0012	0.357	0.1314
4	rs11133395:56383651:C:T	56383651	T	ADDxCHS_LP	768	-0.01787	0.01141	-0.04023	0.004495	-1.566	0.1177	0.0012	0.357	0.1314
4	rs11722049:56346901:A:G	56346901	G	ADDxCHS_LP	768	-0.01787	0.01141	-0.04023	0.004495	-1.566	0.1177	0.0012	0.357	0.1314
4	rs11724094:56367646:C:A	56367646	A	ADDxCHS_LP	768	-0.01787	0.01141	-0.04023	0.004495	-1.566	0.1177	0.0012	0.357	0.1314
4	rs11729220:56367796:T:G	56367796	G	ADDxCHS_LP	768	-0.01787	0.01141	-0.04023	0.004495	-1.566	0.1177	0.0012	0.357	0.1314
4	rs12500162:56363100:T:C	56363100	C	ADDxCHS_LP	768	-0.01787	0.01141	-0.04023	0.004495	-1.566	0.1177	0.0012	0.357	0.1314
4	rs12501327:56373415:C:G	56373415	G	ADDxCHS_LP	768	-0.01787	0.01141	-0.04023	0.004495	-1.566	0.1177	0.0012	0.357	0.1314
4	rs12501636:56348484:T:A	56348484	A	ADDxCHS_LP	768	-0.01787	0.01141	-0.04023	0.004495	-1.566	0.1177	0.0012	0.357	0.1314
4	rs12503578:56375534:C:G	56375534	G	ADDxCHS_LP	768	-0.01787	0.01141	-0.04023	0.004495	-1.566	0.1177	0.0012	0.357	0.1314
4	rs12510681:56362904:C:T	56362904	T	ADDxCHS_LP	768	-0.01787	0.01141	-0.04023	0.004495	-1.566	0.1177	0.0012	0.357	0.1314
4	rs12644948:56336433:C:T	56336433	T	ADDxCHS_LP	768	-0.01787	0.01141	-0.04023	0.004495	-1.566	0.1177	0.0012	0.357	0.1314
4	rs13107988:56351378:T:C	56351378	C	ADDxCHS_LP	768	-0.01787	0.01141	-0.04023	0.004495	-1.566	0.1177	0.0012	0.357	0.1314
4	rs13108409:56386445:T:C	56386445	C	ADDxCHS_LP	768	-0.01787	0.01141	-0.04023	0.004495	-1.566	0.1177	0.0012	0.357	0.1314
4	rs13118237:56340426:T:G	56340426	G	ADDxCHS_LP	768	-0.01787	0.01141	-0.04023	0.004495	-1.566	0.1177	0.0012	0.357	0.1314
4	rs13122619:56345506:C:G	56345506	G	ADDxCHS_LP	768	-0.01787	0.01141	-0.04023	0.004495	-1.566	0.1177	0.0012	0.357	0.1314
4	rs13127906:56370368:A:G	56370368	G	ADDxCHS_LP	768	-0.01787	0.01141	-0.04023	0.004495	-1.566	0.1177	0.0012	0.357	0.1314
4	rs13133484:56370343:T:C	56370343	C	ADDxCHS_LP	768	-0.01787	0.01141	-0.04023	0.004495	-1.566	0.1177	0.0012	0.357	0.1314
4	rs13133579:56326088:A:T	56326088	T	ADDxCHS_LP	768	-0.01787	0.01141	-0.04023	0.004495	-1.566	0.1177	0.0012	0.357	0.1314
4	rs13146987:56357795:A:G	56357795	G	ADDxCHS_LP	768	-0.01787	0.01141	-0.04023	0.004495	-1.566	0.1177	0.0012	0.357	0.1314
4	rs1522112:56329773:T:C	56329773	C	ADDxCHS_LP	768	-0.01787	0.01141	-0.04023	0.004495	-1.566	0.1177	0.0012	0.357	0.1314
4	rs3805151:56337041:T:C	56337041	C	ADDxCHS_LP	768	-0.01787	0.01141	-0.04023	0.004495	-1.566	0.1177	0.0012	0.357	0.1314
4	rs3805155:56364009:T:C	56364009	C	ADDxCHS_LP	768	-0.01787	0.01141	-0.04023	0.004495	-1.566	0.1177	0.0012	0.357	0.1314
4	rs3828480:56376519:T:C	56376519	C	ADDxCHS_LP	768	-0.01787	0.01141	-0.04023	0.004495	-1.566	0.1177	0.0012	0.357	0.1314
4	rs3828482:56376691:G:T	56376691	T	ADDxCHS_LP	768	-0.01787	0.01141	-0.04023	0.004495	-1.566	0.1177	0.0012	0.357	0.1314
4	rs4340844:56328856:A:C	56328856	C	ADDxCHS_LP	768	-0.01787	0.01141	-0.04023	0.004495	-1.566	0.1177	0.0012	0.357	0.1314
4	rs4864542:56354087:C:G	56354087	G	ADDxCHS_LP	768	-0.01787	0.01141	-0.04023	0.004495	-1.566	0.1177	0.0012	0.357	0.1314
4	rs4864544:56381459:C:T	56381459	T	ADDxCHS_LP	768	-0.01787	0.01141	-0.04023	0.004495	-1.566	0.1177	0.0012	0.357	0.1314
4	rs4864545:56381830:G:A	56381830	A	ADDxCHS_LP	768	-0.01787	0.01141	-0.04023	0.004495	-1.566	0.1177	0.0012	0.357	0.1314
4	rs4864997:56332177:C:G	56332177	G	ADDxCHS_LP	768	-0.01787	0.01141	-0.04023	0.004495	-1.566	0.1177	0.0012	0.357	0.1314
4	rs4864999:56342903:A:G	56342903	G	ADDxCHS_LP	768	-0.01787	0.01141	-0.04023	0.004495	-1.566	0.1177	0.0012	0.357	0.1314
4	rs6822740:56385089:C:G	56385089	G	ADDxCHS_LP	768	-0.01787	0.01141	-0.04023	0.004495	-1.566	0.1177	0.0012	0.357	0.1314
4	rs6838305:56374754:C:T	56374754	T	ADDxCHS_LP	768	-0.01787	0.01141	-0.04023	0.004495	-1.566	0.1177	0.0012	0.357	0.1314
4	rs6838499:56374828:C:T	56374828	T	ADDxCHS_LP	768	-0.01787	0.01141	-0.04023	0.004495	-1.566	0.1177	0.0012	0.357	0.1314
4	rs6838882:56355477:A:G	56355477	G	ADDxCHS_LP	768	-0.01787	0.01141	-0.04023	0.004495	-1.566	0.1177	0.0012	0.357	0.1314
4	rs6847529:56384943:A:T	56384943	T	ADDxCHS_LP	768	-0.01787	0.01141	-0.04023	0.004495	-1.566	0.1177	0.0012	0.357	0.1314
4	rs6849433:56372665:A:G	56372665	G	ADDxCHS_LP	768	-0.01787	0.01141	-0.04023	0.004495	-1.566	0.1177	0.0012	0.357	0.1314
4	rs6858803:56350701:T:C	56350701	C	ADDxCHS_LP	768	-0.01787	0.01141	-0.04023	0.004495	-1.566	0.1177	0.0012	0.357	0.1314
4	rs7677085:56361968:C:T	56361968	T	ADDxCHS_LP	768	-0.01787	0.01141	-0.04023	0.004495	-1.566	0.1177	0.0012	0.357	0.1314
4	rs7686261:56366391:A:G	56366391	G	ADDxCHS_LP	768	-0.01787	0.01141	-0.04023	0.004495	-1.566	0.1177	0.0012	0.357	0.1314
4	rs9312661:56342326:G:A	56342326	A	ADDxCHS_LP	768	-0.01787	0.01141	-0.04023	0.004495	-1.566	0.1177	0.0012	0.357	0.1314
4	rs939823:56353535:C:T	56353535	T	ADDxCHS_LP	768	-0.01787	0.01141	-0.04023	0.004495	-1.566	0.1177	0.0012	0.357	0.1314
4	rs960152:56333475:A:C	56333475	C	ADDxCHS_LP	768	-0.01787	0.01141	-0.04023	0.004495	-1.566	0.1177	0.0012	0.357	0.1314
4	rs11133397:56400333:C:A	56400333	A	ADDxCHS_LP	765	-0.0179	0.01144	-0.04032	0.004532	-1.564	0.1183	0.004802	0.3565	0.1503
4	rs11133398:56400347:C:T	56400347	T	ADDxCHS_LP	765	-0.0179	0.01144	-0.04032	0.004532	-1.564	0.1183	0.004802	0.3565	0.1503
4	rs4865004:56381285:G:A	56381285	A	ADDxCHS_LP	767	-0.01746	0.01139	-0.03978	0.004864	-1.533	0.1257	0.002401	0.3592	0.1133
4	rs4864547:56404395:C:T	56404395	T	ADDxCHS_LP	765	-0.01747	0.01142	-0.03986	0.004914	-1.53	0.1265	0.004802	0.3577	0.1311
4	rs3762837:56377365:T:C	56377365	C	ADDxCHS_LP	767	-0.01743	0.01142	-0.03982	0.004961	-1.526	0.1275	0.002401	0.3562	0.1509
4	rs1464490:56322787:T:C	56322787	C	ADDxCHS_LP	766	-0.01601	0.01143	-0.03841	0.006385	-1.401	0.1616	0.002401	0.358	0.152
4	rs55699500:56407079:G:T	56407079	T	ADDxCHS_LP	762	-0.01483	0.01172	-0.0378	0.008139	-1.266	0.2061	0.008403	0.3529	0.2229
4	rs56362210:56407139:C:T	56407139	T	ADDxCHS_LP	762	-0.01483	0.01172	-0.0378	0.008139	-1.266	0.2061	0.008403	0.3529	0.2229
4	rs11133394:56383238:C:T	56383238	C	ADDxCHS_LP	732	0.01394	0.01126	-0.008123	0.036	1.238	0.216	0.04682	0.4181	0.08
4	rs6850524:56381997:C:G	56381997	C	ADDxCHS_LP	732	0.01394	0.01126	-0.008123	0.036	1.238	0.216	0.04682	0.4181	0.08
4	rs6825994:56390411:C:A	56390411	A	ADDxCHS_LP	751	0.01295	0.01154	-0.009669	0.03557	1.122	0.2622	0.02041	0.3585	0.01482
4	rs7659095:56401601:G:A	56401601	G	ADDxCHS_LP	766	0.01377	0.01248	-0.01069	0.03824	1.104	0.2701	0.003601	0.2837	0.393
4	rs17722979:56346411:G:A	56346411	A	ADDxCHS_LP	767	0.01347	0.01246	-0.01096	0.03789	1.081	0.2802	0.002401	0.2846	0.4431
4	rs62309758:56423069:T:C	56423069	C	ADDxCHS_LP	755	0.0136	0.01261	-0.01111	0.03831	1.079	0.2811	0.01681	0.2729	0.2181
4	rs62305265:56369641:G:A	56369641	A	ADDxCHS_LP	767	0.01318	0.01244	-0.01121	0.03757	1.059	0.29	0.002401	0.284	0.3942
4	rs79658500:56364754:T:C	56364754	C	ADDxCHS_LP	766	0.01313	0.01246	-0.0113	0.03756	1.053	0.2925	0.003601	0.2843	0.3947
4	rs67963898:56341687:A:G	56341687	G	ADDxCHS_LP	767	0.01284	0.01246	-0.01157	0.03726	1.031	0.3029	0.002401	0.284	0.3942
4	rs1021306:56395944:T:G	56395944	T	ADDxCHS_LP	768	0.01273	0.01245	-0.01167	0.03714	1.023	0.3068	0.0012	0.2843	0.443
4	rs1021307:56395714:G:A	56395714	G	ADDxCHS_LP	768	0.01273	0.01245	-0.01167	0.03714	1.023	0.3068	0.0012	0.2843	0.443
4	rs10462033:56377719:G:T	56377719	T	ADDxCHS_LP	768	0.01273	0.01245	-0.01167	0.03714	1.023	0.3068	0.0012	0.2843	0.443
4	rs1048004:56300209:C:A	56300209	A	ADDxCHS_LP	768	0.01273	0.01245	-0.01167	0.03714	1.023	0.3068	0	0.2845	0.4439
4	rs10866424:56419574:T:G	56419574	T	ADDxCHS_LP	768	0.01273	0.01245	-0.01167	0.03714	1.023	0.3068	0	0.2839	0.3954
4	rs11240:56319350:C:G	56319350	G	ADDxCHS_LP	768	0.01273	0.01245	-0.01167	0.03714	1.023	0.3068	0	0.2845	0.4439
4	rs12505265:56412143:C:G	56412143	C	ADDxCHS_LP	768	0.01273	0.01245	-0.01167	0.03714	1.023	0.3068	0	0.2839	0.3954
4	rs12509047:56411412:T:A	56411412	T	ADDxCHS_LP	768	0.01273	0.01245	-0.01167	0.03714	1.023	0.3068	0	0.2839	0.3954
4	rs13134079:56408188:A:G	56408188	A	ADDxCHS_LP	768	0.01273	0.01245	-0.01167	0.03714	1.023	0.3068	0.0012	0.2843	0.443
4	rs1522109:56380570:A:G	56380570	G	ADDxCHS_LP	768	0.01273	0.01245	-0.01167	0.03714	1.023	0.3068	0.0012	0.2843	0.443
4	rs1546004:56387779:C:T	56387779	C	ADDxCHS_LP	768	0.01273	0.01245	-0.01167	0.03714	1.023	0.3068	0.0012	0.2843	0.443
4	rs17721215:56303787:T:C	56303787	C	ADDxCHS_LP	768	0.01273	0.01245	-0.01167	0.03714	1.023	0.3068	0	0.2845	0.4439
4	rs17722870:56344686:A:G	56344686	G	ADDxCHS_LP	768	0.01273	0.01245	-0.01167	0.03714	1.023	0.3068	0.0012	0.2843	0.443
4	rs17779627:56349942:T:C	56349942	C	ADDxCHS_LP	768	0.01273	0.01245	-0.01167	0.03714	1.023	0.3068	0.0012	0.2843	0.443
4	rs1801260	56301369	G	ADDxCHS_LP	768	0.01273	0.01245	-0.01167	0.03714	1.023	0.3068	0	0.2845	0.4439
4	rs1906676:56415344:A:G	56415344	A	ADDxCHS_LP	768	0.01273	0.01245	-0.01167	0.03714	1.023	0.3068	0	0.2839	0.3954
4	rs1915905:56378548:T:G	56378548	G	ADDxCHS_LP	768	0.01273	0.01245	-0.01167	0.03714	1.023	0.3068	0.0012	0.2843	0.443
4	rs1979604:56418755:A:C	56418755	A	ADDxCHS_LP	768	0.01273	0.01245	-0.01167	0.03714	1.023	0.3068	0	0.2839	0.3954
4	rs2070062:56355598:A:C	56355598	C	ADDxCHS_LP	768	0.01273	0.01245	-0.01167	0.03714	1.023	0.3068	0.0012	0.2843	0.443
4	rs3805156:56364092:G:A	56364092	A	ADDxCHS_LP	768	0.01273	0.01245	-0.01167	0.03714	1.023	0.3068	0.0012	0.2843	0.443
4	rs4865006:56392279:C:T	56392279	C	ADDxCHS_LP	768	0.01273	0.01245	-0.01167	0.03714	1.023	0.3068	0.0012	0.2843	0.443
4	rs4865012:56420786:C:T	56420786	C	ADDxCHS_LP	768	0.01273	0.01245	-0.01167	0.03714	1.023	0.3068	0	0.2839	0.3954
4	rs55729020:56357848:C:G	56357848	G	ADDxCHS_LP	768	0.01273	0.01245	-0.01167	0.03714	1.023	0.3068	0.0012	0.2843	0.443
4	rs55885973:56346221:C:A	56346221	A	ADDxCHS_LP	768	0.01273	0.01245	-0.01167	0.03714	1.023	0.3068	0.0012	0.2843	0.443
4	rs56196624:56366507:T:C	56366507	C	ADDxCHS_LP	768	0.01273	0.01245	-0.01167	0.03714	1.023	0.3068	0.0012	0.2843	0.443
4	rs57338268:56351180:G:A	56351180	A	ADDxCHS_LP	768	0.01273	0.01245	-0.01167	0.03714	1.023	0.3068	0.0012	0.2843	0.443
4	rs58476959:56362401:A:C	56362401	C	ADDxCHS_LP	768	0.01273	0.01245	-0.01167	0.03714	1.023	0.3068	0.0012	0.2843	0.443
4	rs62303686:56293659:G:A	56293659	A	ADDxCHS_LP	768	0.01273	0.01245	-0.01167	0.03714	1.023	0.3068	0	0.2845	0.4439
4	rs62303711:56324492:G:C	56324492	C	ADDxCHS_LP	768	0.01273	0.01245	-0.01167	0.03714	1.023	0.3068	0	0.2845	0.4439
4	rs62303713:56327743:G:A	56327743	A	ADDxCHS_LP	768	0.01273	0.01245	-0.01167	0.03714	1.023	0.3068	0.0012	0.2843	0.443
4	rs62303718:56342937:T:C	56342937	C	ADDxCHS_LP	768	0.01273	0.01245	-0.01167	0.03714	1.023	0.3068	0.0012	0.2843	0.443
4	rs62303726:56356582:A:G	56356582	G	ADDxCHS_LP	768	0.01273	0.01245	-0.01167	0.03714	1.023	0.3068	0.0012	0.2843	0.443
4	rs62303731:56365834:C:T	56365834	T	ADDxCHS_LP	768	0.01273	0.01245	-0.01167	0.03714	1.023	0.3068	0.0012	0.2843	0.443
4	rs62303732:56366035:A:G	56366035	G	ADDxCHS_LP	768	0.01273	0.01245	-0.01167	0.03714	1.023	0.3068	0.0012	0.2843	0.443
4	rs62305264:56369135:A:G	56369135	G	ADDxCHS_LP	768	0.01273	0.01245	-0.01167	0.03714	1.023	0.3068	0.0012	0.2843	0.443
4	rs62305266:56371283:C:T	56371283	T	ADDxCHS_LP	768	0.01273	0.01245	-0.01167	0.03714	1.023	0.3068	0.0012	0.2843	0.443
4	rs62305267:56372979:C:T	56372979	T	ADDxCHS_LP	768	0.01273	0.01245	-0.01167	0.03714	1.023	0.3068	0.0012	0.2843	0.443
4	rs62305268:56373158:T:A	56373158	A	ADDxCHS_LP	768	0.01273	0.01245	-0.01167	0.03714	1.023	0.3068	0.0012	0.2843	0.443
4	rs62305270:56374009:G:C	56374009	C	ADDxCHS_LP	768	0.01273	0.01245	-0.01167	0.03714	1.023	0.3068	0.0012	0.2843	0.443
4	rs62305271:56375882:G:T	56375882	T	ADDxCHS_LP	768	0.01273	0.01245	-0.01167	0.03714	1.023	0.3068	0.0012	0.2843	0.443
4	rs6554282:56385979:A:G	56385979	A	ADDxCHS_LP	768	0.01273	0.01245	-0.01167	0.03714	1.023	0.3068	0.0012	0.2843	0.443
4	rs6554283:56387220:G:T	56387220	G	ADDxCHS_LP	768	0.01273	0.01245	-0.01167	0.03714	1.023	0.3068	0.0012	0.2843	0.443
4	rs6554284:56399899:A:G	56399899	A	ADDxCHS_LP	768	0.01273	0.01245	-0.01167	0.03714	1.023	0.3068	0.0012	0.2843	0.443
4	rs6554285:56400120:C:T	56400120	C	ADDxCHS_LP	768	0.01273	0.01245	-0.01167	0.03714	1.023	0.3068	0.0012	0.2843	0.443
4	rs6554287:56416879:C:T	56416879	C	ADDxCHS_LP	768	0.01273	0.01245	-0.01167	0.03714	1.023	0.3068	0	0.2839	0.3954
4	rs73236142:56312310:G:T	56312310	T	ADDxCHS_LP	768	0.01273	0.01245	-0.01167	0.03714	1.023	0.3068	0	0.2845	0.4439
4	rs7660668:56401697:C:G	56401697	C	ADDxCHS_LP	768	0.01273	0.01245	-0.01167	0.03714	1.023	0.3068	0.0012	0.2843	0.443
4	rs7666895:56387478:T:C	56387478	T	ADDxCHS_LP	768	0.01273	0.01245	-0.01167	0.03714	1.023	0.3068	0.0012	0.2843	0.443
4	rs7676245:56321317:G:A	56321317	A	ADDxCHS_LP	768	0.01273	0.01245	-0.01167	0.03714	1.023	0.3068	0	0.2845	0.4439
4	rs7681414:56375057:C:G	56375057	G	ADDxCHS_LP	768	0.01273	0.01245	-0.01167	0.03714	1.023	0.3068	0.0012	0.2843	0.443
4	rs7697067:56403380:A:T	56403380	A	ADDxCHS_LP	768	0.01273	0.01245	-0.01167	0.03714	1.023	0.3068	0.0012	0.2843	0.443
4	rs7698022:56407347:G:T	56407347	G	ADDxCHS_LP	768	0.01273	0.01245	-0.01167	0.03714	1.023	0.3068	0.0012	0.2843	0.443
4	rs1979605:56418873:A:G	56418873	A	ADDxCHS_LP	767	0.0127	0.01246	-0.01172	0.03711	1.019	0.3084	0.0012	0.2837	0.3938
4	rs56056791:56328468:T:C	56328468	C	ADDxCHS_LP	767	0.01261	0.01246	-0.01181	0.03704	1.012	0.3117	0.002401	0.284	0.3942
4	rs62303691:56308252:C:T	56308252	T	ADDxCHS_LP	766	0.01259	0.01247	-0.01185	0.03703	1.01	0.3128	0.002401	0.284	0.3942
4	rs62303692:56311447:C:T	56311447	T	ADDxCHS_LP	766	0.01259	0.01247	-0.01185	0.03703	1.01	0.3128	0.002401	0.284	0.3942
4	rs62303708:56313484:T:C	56313484	C	ADDxCHS_LP	766	0.01259	0.01247	-0.01185	0.03703	1.01	0.3128	0.002401	0.284	0.3942
4	rs62303712:56326651:C:T	56326651	T	ADDxCHS_LP	766	0.01259	0.01247	-0.01185	0.03703	1.01	0.3128	0.003601	0.2837	0.393
4	rs62303722:56348243:A:C	56348243	C	ADDxCHS_LP	766	0.01259	0.01247	-0.01185	0.03703	1.01	0.3128	0.003601	0.2837	0.393
4	rs62303728:56361929:G:A	56361929	A	ADDxCHS_LP	766	0.01259	0.01247	-0.01185	0.03703	1.01	0.3128	0.003601	0.2837	0.393
4	rs62303730:56365115:A:C	56365115	C	ADDxCHS_LP	766	0.01259	0.01247	-0.01185	0.03703	1.01	0.3128	0.003601	0.2837	0.393
4	rs62309729:56402846:A:G	56402846	G	ADDxCHS_LP	766	0.01259	0.01247	-0.01185	0.03703	1.01	0.3128	0.003601	0.2837	0.393
4	rs6802:56292101:A:T	56292101	T	ADDxCHS_LP	766	0.01259	0.01247	-0.01185	0.03703	1.01	0.3128	0.002401	0.284	0.3942
4	rs73236140:56306216:T:C	56306216	C	ADDxCHS_LP	766	0.01259	0.01247	-0.01185	0.03703	1.01	0.3128	0.002401	0.284	0.3942
4	rs41324951:56288743:C:G	56288743	G	ADDxCHS_LP	765	0.01258	0.01248	-0.01187	0.03704	1.008	0.3136	0.003601	0.2837	0.393
4	rs17721497:56311248:A:T	56311248	T	ADDxCHS_LP	764	0.01234	0.01248	-0.01212	0.0368	0.9887	0.3231	0.006002	0.285	0.4426
4	rs11735267:56347287:C:T	56347287	C	ADDxCHS_LP	763	0.01116	0.01159	-0.01155	0.03387	0.9634	0.3357	0.007203	0.3609	0.03467
4	rs13132420:56392813:G:A	56392813	A	ADDxCHS_LP	750	-0.009979	0.01168	-0.03287	0.01291	-0.8545	0.3931	0.02761	0.3414	0.1008
4	rs11133382:56316980:T:G	56316980	T	ADDxCHS_LP	763	0.009812	0.01172	-0.01315	0.03278	0.8375	0.4026	0.006002	0.3569	0.01898
4	rs13140173:56393331:C:T	56393331	T	ADDxCHS_LP	761	-0.009676	0.01163	-0.03248	0.01312	-0.8318	0.4058	0.009604	0.3176	0.09137
4	rs146471976:56293324:C:A	56293324	A	ADDxCHS_LP	736	0.01947	0.02417	-0.02791	0.06685	0.8053	0.4209	0.04322	0.06336	0.5495
4	rs13140590:56414833:A:G	56414833	G	ADDxCHS_LP	766	-0.009146	0.01157	-0.03181	0.01352	-0.7908	0.4293	0.002401	0.3171	0.06585
4	rs4864996:56319088:A:C	56319088	C	ADDxCHS_LP	764	-0.009105	0.0116	-0.03184	0.01363	-0.7849	0.4328	0.004802	0.3191	0.09326
4	rs12501746:56303605:C:T	56303605	T	ADDxCHS_LP	766	-0.009018	0.01158	-0.03172	0.01368	-0.7787	0.4364	0.002401	0.3183	0.09293
4	rs11932712:56302590:C:T	56302590	T	ADDxCHS_LP	767	-0.008993	0.01157	-0.03168	0.01369	-0.777	0.4374	0.0012	0.3185	0.09358
4	rs12512737:56321105:A:T	56321105	T	ADDxCHS_LP	767	-0.008993	0.01157	-0.03168	0.01369	-0.777	0.4374	0.0012	0.3185	0.09358
4	rs13125984:56321269:G:A	56321269	A	ADDxCHS_LP	767	-0.008993	0.01157	-0.03168	0.01369	-0.777	0.4374	0.0012	0.3185	0.09358
4	rs13128180:56286188:G:T	56286188	T	ADDxCHS_LP	767	-0.008993	0.01157	-0.03168	0.01369	-0.777	0.4374	0.0012	0.3185	0.09358
4	rs2412648:56321067:T:G	56321067	G	ADDxCHS_LP	767	-0.008993	0.01157	-0.03168	0.01369	-0.777	0.4374	0.0012	0.3185	0.09358
4	rs11939652:56398709:T:A	56398709	A	ADDxCHS_LP	765	-0.008923	0.01158	-0.03161	0.01377	-0.7708	0.4411	0.004802	0.3166	0.09161
4	rs13107810:56408410:C:A	56408410	A	ADDxCHS_LP	765	-0.008923	0.01158	-0.03161	0.01377	-0.7708	0.4411	0.004802	0.3166	0.09161
4	rs2035691:56395953:C:T	56395953	T	ADDxCHS_LP	765	-0.008923	0.01158	-0.03161	0.01377	-0.7708	0.4411	0.004802	0.3166	0.09161
4	rs2035692:56394968:T:A	56394968	A	ADDxCHS_LP	765	-0.008923	0.01158	-0.03161	0.01377	-0.7708	0.4411	0.004802	0.3166	0.09161
4	rs4507426:56395554:T:C	56395554	C	ADDxCHS_LP	765	-0.008923	0.01158	-0.03161	0.01377	-0.7708	0.4411	0.004802	0.3166	0.09161
4	rs7667741:56410788:T:C	56410788	C	ADDxCHS_LP	765	-0.008923	0.01158	-0.03161	0.01377	-0.7708	0.4411	0.003601	0.3175	0.07776
4	rs1965467:56322740:G:A	56322740	G	ADDxCHS_LP	765	0.008931	0.01159	-0.01378	0.03165	0.7706	0.4412	0.003601	0.3602	0.03483
4	rs28448438:56416665:C:T	56416665	T	ADDxCHS_LP	767	0.008844	0.01154	-0.01376	0.03145	0.7667	0.4435	0.0012	0.3594	0.013
4	rs1522114:56356062:A:G	56356062	G	ADDxCHS_LP	762	-0.008806	0.0116	-0.03154	0.01393	-0.7591	0.448	0.008403	0.3184	0.1086
4	rs4864543:56356395:C:T	56356395	T	ADDxCHS_LP	762	-0.008806	0.0116	-0.03154	0.01393	-0.7591	0.448	0.008403	0.3184	0.1086
4	rs4865001:56356343:T:C	56356343	C	ADDxCHS_LP	762	-0.008806	0.0116	-0.03154	0.01393	-0.7591	0.448	0.008403	0.3184	0.1086
4	rs6825774:56357317:G:T	56357317	T	ADDxCHS_LP	762	-0.008806	0.0116	-0.03154	0.01393	-0.7591	0.448	0.008403	0.3184	0.1086
4	rs11133389:56352885:C:T	56352885	T	ADDxCHS_LP	766	-0.008779	0.01157	-0.03145	0.0139	-0.7588	0.4482	0.003601	0.3169	0.09214
4	rs11939580:56383352:C:T	56383352	T	ADDxCHS_LP	766	-0.008779	0.01157	-0.03145	0.0139	-0.7588	0.4482	0.003601	0.3169	0.09214
4	rs12508367:56375609:T:C	56375609	C	ADDxCHS_LP	766	-0.008779	0.01157	-0.03145	0.0139	-0.7588	0.4482	0.003601	0.3169	0.09214
4	rs12510275:56382715:T:C	56382715	C	ADDxCHS_LP	766	-0.008779	0.01157	-0.03145	0.0139	-0.7588	0.4482	0.003601	0.3169	0.09214
4	rs12510327:56382911:T:C	56382911	C	ADDxCHS_LP	766	-0.008779	0.01157	-0.03145	0.0139	-0.7588	0.4482	0.003601	0.3169	0.09214
4	rs12649507:56380484:G:A	56380484	A	ADDxCHS_LP	766	-0.008779	0.01157	-0.03145	0.0139	-0.7588	0.4482	0.003601	0.3169	0.09214
4	rs13115570:56387392:T:G	56387392	G	ADDxCHS_LP	764	-0.008784	0.01158	-0.03147	0.01391	-0.7588	0.4482	0.006002	0.3164	0.07721
4	rs13124436:56368671:G:A	56368671	A	ADDxCHS_LP	766	-0.008779	0.01157	-0.03145	0.0139	-0.7588	0.4482	0.003601	0.3169	0.09214
4	rs13128179:56358887:C:T	56358887	T	ADDxCHS_LP	766	-0.008779	0.01157	-0.03145	0.0139	-0.7588	0.4482	0.003601	0.3169	0.09214
4	rs2272073:56376344:C:T	56376344	T	ADDxCHS_LP	766	-0.008779	0.01157	-0.03145	0.0139	-0.7588	0.4482	0.003601	0.3169	0.09214
4	rs3805153:56359724:T:G	56359724	G	ADDxCHS_LP	766	-0.008779	0.01157	-0.03145	0.0139	-0.7588	0.4482	0.003601	0.3169	0.09214
4	rs4865003:56380969:T:G	56380969	G	ADDxCHS_LP	766	-0.008779	0.01157	-0.03145	0.0139	-0.7588	0.4482	0.003601	0.3169	0.09214
4	rs6830409:56388396:T:C	56388396	C	ADDxCHS_LP	766	-0.008779	0.01157	-0.03145	0.0139	-0.7588	0.4482	0.003601	0.3169	0.09214
4	rs6843997:56375149:C:T	56375149	T	ADDxCHS_LP	766	-0.008779	0.01157	-0.03145	0.0139	-0.7588	0.4482	0.003601	0.3169	0.09214
4	rs7658446:56361429:T:C	56361429	C	ADDxCHS_LP	766	-0.008779	0.01157	-0.03145	0.0139	-0.7588	0.4482	0.003601	0.3169	0.09214
4	rs7699867:56349885:C:A	56349885	A	ADDxCHS_LP	766	-0.008779	0.01157	-0.03145	0.0139	-0.7588	0.4482	0.003601	0.3169	0.09214
4	rs11133383:56317045:C:T	56317045	C	ADDxCHS_LP	760	0.008748	0.01164	-0.01406	0.03155	0.7518	0.4524	0.009604	0.3624	0.01289
4	rs11133385:56326652:G:A	56326652	A	ADDxCHS_LP	768	-0.008555	0.01156	-0.03121	0.0141	-0.7402	0.4594	0.0012	0.3179	0.07921
4	rs10529258:56412869:G:A	56412869	A	ADDxCHS_LP	757	0.009074	0.01259	-0.01559	0.03374	0.721	0.4712	0.01441	0.2801	0.3414
4	rs115635692:56412873:A:C	56412873	C	ADDxCHS_LP	757	0.009074	0.01259	-0.01559	0.03374	0.721	0.4712	0.01441	0.2801	0.3414
4	rs116135676:56412874:G:T	56412874	T	ADDxCHS_LP	757	0.009074	0.01259	-0.01559	0.03374	0.721	0.4712	0.01441	0.2801	0.3414
4	rs1522107:56380773:A:T	56380773	A	ADDxCHS_LP	764	0.008306	0.01163	-0.01448	0.03109	0.7145	0.4752	0.004802	0.3565	0.02807
4	rs1522108:56380733:T:C	56380733	T	ADDxCHS_LP	764	0.008306	0.01163	-0.01448	0.03109	0.7145	0.4752	0.004802	0.3565	0.02807
4	rs6851838:56420747:A:C	56420747	C	ADDxCHS_LP	767	0.008226	0.01155	-0.01441	0.03086	0.7122	0.4766	0.0012	0.3594	0.01964
4	rs10034433:56421176:A:T	56421176	T	ADDxCHS_LP	768	0.008192	0.01154	-0.01443	0.03081	0.7098	0.4781	0	0.3589	0.01954
4	rs11133399:56413831:A:G	56413831	G	ADDxCHS_LP	768	0.008192	0.01154	-0.01443	0.03081	0.7098	0.4781	0	0.3589	0.01954
4	rs28463765:56412434:C:T	56412434	T	ADDxCHS_LP	768	0.008192	0.01154	-0.01443	0.03081	0.7098	0.4781	0	0.3589	0.01954
4	rs4865010:56414962:A:C	56414962	C	ADDxCHS_LP	768	0.008192	0.01154	-0.01443	0.03081	0.7098	0.4781	0	0.3589	0.01954
4	rs726967	56421713	A	ADDxCHS_LP	768	0.008192	0.01154	-0.01443	0.03081	0.7098	0.4781	0	0.3589	0.01954
4	rs6824955:56317136:T:G	56317136	T	ADDxCHS_LP	764	0.008038	0.01158	-0.01465	0.03072	0.6944	0.4876	0.004802	0.3583	0.0192
4	rs6849474:56318462:G:A	56318462	A	ADDxCHS_LP	765	-0.008028	0.01161	-0.03078	0.01473	-0.6914	0.4895	0.003601	0.3187	0.09305
4	rs11133379:56306111:G:A	56306111	G	ADDxCHS_LP	767	0.007971	0.01157	-0.0147	0.03065	0.689	0.491	0.0012	0.3582	0.02357
4	rs11733864:56321530:C:T	56321530	C	ADDxCHS_LP	767	0.007971	0.01157	-0.0147	0.03065	0.689	0.491	0.0012	0.3582	0.02357
4	rs12643926:56310621:C:T	56310621	C	ADDxCHS_LP	767	0.007971	0.01157	-0.0147	0.03065	0.689	0.491	0.0012	0.3582	0.02357
4	rs12647034:56310622:A:G	56310622	A	ADDxCHS_LP	767	0.007971	0.01157	-0.0147	0.03065	0.689	0.491	0.0012	0.3582	0.02357
4	rs13121235:56311947:A:G	56311947	A	ADDxCHS_LP	767	0.007971	0.01157	-0.0147	0.03065	0.689	0.491	0.0012	0.3582	0.02357
4	rs1522106:56307214:C:A	56307214	C	ADDxCHS_LP	767	0.007971	0.01157	-0.0147	0.03065	0.689	0.491	0.0012	0.3582	0.02357
4	rs2412646:56318772:T:C	56318772	T	ADDxCHS_LP	767	0.007971	0.01157	-0.0147	0.03065	0.689	0.491	0.0012	0.3582	0.02357
4	rs2412647:56319105:C:T	56319105	C	ADDxCHS_LP	767	0.007971	0.01157	-0.0147	0.03065	0.689	0.491	0.0012	0.3582	0.02357
4	rs3736544:56309992:A:G	56309992	A	ADDxCHS_LP	767	0.007971	0.01157	-0.0147	0.03065	0.689	0.491	0.0012	0.3582	0.02357
4	rs3736545:56310343:C:G	56310343	C	ADDxCHS_LP	767	0.007971	0.01157	-0.0147	0.03065	0.689	0.491	0.0012	0.3582	0.02357
4	rs3805147:56306730:C:T	56306730	C	ADDxCHS_LP	767	0.007971	0.01157	-0.0147	0.03065	0.689	0.491	0.0012	0.3582	0.02357
4	rs6811520:56315178:T:C	56315178	T	ADDxCHS_LP	767	0.007971	0.01157	-0.0147	0.03065	0.689	0.491	0.0012	0.3582	0.02357
4	rs473005:56288125:A:C	56288125	A	ADDxCHS_LP	766	0.007963	0.01158	-0.01473	0.03065	0.6879	0.4917	0.002401	0.358	0.01942
4	rs564762:56284631:C:T	56284631	C	ADDxCHS_LP	766	0.007963	0.01158	-0.01473	0.03065	0.6879	0.4917	0.002401	0.358	0.01942
4	rs10462035:56379178:G:A	56379178	G	ADDxCHS_LP	768	0.007778	0.01156	-0.01488	0.03044	0.6727	0.5014	0	0.3583	0.02387
4	rs11931061	56338793	G	ADDxCHS_LP	768	0.007778	0.01156	-0.01488	0.03044	0.6727	0.5014	0	0.3583	0.02387
4	rs11939815:56358283:T:G	56358283	T	ADDxCHS_LP	768	0.007778	0.01156	-0.01488	0.03044	0.6727	0.5014	0	0.3583	0.02387
4	rs11947476:56339751:T:C	56339751	T	ADDxCHS_LP	768	0.007778	0.01156	-0.01488	0.03044	0.6727	0.5014	0	0.3583	0.02387
4	rs11947623:56349190:C:A	56349190	C	ADDxCHS_LP	768	0.007778	0.01156	-0.01488	0.03044	0.6727	0.5014	0	0.3583	0.02387
4	rs12646078:56368204:T:C	56368204	T	ADDxCHS_LP	768	0.007778	0.01156	-0.01488	0.03044	0.6727	0.5014	0	0.3583	0.02387
4	rs13102385:56345255:T:C	56345255	T	ADDxCHS_LP	768	0.007778	0.01156	-0.01488	0.03044	0.6727	0.5014	0	0.3583	0.02387
4	rs13128582:56328944:C:G	56328944	C	ADDxCHS_LP	768	0.007778	0.01156	-0.01488	0.03044	0.6727	0.5014	0	0.3583	0.02387
4	rs13138697:56363309:G:A	56363309	G	ADDxCHS_LP	768	0.007778	0.01156	-0.01488	0.03044	0.6727	0.5014	0	0.3583	0.02387
4	rs13152650:56357858:T:C	56357858	T	ADDxCHS_LP	768	0.007778	0.01156	-0.01488	0.03044	0.6727	0.5014	0	0.3583	0.02387
4	rs1522110:56380283:C:T	56380283	C	ADDxCHS_LP	768	0.007778	0.01156	-0.01488	0.03044	0.6727	0.5014	0	0.3583	0.02387
4	rs1522111:56329563:T:A	56329563	T	ADDxCHS_LP	768	0.007778	0.01156	-0.01488	0.03044	0.6727	0.5014	0	0.3583	0.02387
4	rs1980273:56367401:C:G	56367401	C	ADDxCHS_LP	768	0.007778	0.01156	-0.01488	0.03044	0.6727	0.5014	0	0.3583	0.02387
4	rs2140077:56338953:A:G	56338953	A	ADDxCHS_LP	768	0.007778	0.01156	-0.01488	0.03044	0.6727	0.5014	0	0.3583	0.02387
4	rs2177127:56379959:A:C	56379959	A	ADDxCHS_LP	768	0.007778	0.01156	-0.01488	0.03044	0.6727	0.5014	0	0.3583	0.02387
4	rs2177129:56365414:C:T	56365414	C	ADDxCHS_LP	768	0.007778	0.01156	-0.01488	0.03044	0.6727	0.5014	0	0.3583	0.02387
4	rs35767091:56346723:G:A	56346723	G	ADDxCHS_LP	768	0.007778	0.01156	-0.01488	0.03044	0.6727	0.5014	0	0.3583	0.02387
4	rs3805152:56359658:C:T	56359658	C	ADDxCHS_LP	768	0.007778	0.01156	-0.01488	0.03044	0.6727	0.5014	0	0.3583	0.02387
4	rs3805154:56363927:C:T	56363927	C	ADDxCHS_LP	768	0.007778	0.01156	-0.01488	0.03044	0.6727	0.5014	0	0.3583	0.02387
4	rs3805157:56364103:A:G	56364103	A	ADDxCHS_LP	768	0.007778	0.01156	-0.01488	0.03044	0.6727	0.5014	0	0.3583	0.02387
4	rs3828481:56376664:T:C	56376664	T	ADDxCHS_LP	768	0.007778	0.01156	-0.01488	0.03044	0.6727	0.5014	0	0.3583	0.02387
4	rs4371676:56329008:G:A	56329008	G	ADDxCHS_LP	768	0.007778	0.01156	-0.01488	0.03044	0.6727	0.5014	0	0.3583	0.02387
4	rs4580704:56326707:G:C	56326707	G	ADDxCHS_LP	768	0.007778	0.01156	-0.01488	0.03044	0.6727	0.5014	0	0.3583	0.02387
4	rs4864998:56332606:A:G	56332606	A	ADDxCHS_LP	768	0.007778	0.01156	-0.01488	0.03044	0.6727	0.5014	0	0.3583	0.02387
4	rs58894703:56358538:G:A	56358538	G	ADDxCHS_LP	768	0.007778	0.01156	-0.01488	0.03044	0.6727	0.5014	0	0.3583	0.02387
4	rs62303714:56329018:A:T	56329018	A	ADDxCHS_LP	768	0.007778	0.01156	-0.01488	0.03044	0.6727	0.5014	0	0.3583	0.02387
4	rs6810948:56351192:A:G	56351192	A	ADDxCHS_LP	768	0.007778	0.01156	-0.01488	0.03044	0.6727	0.5014	0	0.3583	0.02387
4	rs6817267:56338541:G:A	56338541	G	ADDxCHS_LP	768	0.007778	0.01156	-0.01488	0.03044	0.6727	0.5014	0	0.3583	0.02387
4	rs6819660:56374577:T:G	56374577	T	ADDxCHS_LP	768	0.007778	0.01156	-0.01488	0.03044	0.6727	0.5014	0	0.3583	0.02387
4	rs6824057:56367278:G:C	56367278	G	ADDxCHS_LP	768	0.007778	0.01156	-0.01488	0.03044	0.6727	0.5014	0	0.3583	0.02387
4	rs6837710:56374455:C:T	56374455	C	ADDxCHS_LP	768	0.007778	0.01156	-0.01488	0.03044	0.6727	0.5014	0	0.3583	0.02387
4	rs6846427:56335448:C:G	56335448	C	ADDxCHS_LP	768	0.007778	0.01156	-0.01488	0.03044	0.6727	0.5014	0	0.3583	0.02387
4	rs7667849:56388199:A:G	56388199	G	ADDxCHS_LP	768	0.007778	0.01156	-0.01488	0.03044	0.6727	0.5014	0	0.3583	0.02387
4	rs7668147:56339384:C:T	56339384	C	ADDxCHS_LP	768	0.007778	0.01156	-0.01488	0.03044	0.6727	0.5014	0	0.3583	0.02387
4	rs7670225:56368018:C:T	56368018	C	ADDxCHS_LP	768	0.007778	0.01156	-0.01488	0.03044	0.6727	0.5014	0	0.3583	0.02387
4	rs7677526:56349908:A:T	56349908	A	ADDxCHS_LP	768	0.007778	0.01156	-0.01488	0.03044	0.6727	0.5014	0	0.3583	0.02387
4	rs7684810:56352794:C:T	56352794	C	ADDxCHS_LP	768	0.007778	0.01156	-0.01488	0.03044	0.6727	0.5014	0	0.3583	0.02387
4	rs9312662:56386371:T:C	56386371	C	ADDxCHS_LP	768	0.007778	0.01156	-0.01488	0.03044	0.6727	0.5014	0	0.3583	0.02387
4	rs9997288:56347227:T:C	56347227	T	ADDxCHS_LP	768	0.007778	0.01156	-0.01488	0.03044	0.6727	0.5014	0	0.3583	0.02387
4	rs60797008:56388672:A:T	56388672	T	ADDxCHS_LP	755	0.007838	0.01166	-0.01502	0.0307	0.6721	0.5018	0.01921	0.3599	0.02263
4	rs10002541:56395011:T:C	56395011	C	ADDxCHS_LP	767	0.00768	0.01157	-0.01499	0.03035	0.6639	0.507	0.0012	0.3582	0.02357
4	rs10005989:56405206:C:T	56405206	T	ADDxCHS_LP	767	0.00768	0.01157	-0.01499	0.03035	0.6639	0.507	0.0012	0.3582	0.02357
4	rs11726609:56400869:T:A	56400869	A	ADDxCHS_LP	767	0.00768	0.01157	-0.01499	0.03035	0.6639	0.507	0.0012	0.3582	0.02357
4	rs17085889:56402115:G:A	56402115	A	ADDxCHS_LP	767	0.00768	0.01157	-0.01499	0.03035	0.6639	0.507	0.0012	0.3582	0.02357
4	rs28525309:56406236:G:C	56406236	C	ADDxCHS_LP	767	0.00768	0.01157	-0.01499	0.03035	0.6639	0.507	0.0012	0.3582	0.02357
4	rs28582059:56408404:G:C	56408404	C	ADDxCHS_LP	767	0.00768	0.01157	-0.01499	0.03035	0.6639	0.507	0.0012	0.3582	0.02357
4	rs28790098:56398109:C:T	56398109	T	ADDxCHS_LP	767	0.00768	0.01157	-0.01499	0.03035	0.6639	0.507	0.0012	0.3582	0.02357
4	rs3817444	56375981	A	ADDxCHS_LP	768	0.007676	0.01156	-0.01499	0.03034	0.6638	0.507	0	0.3577	0.03457
4	rs4865008:56410855:T:G	56410855	G	ADDxCHS_LP	767	0.00768	0.01157	-0.01499	0.03035	0.6639	0.507	0.0012	0.3582	0.02357
4	rs62309727:56391793:G:A	56391793	A	ADDxCHS_LP	767	0.00768	0.01157	-0.01499	0.03035	0.6639	0.507	0.0012	0.3582	0.02357
4	rs6812042:56396079:G:T	56396079	T	ADDxCHS_LP	767	0.00768	0.01157	-0.01499	0.03035	0.6639	0.507	0.0012	0.3582	0.02357
4	rs6815516:56399184:A:T	56399184	T	ADDxCHS_LP	767	0.00768	0.01157	-0.01499	0.03035	0.6639	0.507	0.0012	0.3582	0.02357
4	rs6839788:56393040:G:T	56393040	T	ADDxCHS_LP	767	0.00768	0.01157	-0.01499	0.03035	0.6639	0.507	0.0012	0.3582	0.02357
4	rs7673908:56394819:A:G	56394819	G	ADDxCHS_LP	767	0.00768	0.01157	-0.01499	0.03035	0.6639	0.507	0.0012	0.3582	0.02357
4	rs9998038:56397849:C:T	56397849	T	ADDxCHS_LP	767	0.00768	0.01157	-0.01499	0.03035	0.6639	0.507	0.0012	0.3582	0.02357
4	rs9998146:56397977:C:T	56397977	T	ADDxCHS_LP	767	0.00768	0.01157	-0.01499	0.03035	0.6639	0.507	0.0012	0.3582	0.02357
4	rs6554286:56400304:T:G	56400304	G	ADDxCHS_LP	765	0.007388	0.01159	-0.01533	0.03011	0.6373	0.5241	0.003601	0.3578	0.02839
4	rs6834676:56298414:C:G	56298414	C	ADDxCHS_LP	765	0.007278	0.01153	-0.01533	0.02988	0.6311	0.5282	0.003601	0.3614	0.0131
4	rs6843722:56331332:A:C	56331332	C	ADDxCHS_LP	761	-0.007174	0.01161	-0.02993	0.01559	-0.6177	0.5369	0.009604	0.32	0.09322
4	rs10016506:56396674:G:T	56396674	T	ADDxCHS_LP	766	0.007086	0.01158	-0.01561	0.02978	0.6121	0.5407	0.002401	0.3586	0.02364
4	rs6832769:56298194:G:A	56298194	G	ADDxCHS_LP	761	0.007119	0.01166	-0.01574	0.02998	0.6104	0.5418	0.008403	0.3571	0.02794
4	rs6554280:56374952:A:G	56374952	A	ADDxCHS_LP	765	0.006932	0.01163	-0.01586	0.02973	0.5961	0.5513	0.003601	0.3566	0.0285
4	rs6853192:56409254:T:A	56409254	A	ADDxCHS_LP	766	0.006514	0.01157	-0.01617	0.0292	0.5628	0.5737	0.003601	0.3596	0.02881
4	rs12648271:56368122:G:C	56368122	C	ADDxCHS_LP	759	-0.006964	0.01242	-0.03131	0.01738	-0.5606	0.5752	0.012	0.2849	0.3045
4	rs28670674:56407103:G:A	56407103	A	ADDxCHS_LP	762	0.006381	0.01171	-0.01657	0.02933	0.5449	0.586	0.007203	0.3609	0.03467
4	rs12504300:56348527:G:C	56348527	C	ADDxCHS_LP	765	-0.006142	0.01239	-0.03042	0.01814	-0.4958	0.6202	0.004802	0.2859	0.3071
4	rs62303685:56285082:C:G	56285082	G	ADDxCHS_LP	739	0.006758	0.01379	-0.02027	0.03378	0.4901	0.6242	0.03962	0.2056	0.1935
4	rs3792603:56302058:A:G	56302058	G	ADDxCHS_LP	740	0.006738	0.01378	-0.02027	0.03375	0.489	0.625	0.03842	0.2054	0.1932
4	rs62303690:56306005:T:C	56306005	C	ADDxCHS_LP	740	0.006738	0.01378	-0.02027	0.03375	0.489	0.625	0.03842	0.2054	0.1932
4	rs62303709:56315182:C:T	56315182	T	ADDxCHS_LP	740	0.006738	0.01378	-0.02027	0.03375	0.489	0.625	0.03842	0.2054	0.1932
4	rs62303715:56333060:A:C	56333060	C	ADDxCHS_LP	740	0.006738	0.01378	-0.02027	0.03375	0.489	0.625	0.03962	0.205	0.1599
4	rs62303716:56334252:C:A	56334252	A	ADDxCHS_LP	740	0.006738	0.01378	-0.02027	0.03375	0.489	0.625	0.03962	0.205	0.1599
4	rs6828474:56341907:A:T	56341907	T	ADDxCHS_LP	740	0.006738	0.01378	-0.02027	0.03375	0.489	0.625	0.03962	0.205	0.1599
4	rs62305269:56373404:C:A	56373404	A	ADDxCHS_LP	742	0.006234	0.01367	-0.02055	0.03302	0.4561	0.6484	0.03721	0.2064	0.1602
4	rs73236149:56373474:C:T	56373474	T	ADDxCHS_LP	742	0.006234	0.01367	-0.02055	0.03302	0.4561	0.6484	0.03721	0.2064	0.1602
4	rs62309728:56396815:G:A	56396815	A	ADDxCHS_LP	743	0.005998	0.01365	-0.02076	0.03276	0.4393	0.6606	0.03601	0.208	0.1978
4	rs55869433:56410937:C:T	56410937	T	ADDxCHS_LP	744	0.005979	0.01365	-0.02077	0.03272	0.4381	0.6614	0.03361	0.2081	0.1989
4	rs62309730:56407697:A:G	56407697	G	ADDxCHS_LP	744	0.005979	0.01365	-0.02077	0.03272	0.4381	0.6614	0.03481	0.2083	0.1992
4	rs62303724:56351281:C:A	56351281	A	ADDxCHS_LP	740	0.005818	0.01374	-0.02111	0.03275	0.4235	0.6721	0.03962	0.205	0.1599
4	rs56055342:56407095:T:C	56407095	C	ADDxCHS_LP	760	-0.004859	0.01194	-0.02826	0.01854	-0.407	0.6842	0.0108	0.3125	0.1684
4	rs1488941:56383966:T:C	56383966	C	ADDxCHS_LP	732	0.003898	0.01374	-0.02304	0.03083	0.2837	0.7767	0.04802	0.2182	0.5318
4	rs10462028:56298300:G:A	56298300	A	ADDxCHS_LP	768	0.0005494	0.01203	-0.02303	0.02413	0.04566	0.9636	0	0.3235	0.476
4	rs57826934:56323379:C:T	56323379	T	ADDxCHS_LP	768	0.0005494	0.01203	-0.02303	0.02413	0.04566	0.9636	0	0.3235	0.476

## Sheet: dominant
CHR	SNP	BP	A1	TEST	NMISS	BETA	SE	L95	U95	STAT	P	F_MISS	MAF	HWE
4	rs711533:56289379:C:A	56289379	C	DOMxCHS_LP	768	0.05811	0.01719	0.02443	0.0918	3.381	0.0007588	0.0012	0.1755	0.4717
4	rs530875:56289779:A:G	56289779	A	DOMxCHS_LP	768	0.05811	0.01719	0.02443	0.0918	3.381	0.0007588	0.0012	0.1755	0.4717
4	rs532768:56289999:A:G	56289999	A	DOMxCHS_LP	768	0.05811	0.01719	0.02443	0.0918	3.381	0.0007588	0.0012	0.1755	0.4717
4	rs534654	56290220	A	DOMxCHS_LP	768	0.05811	0.01719	0.02443	0.0918	3.381	0.0007588	0	0.1759	0.4048
4	rs471546:56286613:A:T	56286613	A	DOMxCHS_LP	767	0.05814	0.0172	0.02443	0.09184	3.38	0.0007614	0.002401	0.1757	0.4717
4	rs504836:56285305:C:T	56285305	C	DOMxCHS_LP	767	0.05814	0.0172	0.02443	0.09184	3.38	0.0007614	0.002401	0.1757	0.4717
4	rs549564:56286717:T:C	56286717	T	DOMxCHS_LP	767	0.05814	0.0172	0.02443	0.09184	3.38	0.0007614	0.002401	0.1757	0.4717
4	rs505861:56285166:T:G	56285166	T	DOMxCHS_LP	766	0.05789	0.01723	0.02412	0.09167	3.36	0.0008194	0.003601	0.1753	0.4713
4	rs142902983:56406335:C:T	56406335	T	DOMxCHS_LP	749	0.05777	0.01747	0.02353	0.09202	3.307	0.0009891	0.02761	0.1716	0.538
4	rs3749473:56294628:T:C	56294628	T	DOMxCHS_LP	765	0.03308	0.01657	0.0005988	0.06556	1.996	0.04628	0.004802	0.4596	0.209
4	rs6828454:56290496:C:T	56290496	C	DOMxCHS_LP	766	0.0325	0.01663	-8.4e-05	0.06509	1.955	0.05096	0.003601	0.459	0.2636
4	rs6858684:56289778:C:T	56289778	C	DOMxCHS_LP	764	0.03204	0.01665	-0.0005918	0.06467	1.924	0.05468	0.006002	0.4589	0.2344
4	rs10049561:56292790:A:G	56292790	A	DOMxCHS_LP	767	0.03195	0.01662	-0.0006169	0.06452	1.923	0.05487	0.002401	0.4591	0.2946
4	rs11732723:56290558:C:T	56290558	C	DOMxCHS_LP	767	0.03179	0.01663	-0.0008114	0.06439	1.911	0.05636	0.002401	0.4597	0.236
4	rs6858749:56290437:T:C	56290437	T	DOMxCHS_LP	767	0.03179	0.01663	-0.0008114	0.06439	1.911	0.05636	0.002401	0.4597	0.236
4	rs6825994:56390411:C:A	56390411	A	DOMxCHS_LP	751	0.02382	0.01615	-0.007844	0.05548	1.474	0.1408	0.02041	0.3585	0.01482
4	rs4864994:56318122:A:C	56318122	C	DOMxCHS_LP	762	-0.0236	0.01602	-0.055	0.007792	-1.474	0.141	0.008403	0.3596	0.1738
4	rs4864548	56413803	A	DOMxCHS_LP	768	-0.02301	0.01593	-0.05422	0.008205	-1.445	0.1489	0	0.3571	0.08248
4	rs3749472:56294032:A:G	56294032	A	DOMxCHS_LP	765	0.02458	0.0172	-0.009123	0.05829	1.429	0.1533	0.004802	0.4982	0.2663
4	rs1047354:56295583:A:G	56295583	G	DOMxCHS_LP	767	-0.0228	0.01597	-0.05411	0.008499	-1.428	0.1538	0.0012	0.3576	0.1517
4	rs10517346:56323194:G:C	56323194	C	DOMxCHS_LP	767	-0.0228	0.01597	-0.05411	0.008499	-1.428	0.1538	0.0012	0.3576	0.1517
4	rs1056547:56296763:T:G	56296763	G	DOMxCHS_LP	767	-0.0228	0.01597	-0.05411	0.008499	-1.428	0.1538	0.0012	0.3576	0.1517
4	rs11133378:56305639:C:T	56305639	T	DOMxCHS_LP	767	-0.0228	0.01597	-0.05411	0.008499	-1.428	0.1538	0.0012	0.3576	0.1517
4	rs11133380:56307277:A:G	56307277	G	DOMxCHS_LP	767	-0.0228	0.01597	-0.05411	0.008499	-1.428	0.1538	0.0012	0.3576	0.1517
4	rs11133381:56316979:T:C	56316979	C	DOMxCHS_LP	767	-0.0228	0.01597	-0.05411	0.008499	-1.428	0.1538	0.0012	0.3576	0.1517
4	rs11133384:56323253:C:G	56323253	G	DOMxCHS_LP	767	-0.0228	0.01597	-0.05411	0.008499	-1.428	0.1538	0.0012	0.3576	0.1517
4	rs11937487:56302743:A:G	56302743	G	DOMxCHS_LP	767	-0.0228	0.01597	-0.05411	0.008499	-1.428	0.1538	0.0012	0.3576	0.1517
4	rs11945370:56309042:A:G	56309042	G	DOMxCHS_LP	767	-0.0228	0.01597	-0.05411	0.008499	-1.428	0.1538	0.0012	0.3576	0.1517
4	rs12510110:56307734:A:G	56307734	G	DOMxCHS_LP	767	-0.0228	0.01597	-0.05411	0.008499	-1.428	0.1538	0.0012	0.3576	0.1517
4	rs12510990:56308074:T:C	56308074	C	DOMxCHS_LP	767	-0.0228	0.01597	-0.05411	0.008499	-1.428	0.1538	0.0012	0.3576	0.1517
4	rs12647677:56310420:T:C	56310420	C	DOMxCHS_LP	767	-0.0228	0.01597	-0.05411	0.008499	-1.428	0.1538	0.0012	0.3576	0.1517
4	rs12651640:56320321:T:A	56320321	A	DOMxCHS_LP	767	-0.0228	0.01597	-0.05411	0.008499	-1.428	0.1538	0.0012	0.3582	0.1313
4	rs1474271:56302079:C:T	56302079	T	DOMxCHS_LP	767	-0.0228	0.01597	-0.05411	0.008499	-1.428	0.1538	0.0012	0.3576	0.1517
4	rs1554483:56321817:C:G	56321817	G	DOMxCHS_LP	767	-0.0228	0.01597	-0.05411	0.008499	-1.428	0.1538	0.0012	0.3576	0.1517
4	rs1554484:56324339:T:C	56324339	C	DOMxCHS_LP	767	-0.0228	0.01597	-0.05411	0.008499	-1.428	0.1538	0.0012	0.3576	0.1517
4	rs3749474:56300685:C:T	56300685	T	DOMxCHS_LP	767	-0.0228	0.01597	-0.05411	0.008499	-1.428	0.1538	0.0012	0.3576	0.1517
4	rs3805146:56303152:C:T	56303152	T	DOMxCHS_LP	767	-0.0228	0.01597	-0.05411	0.008499	-1.428	0.1538	0.0012	0.3576	0.1517
4	rs3805148:56306810:A:C	56306810	C	DOMxCHS_LP	767	-0.0228	0.01597	-0.05411	0.008499	-1.428	0.1538	0.0012	0.3576	0.1517
4	rs3805149:56308351:C:T	56308351	T	DOMxCHS_LP	767	-0.0228	0.01597	-0.05411	0.008499	-1.428	0.1538	0.0012	0.3576	0.1517
4	rs3805150:56313036:C:T	56313036	T	DOMxCHS_LP	767	-0.0228	0.01597	-0.05411	0.008499	-1.428	0.1538	0.0012	0.3576	0.1517
4	rs4864990:56313690:A:G	56313690	G	DOMxCHS_LP	767	-0.0228	0.01597	-0.05411	0.008499	-1.428	0.1538	0.0012	0.3576	0.1517
4	rs4864995:56319020:A:G	56319020	G	DOMxCHS_LP	767	-0.0228	0.01597	-0.05411	0.008499	-1.428	0.1538	0.0012	0.3576	0.1517
4	rs6828570:56297762:C:G	56297762	G	DOMxCHS_LP	767	-0.0228	0.01597	-0.05411	0.008499	-1.428	0.1538	0.0012	0.3576	0.1517
4	rs7677952:56291479:C:T	56291479	T	DOMxCHS_LP	767	-0.0228	0.01597	-0.05411	0.008499	-1.428	0.1538	0.0012	0.3576	0.1517
4	rs1056545:56296897:G:A	56296897	A	DOMxCHS_LP	763	-0.02287	0.01603	-0.05428	0.008534	-1.427	0.1539	0.006002	0.3593	0.1743
4	rs5863:56296907:A:G	56296907	G	DOMxCHS_LP	763	-0.02287	0.01603	-0.05428	0.008534	-1.427	0.1539	0.006002	0.3593	0.1743
4	rs11932293:56420192:G:C	56420192	C	DOMxCHS_LP	768	-0.02268	0.01593	-0.0539	0.008547	-1.423	0.155	0	0.3571	0.1129
4	rs11934897:56419563:T:C	56419563	C	DOMxCHS_LP	768	-0.02268	0.01593	-0.0539	0.008547	-1.423	0.155	0	0.3571	0.1129
4	rs12505266:56412169:C:T	56412169	T	DOMxCHS_LP	768	-0.02268	0.01593	-0.0539	0.008547	-1.423	0.155	0	0.3571	0.1129
4	rs13115828:56417614:T:C	56417614	C	DOMxCHS_LP	768	-0.02268	0.01593	-0.0539	0.008547	-1.423	0.155	0	0.3571	0.1129
4	rs13118520:56415283:G:C	56415283	C	DOMxCHS_LP	768	-0.02268	0.01593	-0.0539	0.008547	-1.423	0.155	0	0.3571	0.1129
4	rs13136282:56418012:C:G	56418012	G	DOMxCHS_LP	768	-0.02268	0.01593	-0.0539	0.008547	-1.423	0.155	0	0.3571	0.1129
4	rs4864549:56420547:G:T	56420547	T	DOMxCHS_LP	768	-0.02268	0.01593	-0.0539	0.008547	-1.423	0.155	0	0.3571	0.1129
4	rs4865011:56420623:A:G	56420623	G	DOMxCHS_LP	768	-0.02268	0.01593	-0.0539	0.008547	-1.423	0.155	0	0.3571	0.1129
4	rs56154935:56412545:C:G	56412545	G	DOMxCHS_LP	768	-0.02268	0.01593	-0.0539	0.008547	-1.423	0.155	0	0.3571	0.1129
4	rs7662966:56414428:G:C	56414428	C	DOMxCHS_LP	768	-0.02268	0.01593	-0.0539	0.008547	-1.423	0.155	0	0.3571	0.1129
4	rs7691799:56411741:C:A	56411741	A	DOMxCHS_LP	768	-0.02268	0.01593	-0.0539	0.008547	-1.423	0.155	0	0.3571	0.1129
4	rs11942279:56305819:T:C	56305819	C	DOMxCHS_LP	766	-0.02264	0.01599	-0.05399	0.008702	-1.416	0.1572	0.002401	0.358	0.152
4	rs11133396:56390413:A:C	56390413	C	DOMxCHS_LP	767	-0.02232	0.01595	-0.05358	0.008942	-1.399	0.1621	0.002401	0.3568	0.1305
4	rs11726198:56390002:T:C	56390002	C	DOMxCHS_LP	767	-0.02232	0.01595	-0.05358	0.008942	-1.399	0.1621	0.002401	0.3568	0.1305
4	rs11932880:56398077:C:A	56398077	A	DOMxCHS_LP	767	-0.02232	0.01595	-0.05358	0.008942	-1.399	0.1621	0.002401	0.3562	0.1509
4	rs12507722:56402588:G:A	56402588	A	DOMxCHS_LP	767	-0.02232	0.01595	-0.05358	0.008942	-1.399	0.1621	0.002401	0.3568	0.1305
4	rs13106406:56408486:G:C	56408486	C	DOMxCHS_LP	767	-0.02232	0.01595	-0.05358	0.008942	-1.399	0.1621	0.002401	0.3568	0.1305
4	rs13108499:56392681:A:C	56392681	C	DOMxCHS_LP	767	-0.02232	0.01595	-0.05358	0.008942	-1.399	0.1621	0.002401	0.3568	0.1305
4	rs13113518:56399648:T:C	56399648	C	DOMxCHS_LP	767	-0.02232	0.01595	-0.05358	0.008942	-1.399	0.1621	0.002401	0.3568	0.1305
4	rs13116194:56397317:G:A	56397317	A	DOMxCHS_LP	767	-0.02232	0.01595	-0.05358	0.008942	-1.399	0.1621	0.002401	0.3568	0.1305
4	rs13117836:56397385:C:T	56397385	T	DOMxCHS_LP	767	-0.02232	0.01595	-0.05358	0.008942	-1.399	0.1621	0.002401	0.3568	0.1305
4	rs13132084:56399912:G:A	56399912	A	DOMxCHS_LP	767	-0.02232	0.01595	-0.05358	0.008942	-1.399	0.1621	0.002401	0.3568	0.1305
4	rs13134752:56408511:A:T	56408511	T	DOMxCHS_LP	767	-0.02232	0.01595	-0.05358	0.008942	-1.399	0.1621	0.002401	0.3568	0.1305
4	rs13141049:56401656:T:C	56401656	C	DOMxCHS_LP	767	-0.02232	0.01595	-0.05358	0.008942	-1.399	0.1621	0.002401	0.3568	0.1305
4	rs13152173:56400955:G:T	56400955	T	DOMxCHS_LP	767	-0.02232	0.01595	-0.05358	0.008942	-1.399	0.1621	0.002401	0.3568	0.1305
4	rs34648901:56407426:C:T	56407426	T	DOMxCHS_LP	767	-0.02232	0.01595	-0.05358	0.008942	-1.399	0.1621	0.002401	0.3568	0.1305
4	rs4864546:56404127:G:A	56404127	A	DOMxCHS_LP	767	-0.02232	0.01595	-0.05358	0.008942	-1.399	0.1621	0.002401	0.3568	0.1305
4	rs4865007:56403717:C:T	56403717	T	DOMxCHS_LP	767	-0.02232	0.01595	-0.05358	0.008942	-1.399	0.1621	0.002401	0.3568	0.1305
4	rs7660980:56409115:C:A	56409115	A	DOMxCHS_LP	767	-0.02232	0.01595	-0.05358	0.008942	-1.399	0.1621	0.0012	0.3576	0.1131
4	rs7668429:56397978:G:A	56397978	A	DOMxCHS_LP	767	-0.02232	0.01595	-0.05358	0.008942	-1.399	0.1621	0.002401	0.3568	0.1305
4	rs7669635:56397820:C:T	56397820	T	DOMxCHS_LP	767	-0.02232	0.01595	-0.05358	0.008942	-1.399	0.1621	0.002401	0.3568	0.1305
4	rs7675109:56391756:G:A	56391756	A	DOMxCHS_LP	767	-0.02232	0.01595	-0.05358	0.008942	-1.399	0.1621	0.002401	0.3568	0.1305
4	rs7686058:56405164:C:T	56405164	T	DOMxCHS_LP	767	-0.02232	0.01595	-0.05358	0.008942	-1.399	0.1621	0.002401	0.3568	0.1305
4	rs7696832:56403247:A:G	56403247	G	DOMxCHS_LP	767	-0.02232	0.01595	-0.05358	0.008942	-1.399	0.1621	0.002401	0.3568	0.1305
4	rs6810483:56290573:T:C	56290573	T	DOMxCHS_LP	766	0.02409	0.01726	-0.009733	0.05791	1.396	0.1631	0.003601	0.4982	0.2672
4	rs4865005:56391948:T:A	56391948	A	DOMxCHS_LP	766	-0.02221	0.01597	-0.0535	0.009084	-1.391	0.1646	0.003601	0.3572	0.1307
4	rs12642716:56346163:G:A	56346163	A	DOMxCHS_LP	767	-0.02216	0.01595	-0.05341	0.009092	-1.39	0.165	0.002401	0.3574	0.1511
4	rs12506788:56343593:C:T	56343593	T	DOMxCHS_LP	766	-0.02212	0.01595	-0.05338	0.009144	-1.387	0.1659	0.004802	0.3577	0.1311
4	rs11133397:56400333:C:A	56400333	A	DOMxCHS_LP	765	-0.02215	0.01597	-0.05346	0.009162	-1.386	0.166	0.004802	0.3565	0.1503
4	rs11133398:56400347:C:T	56400347	T	DOMxCHS_LP	765	-0.02215	0.01597	-0.05346	0.009162	-1.386	0.166	0.004802	0.3565	0.1503
4	rs13114841:56352141:T:C	56352141	C	DOMxCHS_LP	767	-0.02211	0.01596	-0.05339	0.00917	-1.385	0.1663	0.002401	0.3574	0.1511
4	rs10462032:56345236:T:C	56345236	C	DOMxCHS_LP	768	-0.02199	0.01594	-0.05322	0.009244	-1.38	0.168	0.0012	0.357	0.1314
4	rs10517344:56343712:A:C	56343712	C	DOMxCHS_LP	768	-0.02199	0.01594	-0.05322	0.009244	-1.38	0.168	0.0012	0.357	0.1314
4	rs11133386:56327487:A:T	56327487	T	DOMxCHS_LP	768	-0.02199	0.01594	-0.05322	0.009244	-1.38	0.168	0.0012	0.357	0.1314
4	rs11133387:56341297:C:G	56341297	G	DOMxCHS_LP	768	-0.02199	0.01594	-0.05322	0.009244	-1.38	0.168	0.0012	0.357	0.1314
4	rs11133388:56344033:G:C	56344033	C	DOMxCHS_LP	768	-0.02199	0.01594	-0.05322	0.009244	-1.38	0.168	0.0012	0.357	0.1314
4	rs11133390:56367893:A:G	56367893	G	DOMxCHS_LP	768	-0.02199	0.01594	-0.05322	0.009244	-1.38	0.168	0.0012	0.357	0.1314
4	rs11133391:56367955:T:C	56367955	C	DOMxCHS_LP	768	-0.02199	0.01594	-0.05322	0.009244	-1.38	0.168	0.0012	0.357	0.1314
4	rs11133392:56373896:T:A	56373896	A	DOMxCHS_LP	768	-0.02199	0.01594	-0.05322	0.009244	-1.38	0.168	0.0012	0.357	0.1314
4	rs11133395:56383651:C:T	56383651	T	DOMxCHS_LP	768	-0.02199	0.01594	-0.05322	0.009244	-1.38	0.168	0.0012	0.357	0.1314
4	rs11722049:56346901:A:G	56346901	G	DOMxCHS_LP	768	-0.02199	0.01594	-0.05322	0.009244	-1.38	0.168	0.0012	0.357	0.1314
4	rs11724094:56367646:C:A	56367646	A	DOMxCHS_LP	768	-0.02199	0.01594	-0.05322	0.009244	-1.38	0.168	0.0012	0.357	0.1314
4	rs11729220:56367796:T:G	56367796	G	DOMxCHS_LP	768	-0.02199	0.01594	-0.05322	0.009244	-1.38	0.168	0.0012	0.357	0.1314
4	rs12500162:56363100:T:C	56363100	C	DOMxCHS_LP	768	-0.02199	0.01594	-0.05322	0.009244	-1.38	0.168	0.0012	0.357	0.1314
4	rs12501327:56373415:C:G	56373415	G	DOMxCHS_LP	768	-0.02199	0.01594	-0.05322	0.009244	-1.38	0.168	0.0012	0.357	0.1314
4	rs12501636:56348484:T:A	56348484	A	DOMxCHS_LP	768	-0.02199	0.01594	-0.05322	0.009244	-1.38	0.168	0.0012	0.357	0.1314
4	rs12503578:56375534:C:G	56375534	G	DOMxCHS_LP	768	-0.02199	0.01594	-0.05322	0.009244	-1.38	0.168	0.0012	0.357	0.1314
4	rs12510681:56362904:C:T	56362904	T	DOMxCHS_LP	768	-0.02199	0.01594	-0.05322	0.009244	-1.38	0.168	0.0012	0.357	0.1314
4	rs12644948:56336433:C:T	56336433	T	DOMxCHS_LP	768	-0.02199	0.01594	-0.05322	0.009244	-1.38	0.168	0.0012	0.357	0.1314
4	rs13107988:56351378:T:C	56351378	C	DOMxCHS_LP	768	-0.02199	0.01594	-0.05322	0.009244	-1.38	0.168	0.0012	0.357	0.1314
4	rs13108409:56386445:T:C	56386445	C	DOMxCHS_LP	768	-0.02199	0.01594	-0.05322	0.009244	-1.38	0.168	0.0012	0.357	0.1314
4	rs13118237:56340426:T:G	56340426	G	DOMxCHS_LP	768	-0.02199	0.01594	-0.05322	0.009244	-1.38	0.168	0.0012	0.357	0.1314
4	rs13122619:56345506:C:G	56345506	G	DOMxCHS_LP	768	-0.02199	0.01594	-0.05322	0.009244	-1.38	0.168	0.0012	0.357	0.1314
4	rs13127906:56370368:A:G	56370368	G	DOMxCHS_LP	768	-0.02199	0.01594	-0.05322	0.009244	-1.38	0.168	0.0012	0.357	0.1314
4	rs13133484:56370343:T:C	56370343	C	DOMxCHS_LP	768	-0.02199	0.01594	-0.05322	0.009244	-1.38	0.168	0.0012	0.357	0.1314
4	rs13133579:56326088:A:T	56326088	T	DOMxCHS_LP	768	-0.02199	0.01594	-0.05322	0.009244	-1.38	0.168	0.0012	0.357	0.1314
4	rs13146987:56357795:A:G	56357795	G	DOMxCHS_LP	768	-0.02199	0.01594	-0.05322	0.009244	-1.38	0.168	0.0012	0.357	0.1314
4	rs1522112:56329773:T:C	56329773	C	DOMxCHS_LP	768	-0.02199	0.01594	-0.05322	0.009244	-1.38	0.168	0.0012	0.357	0.1314
4	rs3805151:56337041:T:C	56337041	C	DOMxCHS_LP	768	-0.02199	0.01594	-0.05322	0.009244	-1.38	0.168	0.0012	0.357	0.1314
4	rs3805155:56364009:T:C	56364009	C	DOMxCHS_LP	768	-0.02199	0.01594	-0.05322	0.009244	-1.38	0.168	0.0012	0.357	0.1314
4	rs3828480:56376519:T:C	56376519	C	DOMxCHS_LP	768	-0.02199	0.01594	-0.05322	0.009244	-1.38	0.168	0.0012	0.357	0.1314
4	rs3828482:56376691:G:T	56376691	T	DOMxCHS_LP	768	-0.02199	0.01594	-0.05322	0.009244	-1.38	0.168	0.0012	0.357	0.1314
4	rs4340844:56328856:A:C	56328856	C	DOMxCHS_LP	768	-0.02199	0.01594	-0.05322	0.009244	-1.38	0.168	0.0012	0.357	0.1314
4	rs4864542:56354087:C:G	56354087	G	DOMxCHS_LP	768	-0.02199	0.01594	-0.05322	0.009244	-1.38	0.168	0.0012	0.357	0.1314
4	rs4864544:56381459:C:T	56381459	T	DOMxCHS_LP	768	-0.02199	0.01594	-0.05322	0.009244	-1.38	0.168	0.0012	0.357	0.1314
4	rs4864545:56381830:G:A	56381830	A	DOMxCHS_LP	768	-0.02199	0.01594	-0.05322	0.009244	-1.38	0.168	0.0012	0.357	0.1314
4	rs4864997:56332177:C:G	56332177	G	DOMxCHS_LP	768	-0.02199	0.01594	-0.05322	0.009244	-1.38	0.168	0.0012	0.357	0.1314
4	rs4864999:56342903:A:G	56342903	G	DOMxCHS_LP	768	-0.02199	0.01594	-0.05322	0.009244	-1.38	0.168	0.0012	0.357	0.1314
4	rs6822740:56385089:C:G	56385089	G	DOMxCHS_LP	768	-0.02199	0.01594	-0.05322	0.009244	-1.38	0.168	0.0012	0.357	0.1314
4	rs6838305:56374754:C:T	56374754	T	DOMxCHS_LP	768	-0.02199	0.01594	-0.05322	0.009244	-1.38	0.168	0.0012	0.357	0.1314
4	rs6838499:56374828:C:T	56374828	T	DOMxCHS_LP	768	-0.02199	0.01594	-0.05322	0.009244	-1.38	0.168	0.0012	0.357	0.1314
4	rs6838882:56355477:A:G	56355477	G	DOMxCHS_LP	768	-0.02199	0.01594	-0.05322	0.009244	-1.38	0.168	0.0012	0.357	0.1314
4	rs6847529:56384943:A:T	56384943	T	DOMxCHS_LP	768	-0.02199	0.01594	-0.05322	0.009244	-1.38	0.168	0.0012	0.357	0.1314
4	rs6849433:56372665:A:G	56372665	G	DOMxCHS_LP	768	-0.02199	0.01594	-0.05322	0.009244	-1.38	0.168	0.0012	0.357	0.1314
4	rs6858803:56350701:T:C	56350701	C	DOMxCHS_LP	768	-0.02199	0.01594	-0.05322	0.009244	-1.38	0.168	0.0012	0.357	0.1314
4	rs7677085:56361968:C:T	56361968	T	DOMxCHS_LP	768	-0.02199	0.01594	-0.05322	0.009244	-1.38	0.168	0.0012	0.357	0.1314
4	rs7686261:56366391:A:G	56366391	G	DOMxCHS_LP	768	-0.02199	0.01594	-0.05322	0.009244	-1.38	0.168	0.0012	0.357	0.1314
4	rs9312661:56342326:G:A	56342326	A	DOMxCHS_LP	768	-0.02199	0.01594	-0.05322	0.009244	-1.38	0.168	0.0012	0.357	0.1314
4	rs939823:56353535:C:T	56353535	T	DOMxCHS_LP	768	-0.02199	0.01594	-0.05322	0.009244	-1.38	0.168	0.0012	0.357	0.1314
4	rs960152:56333475:A:C	56333475	C	DOMxCHS_LP	768	-0.02199	0.01594	-0.05322	0.009244	-1.38	0.168	0.0012	0.357	0.1314
4	rs6840236:56289785:T:C	56289785	T	DOMxCHS_LP	764	0.0236	0.01728	-0.01026	0.05747	1.366	0.1723	0.006002	0.4982	0.2379
4	rs3762837:56377365:T:C	56377365	C	DOMxCHS_LP	767	-0.02172	0.01594	-0.05296	0.009527	-1.362	0.1735	0.002401	0.3562	0.1509
4	rs4865004:56381285:G:A	56381285	A	DOMxCHS_LP	767	-0.02172	0.01596	-0.05299	0.009555	-1.361	0.1739	0.002401	0.3592	0.1133
4	rs4864547:56404395:C:T	56404395	T	DOMxCHS_LP	765	-0.02151	0.01596	-0.05279	0.009769	-1.348	0.1781	0.004802	0.3577	0.1311
4	rs55699500:56407079:G:T	56407079	T	DOMxCHS_LP	762	-0.0208	0.01607	-0.0523	0.01071	-1.294	0.1961	0.008403	0.3529	0.2229
4	rs56362210:56407139:C:T	56407139	T	DOMxCHS_LP	762	-0.0208	0.01607	-0.0523	0.01071	-1.294	0.1961	0.008403	0.3529	0.2229
4	rs1464490:56322787:T:C	56322787	C	DOMxCHS_LP	766	-0.01905	0.01598	-0.05036	0.01227	-1.192	0.2336	0.002401	0.358	0.152
4	rs11735267:56347287:C:T	56347287	C	DOMxCHS_LP	763	0.01838	0.01612	-0.01321	0.04997	1.141	0.2544	0.007203	0.3609	0.03467
4	rs11133394:56383238:C:T	56383238	C	DOMxCHS_LP	732	0.01702	0.01675	-0.01581	0.04985	1.016	0.3099	0.04682	0.4181	0.08
4	rs6850524:56381997:C:G	56381997	C	DOMxCHS_LP	732	0.01702	0.01675	-0.01581	0.04985	1.016	0.3099	0.04682	0.4181	0.08
4	rs1965467:56322740:G:A	56322740	G	DOMxCHS_LP	765	0.01531	0.0161	-0.01625	0.04687	0.951	0.3419	0.003601	0.3602	0.03483
4	rs60797008:56388672:A:T	56388672	T	DOMxCHS_LP	755	0.01534	0.01621	-0.01643	0.04712	0.9466	0.3441	0.01921	0.3599	0.02263
4	rs1522107:56380773:A:T	56380773	A	DOMxCHS_LP	764	0.01477	0.01612	-0.01683	0.04636	0.916	0.3599	0.004802	0.3565	0.02807
4	rs1522108:56380733:T:C	56380733	T	DOMxCHS_LP	764	0.01477	0.01612	-0.01683	0.04636	0.916	0.3599	0.004802	0.3565	0.02807
4	rs11133383:56317045:C:T	56317045	C	DOMxCHS_LP	760	0.01412	0.0162	-0.01763	0.04586	0.8716	0.3837	0.009604	0.3624	0.01289
4	rs11133382:56316980:T:G	56316980	T	DOMxCHS_LP	763	0.01405	0.01615	-0.01761	0.0457	0.8699	0.3847	0.006002	0.3569	0.01898
4	rs6824955:56317136:T:G	56317136	T	DOMxCHS_LP	764	0.01387	0.01609	-0.01766	0.0454	0.8623	0.3888	0.004802	0.3583	0.0192
4	rs6834676:56298414:C:G	56298414	C	DOMxCHS_LP	765	0.01364	0.01609	-0.0179	0.04518	0.8475	0.397	0.003601	0.3614	0.0131
4	rs11133379:56306111:G:A	56306111	G	DOMxCHS_LP	767	0.01352	0.01608	-0.01799	0.04504	0.841	0.4006	0.0012	0.3582	0.02357
4	rs11733864:56321530:C:T	56321530	C	DOMxCHS_LP	767	0.01352	0.01608	-0.01799	0.04504	0.841	0.4006	0.0012	0.3582	0.02357
4	rs12643926:56310621:C:T	56310621	C	DOMxCHS_LP	767	0.01352	0.01608	-0.01799	0.04504	0.841	0.4006	0.0012	0.3582	0.02357
4	rs12647034:56310622:A:G	56310622	A	DOMxCHS_LP	767	0.01352	0.01608	-0.01799	0.04504	0.841	0.4006	0.0012	0.3582	0.02357
4	rs13121235:56311947:A:G	56311947	A	DOMxCHS_LP	767	0.01352	0.01608	-0.01799	0.04504	0.841	0.4006	0.0012	0.3582	0.02357
4	rs1522106:56307214:C:A	56307214	C	DOMxCHS_LP	767	0.01352	0.01608	-0.01799	0.04504	0.841	0.4006	0.0012	0.3582	0.02357
4	rs2412646:56318772:T:C	56318772	T	DOMxCHS_LP	767	0.01352	0.01608	-0.01799	0.04504	0.841	0.4006	0.0012	0.3582	0.02357
4	rs2412647:56319105:C:T	56319105	C	DOMxCHS_LP	767	0.01352	0.01608	-0.01799	0.04504	0.841	0.4006	0.0012	0.3582	0.02357
4	rs3736544:56309992:A:G	56309992	A	DOMxCHS_LP	767	0.01352	0.01608	-0.01799	0.04504	0.841	0.4006	0.0012	0.3582	0.02357
4	rs3736545:56310343:C:G	56310343	C	DOMxCHS_LP	767	0.01352	0.01608	-0.01799	0.04504	0.841	0.4006	0.0012	0.3582	0.02357
4	rs3805147:56306730:C:T	56306730	C	DOMxCHS_LP	767	0.01352	0.01608	-0.01799	0.04504	0.841	0.4006	0.0012	0.3582	0.02357
4	rs6811520:56315178:T:C	56315178	T	DOMxCHS_LP	767	0.01352	0.01608	-0.01799	0.04504	0.841	0.4006	0.0012	0.3582	0.02357
4	rs473005:56288125:A:C	56288125	A	DOMxCHS_LP	766	0.01349	0.01609	-0.01804	0.04503	0.8385	0.402	0.002401	0.358	0.01942
4	rs564762:56284631:C:T	56284631	C	DOMxCHS_LP	766	0.01349	0.01609	-0.01804	0.04503	0.8385	0.402	0.002401	0.358	0.01942
4	rs6851838:56420747:A:C	56420747	C	DOMxCHS_LP	767	0.013	0.01607	-0.01849	0.0445	0.8092	0.4186	0.0012	0.3594	0.01964
4	rs10034433:56421176:A:T	56421176	T	DOMxCHS_LP	768	0.01295	0.01606	-0.01852	0.04443	0.8066	0.4202	0	0.3589	0.01954
4	rs10462035:56379178:G:A	56379178	G	DOMxCHS_LP	768	0.01295	0.01606	-0.01852	0.04443	0.8066	0.4202	0	0.3583	0.02387
4	rs11133399:56413831:A:G	56413831	G	DOMxCHS_LP	768	0.01295	0.01606	-0.01852	0.04443	0.8066	0.4202	0	0.3589	0.01954
4	rs11931061	56338793	G	DOMxCHS_LP	768	0.01295	0.01606	-0.01852	0.04443	0.8066	0.4202	0	0.3583	0.02387
4	rs11939815:56358283:T:G	56358283	T	DOMxCHS_LP	768	0.01295	0.01606	-0.01852	0.04443	0.8066	0.4202	0	0.3583	0.02387
4	rs11947476:56339751:T:C	56339751	T	DOMxCHS_LP	768	0.01295	0.01606	-0.01852	0.04443	0.8066	0.4202	0	0.3583	0.02387
4	rs11947623:56349190:C:A	56349190	C	DOMxCHS_LP	768	0.01295	0.01606	-0.01852	0.04443	0.8066	0.4202	0	0.3583	0.02387
4	rs12646078:56368204:T:C	56368204	T	DOMxCHS_LP	768	0.01295	0.01606	-0.01852	0.04443	0.8066	0.4202	0	0.3583	0.02387
4	rs13102385:56345255:T:C	56345255	T	DOMxCHS_LP	768	0.01295	0.01606	-0.01852	0.04443	0.8066	0.4202	0	0.3583	0.02387
4	rs13128582:56328944:C:G	56328944	C	DOMxCHS_LP	768	0.01295	0.01606	-0.01852	0.04443	0.8066	0.4202	0	0.3583	0.02387
4	rs13138697:56363309:G:A	56363309	G	DOMxCHS_LP	768	0.01295	0.01606	-0.01852	0.04443	0.8066	0.4202	0	0.3583	0.02387
4	rs13152650:56357858:T:C	56357858	T	DOMxCHS_LP	768	0.01295	0.01606	-0.01852	0.04443	0.8066	0.4202	0	0.3583	0.02387
4	rs1522110:56380283:C:T	56380283	C	DOMxCHS_LP	768	0.01295	0.01606	-0.01852	0.04443	0.8066	0.4202	0	0.3583	0.02387
4	rs1522111:56329563:T:A	56329563	T	DOMxCHS_LP	768	0.01295	0.01606	-0.01852	0.04443	0.8066	0.4202	0	0.3583	0.02387
4	rs1980273:56367401:C:G	56367401	C	DOMxCHS_LP	768	0.01295	0.01606	-0.01852	0.04443	0.8066	0.4202	0	0.3583	0.02387
4	rs2140077:56338953:A:G	56338953	A	DOMxCHS_LP	768	0.01295	0.01606	-0.01852	0.04443	0.8066	0.4202	0	0.3583	0.02387
4	rs2177127:56379959:A:C	56379959	A	DOMxCHS_LP	768	0.01295	0.01606	-0.01852	0.04443	0.8066	0.4202	0	0.3583	0.02387
4	rs2177129:56365414:C:T	56365414	C	DOMxCHS_LP	768	0.01295	0.01606	-0.01852	0.04443	0.8066	0.4202	0	0.3583	0.02387
4	rs28463765:56412434:C:T	56412434	T	DOMxCHS_LP	768	0.01295	0.01606	-0.01852	0.04443	0.8066	0.4202	0	0.3589	0.01954
4	rs35767091:56346723:G:A	56346723	G	DOMxCHS_LP	768	0.01295	0.01606	-0.01852	0.04443	0.8066	0.4202	0	0.3583	0.02387
4	rs3805152:56359658:C:T	56359658	C	DOMxCHS_LP	768	0.01295	0.01606	-0.01852	0.04443	0.8066	0.4202	0	0.3583	0.02387
4	rs3805154:56363927:C:T	56363927	C	DOMxCHS_LP	768	0.01295	0.01606	-0.01852	0.04443	0.8066	0.4202	0	0.3583	0.02387
4	rs3805157:56364103:A:G	56364103	A	DOMxCHS_LP	768	0.01295	0.01606	-0.01852	0.04443	0.8066	0.4202	0	0.3583	0.02387
4	rs3817444	56375981	A	DOMxCHS_LP	768	0.01295	0.01606	-0.01852	0.04443	0.8066	0.4202	0	0.3577	0.03457
4	rs3828481:56376664:T:C	56376664	T	DOMxCHS_LP	768	0.01295	0.01606	-0.01852	0.04443	0.8066	0.4202	0	0.3583	0.02387
4	rs4371676:56329008:G:A	56329008	G	DOMxCHS_LP	768	0.01295	0.01606	-0.01852	0.04443	0.8066	0.4202	0	0.3583	0.02387
4	rs4580704:56326707:G:C	56326707	G	DOMxCHS_LP	768	0.01295	0.01606	-0.01852	0.04443	0.8066	0.4202	0	0.3583	0.02387
4	rs4864998:56332606:A:G	56332606	A	DOMxCHS_LP	768	0.01295	0.01606	-0.01852	0.04443	0.8066	0.4202	0	0.3583	0.02387
4	rs4865010:56414962:A:C	56414962	C	DOMxCHS_LP	768	0.01295	0.01606	-0.01852	0.04443	0.8066	0.4202	0	0.3589	0.01954
4	rs58894703:56358538:G:A	56358538	G	DOMxCHS_LP	768	0.01295	0.01606	-0.01852	0.04443	0.8066	0.4202	0	0.3583	0.02387
4	rs62303714:56329018:A:T	56329018	A	DOMxCHS_LP	768	0.01295	0.01606	-0.01852	0.04443	0.8066	0.4202	0	0.3583	0.02387
4	rs6810948:56351192:A:G	56351192	A	DOMxCHS_LP	768	0.01295	0.01606	-0.01852	0.04443	0.8066	0.4202	0	0.3583	0.02387
4	rs6817267:56338541:G:A	56338541	G	DOMxCHS_LP	768	0.01295	0.01606	-0.01852	0.04443	0.8066	0.4202	0	0.3583	0.02387
4	rs6819660:56374577:T:G	56374577	T	DOMxCHS_LP	768	0.01295	0.01606	-0.01852	0.04443	0.8066	0.4202	0	0.3583	0.02387
4	rs6824057:56367278:G:C	56367278	G	DOMxCHS_LP	768	0.01295	0.01606	-0.01852	0.04443	0.8066	0.4202	0	0.3583	0.02387
4	rs6837710:56374455:C:T	56374455	C	DOMxCHS_LP	768	0.01295	0.01606	-0.01852	0.04443	0.8066	0.4202	0	0.3583	0.02387
4	rs6846427:56335448:C:G	56335448	C	DOMxCHS_LP	768	0.01295	0.01606	-0.01852	0.04443	0.8066	0.4202	0	0.3583	0.02387
4	rs726967	56421713	A	DOMxCHS_LP	768	0.01295	0.01606	-0.01852	0.04443	0.8066	0.4202	0	0.3589	0.01954
4	rs7667849:56388199:A:G	56388199	G	DOMxCHS_LP	768	0.01295	0.01606	-0.01852	0.04443	0.8066	0.4202	0	0.3583	0.02387
4	rs7668147:56339384:C:T	56339384	C	DOMxCHS_LP	768	0.01295	0.01606	-0.01852	0.04443	0.8066	0.4202	0	0.3583	0.02387
4	rs7670225:56368018:C:T	56368018	C	DOMxCHS_LP	768	0.01295	0.01606	-0.01852	0.04443	0.8066	0.4202	0	0.3583	0.02387
4	rs7677526:56349908:A:T	56349908	A	DOMxCHS_LP	768	0.01295	0.01606	-0.01852	0.04443	0.8066	0.4202	0	0.3583	0.02387
4	rs7684810:56352794:C:T	56352794	C	DOMxCHS_LP	768	0.01295	0.01606	-0.01852	0.04443	0.8066	0.4202	0	0.3583	0.02387
4	rs9312662:56386371:T:C	56386371	C	DOMxCHS_LP	768	0.01295	0.01606	-0.01852	0.04443	0.8066	0.4202	0	0.3583	0.02387
4	rs9997288:56347227:T:C	56347227	T	DOMxCHS_LP	768	0.01295	0.01606	-0.01852	0.04443	0.8066	0.4202	0	0.3583	0.02387
4	rs28448438:56416665:C:T	56416665	T	DOMxCHS_LP	767	0.01272	0.01607	-0.01877	0.04421	0.7918	0.4287	0.0012	0.3594	0.013
4	rs6832769:56298194:G:A	56298194	G	DOMxCHS_LP	761	0.01279	0.01617	-0.01891	0.04448	0.7908	0.4293	0.008403	0.3571	0.02794
4	rs10002541:56395011:T:C	56395011	C	DOMxCHS_LP	767	0.01265	0.01607	-0.01886	0.04415	0.7868	0.4316	0.0012	0.3582	0.02357
4	rs10005989:56405206:C:T	56405206	T	DOMxCHS_LP	767	0.01265	0.01607	-0.01886	0.04415	0.7868	0.4316	0.0012	0.3582	0.02357
4	rs11726609:56400869:T:A	56400869	A	DOMxCHS_LP	767	0.01265	0.01607	-0.01886	0.04415	0.7868	0.4316	0.0012	0.3582	0.02357
4	rs17085889:56402115:G:A	56402115	A	DOMxCHS_LP	767	0.01265	0.01607	-0.01886	0.04415	0.7868	0.4316	0.0012	0.3582	0.02357
4	rs28525309:56406236:G:C	56406236	C	DOMxCHS_LP	767	0.01265	0.01607	-0.01886	0.04415	0.7868	0.4316	0.0012	0.3582	0.02357
4	rs28582059:56408404:G:C	56408404	C	DOMxCHS_LP	767	0.01265	0.01607	-0.01886	0.04415	0.7868	0.4316	0.0012	0.3582	0.02357
4	rs28790098:56398109:C:T	56398109	T	DOMxCHS_LP	767	0.01265	0.01607	-0.01886	0.04415	0.7868	0.4316	0.0012	0.3582	0.02357
4	rs4865008:56410855:T:G	56410855	G	DOMxCHS_LP	767	0.01265	0.01607	-0.01886	0.04415	0.7868	0.4316	0.0012	0.3582	0.02357
4	rs62309727:56391793:G:A	56391793	A	DOMxCHS_LP	767	0.01265	0.01607	-0.01886	0.04415	0.7868	0.4316	0.0012	0.3582	0.02357
4	rs6812042:56396079:G:T	56396079	T	DOMxCHS_LP	767	0.01265	0.01607	-0.01886	0.04415	0.7868	0.4316	0.0012	0.3582	0.02357
4	rs6815516:56399184:A:T	56399184	T	DOMxCHS_LP	767	0.01265	0.01607	-0.01886	0.04415	0.7868	0.4316	0.0012	0.3582	0.02357
4	rs6839788:56393040:G:T	56393040	T	DOMxCHS_LP	767	0.01265	0.01607	-0.01886	0.04415	0.7868	0.4316	0.0012	0.3582	0.02357
4	rs7673908:56394819:A:G	56394819	G	DOMxCHS_LP	767	0.01265	0.01607	-0.01886	0.04415	0.7868	0.4316	0.0012	0.3582	0.02357
4	rs9998038:56397849:C:T	56397849	T	DOMxCHS_LP	767	0.01265	0.01607	-0.01886	0.04415	0.7868	0.4316	0.0012	0.3582	0.02357
4	rs9998146:56397977:C:T	56397977	T	DOMxCHS_LP	767	0.01265	0.01607	-0.01886	0.04415	0.7868	0.4316	0.0012	0.3582	0.02357
4	rs6554286:56400304:T:G	56400304	G	DOMxCHS_LP	765	0.01249	0.0161	-0.01906	0.04405	0.7761	0.4379	0.003601	0.3578	0.02839
4	rs6554280:56374952:A:G	56374952	A	DOMxCHS_LP	765	0.01245	0.0161	-0.0191	0.04401	0.7735	0.4395	0.003601	0.3566	0.0285
4	rs10016506:56396674:G:T	56396674	T	DOMxCHS_LP	766	0.01172	0.01609	-0.01981	0.04326	0.7285	0.4666	0.002401	0.3586	0.02364
4	rs6853192:56409254:T:A	56409254	A	DOMxCHS_LP	766	0.01063	0.01608	-0.0209	0.04215	0.6606	0.509	0.003601	0.3596	0.02881
4	rs28670674:56407103:G:A	56407103	A	DOMxCHS_LP	762	0.01072	0.01633	-0.02129	0.04272	0.6562	0.5119	0.007203	0.3609	0.03467
4	rs146471976:56293324:C:A	56293324	A	DOMxCHS_LP	736	0.01599	0.0252	-0.0334	0.06538	0.6345	0.526	0.04322	0.06336	0.5495
4	rs13140173:56393331:C:T	56393331	T	DOMxCHS_LP	761	-0.009904	0.01593	-0.04113	0.02132	-0.6217	0.5343	0.009604	0.3176	0.09137
4	rs7659095:56401601:G:A	56401601	G	DOMxCHS_LP	766	0.009865	0.01587	-0.02125	0.04098	0.6214	0.5345	0.003601	0.2837	0.393
4	rs13132420:56392813:G:A	56392813	A	DOMxCHS_LP	750	-0.009889	0.01611	-0.04146	0.02168	-0.614	0.5394	0.02761	0.3414	0.1008
4	rs13140590:56414833:A:G	56414833	G	DOMxCHS_LP	766	-0.00922	0.01582	-0.04023	0.02179	-0.5827	0.5603	0.002401	0.3171	0.06585
4	rs62309758:56423069:T:C	56423069	C	DOMxCHS_LP	755	0.009294	0.01595	-0.02197	0.04056	0.5827	0.5603	0.01681	0.2729	0.2181
4	rs12648271:56368122:G:C	56368122	C	DOMxCHS_LP	759	-0.009201	0.01589	-0.04034	0.02194	-0.5791	0.5627	0.012	0.2849	0.3045
4	rs17722979:56346411:G:A	56346411	A	DOMxCHS_LP	767	0.008981	0.01581	-0.02201	0.03997	0.568	0.5702	0.002401	0.2846	0.4431
4	rs62305265:56369641:G:A	56369641	A	DOMxCHS_LP	767	0.008963	0.01579	-0.02199	0.03992	0.5675	0.5705	0.002401	0.284	0.3942
4	rs4864996:56319088:A:C	56319088	C	DOMxCHS_LP	764	-0.008952	0.01587	-0.04006	0.02216	-0.5639	0.573	0.004802	0.3191	0.09326
4	rs11939652:56398709:T:A	56398709	A	DOMxCHS_LP	765	-0.0089	0.01584	-0.03994	0.02214	-0.5619	0.5743	0.004802	0.3166	0.09161
4	rs13107810:56408410:C:A	56408410	A	DOMxCHS_LP	765	-0.0089	0.01584	-0.03994	0.02214	-0.5619	0.5743	0.004802	0.3166	0.09161
4	rs2035691:56395953:C:T	56395953	T	DOMxCHS_LP	765	-0.0089	0.01584	-0.03994	0.02214	-0.5619	0.5743	0.004802	0.3166	0.09161
4	rs2035692:56394968:T:A	56394968	A	DOMxCHS_LP	765	-0.0089	0.01584	-0.03994	0.02214	-0.5619	0.5743	0.004802	0.3166	0.09161
4	rs4507426:56395554:T:C	56395554	C	DOMxCHS_LP	765	-0.0089	0.01584	-0.03994	0.02214	-0.5619	0.5743	0.004802	0.3166	0.09161
4	rs7667741:56410788:T:C	56410788	C	DOMxCHS_LP	765	-0.0089	0.01584	-0.03994	0.02214	-0.5619	0.5743	0.003601	0.3175	0.07776
4	rs12501746:56303605:C:T	56303605	T	DOMxCHS_LP	766	-0.008876	0.01584	-0.03993	0.02218	-0.5602	0.5755	0.002401	0.3183	0.09293
4	rs11932712:56302590:C:T	56302590	T	DOMxCHS_LP	767	-0.00881	0.01583	-0.03985	0.02223	-0.5564	0.5781	0.0012	0.3185	0.09358
4	rs12512737:56321105:A:T	56321105	T	DOMxCHS_LP	767	-0.00881	0.01583	-0.03985	0.02223	-0.5564	0.5781	0.0012	0.3185	0.09358
4	rs13125984:56321269:G:A	56321269	A	DOMxCHS_LP	767	-0.00881	0.01583	-0.03985	0.02223	-0.5564	0.5781	0.0012	0.3185	0.09358
4	rs13128180:56286188:G:T	56286188	T	DOMxCHS_LP	767	-0.00881	0.01583	-0.03985	0.02223	-0.5564	0.5781	0.0012	0.3185	0.09358
4	rs2412648:56321067:T:G	56321067	G	DOMxCHS_LP	767	-0.00881	0.01583	-0.03985	0.02223	-0.5564	0.5781	0.0012	0.3185	0.09358
4	rs79658500:56364754:T:C	56364754	C	DOMxCHS_LP	766	0.008713	0.01581	-0.02228	0.03971	0.5509	0.5818	0.003601	0.2843	0.3947
4	rs13115570:56387392:T:G	56387392	G	DOMxCHS_LP	764	-0.008567	0.01584	-0.03961	0.02248	-0.5409	0.5888	0.006002	0.3164	0.07721
4	rs11133389:56352885:C:T	56352885	T	DOMxCHS_LP	766	-0.008528	0.01582	-0.03954	0.02248	-0.539	0.5901	0.003601	0.3169	0.09214
4	rs11939580:56383352:C:T	56383352	T	DOMxCHS_LP	766	-0.008528	0.01582	-0.03954	0.02248	-0.539	0.5901	0.003601	0.3169	0.09214
4	rs12508367:56375609:T:C	56375609	C	DOMxCHS_LP	766	-0.008528	0.01582	-0.03954	0.02248	-0.539	0.5901	0.003601	0.3169	0.09214
4	rs12510275:56382715:T:C	56382715	C	DOMxCHS_LP	766	-0.008528	0.01582	-0.03954	0.02248	-0.539	0.5901	0.003601	0.3169	0.09214
4	rs12510327:56382911:T:C	56382911	C	DOMxCHS_LP	766	-0.008528	0.01582	-0.03954	0.02248	-0.539	0.5901	0.003601	0.3169	0.09214
4	rs12649507:56380484:G:A	56380484	A	DOMxCHS_LP	766	-0.008528	0.01582	-0.03954	0.02248	-0.539	0.5901	0.003601	0.3169	0.09214
4	rs13124436:56368671:G:A	56368671	A	DOMxCHS_LP	766	-0.008528	0.01582	-0.03954	0.02248	-0.539	0.5901	0.003601	0.3169	0.09214
4	rs13128179:56358887:C:T	56358887	T	DOMxCHS_LP	766	-0.008528	0.01582	-0.03954	0.02248	-0.539	0.5901	0.003601	0.3169	0.09214
4	rs2272073:56376344:C:T	56376344	T	DOMxCHS_LP	766	-0.008528	0.01582	-0.03954	0.02248	-0.539	0.5901	0.003601	0.3169	0.09214
4	rs3805153:56359724:T:G	56359724	G	DOMxCHS_LP	766	-0.008528	0.01582	-0.03954	0.02248	-0.539	0.5901	0.003601	0.3169	0.09214
4	rs4865003:56380969:T:G	56380969	G	DOMxCHS_LP	766	-0.008528	0.01582	-0.03954	0.02248	-0.539	0.5901	0.003601	0.3169	0.09214
4	rs6830409:56388396:T:C	56388396	C	DOMxCHS_LP	766	-0.008528	0.01582	-0.03954	0.02248	-0.539	0.5901	0.003601	0.3169	0.09214
4	rs6843997:56375149:C:T	56375149	T	DOMxCHS_LP	766	-0.008528	0.01582	-0.03954	0.02248	-0.539	0.5901	0.003601	0.3169	0.09214
4	rs7658446:56361429:T:C	56361429	C	DOMxCHS_LP	766	-0.008528	0.01582	-0.03954	0.02248	-0.539	0.5901	0.003601	0.3169	0.09214
4	rs7699867:56349885:C:A	56349885	A	DOMxCHS_LP	766	-0.008528	0.01582	-0.03954	0.02248	-0.539	0.5901	0.003601	0.3169	0.09214
4	rs1522114:56356062:A:G	56356062	G	DOMxCHS_LP	762	-0.008549	0.01587	-0.03965	0.02256	-0.5387	0.5903	0.008403	0.3184	0.1086
4	rs4864543:56356395:C:T	56356395	T	DOMxCHS_LP	762	-0.008549	0.01587	-0.03965	0.02256	-0.5387	0.5903	0.008403	0.3184	0.1086
4	rs4865001:56356343:T:C	56356343	C	DOMxCHS_LP	762	-0.008549	0.01587	-0.03965	0.02256	-0.5387	0.5903	0.008403	0.3184	0.1086
4	rs6825774:56357317:G:T	56357317	T	DOMxCHS_LP	762	-0.008549	0.01587	-0.03965	0.02256	-0.5387	0.5903	0.008403	0.3184	0.1086
4	rs67963898:56341687:A:G	56341687	G	DOMxCHS_LP	767	0.008188	0.0158	-0.02278	0.03916	0.5182	0.6045	0.002401	0.284	0.3942
4	rs11133385:56326652:G:A	56326652	A	DOMxCHS_LP	768	-0.008161	0.01581	-0.03914	0.02282	-0.5163	0.6058	0.0012	0.3179	0.07921
4	rs1021306:56395944:T:G	56395944	T	DOMxCHS_LP	768	0.008014	0.01579	-0.02294	0.03897	0.5074	0.612	0.0012	0.2843	0.443
4	rs1021307:56395714:G:A	56395714	G	DOMxCHS_LP	768	0.008014	0.01579	-0.02294	0.03897	0.5074	0.612	0.0012	0.2843	0.443
4	rs10462033:56377719:G:T	56377719	T	DOMxCHS_LP	768	0.008014	0.01579	-0.02294	0.03897	0.5074	0.612	0.0012	0.2843	0.443
4	rs1048004:56300209:C:A	56300209	A	DOMxCHS_LP	768	0.008014	0.01579	-0.02294	0.03897	0.5074	0.612	0	0.2845	0.4439
4	rs10866424:56419574:T:G	56419574	T	DOMxCHS_LP	768	0.008014	0.01579	-0.02294	0.03897	0.5074	0.612	0	0.2839	0.3954
4	rs11240:56319350:C:G	56319350	G	DOMxCHS_LP	768	0.008014	0.01579	-0.02294	0.03897	0.5074	0.612	0	0.2845	0.4439
4	rs12505265:56412143:C:G	56412143	C	DOMxCHS_LP	768	0.008014	0.01579	-0.02294	0.03897	0.5074	0.612	0	0.2839	0.3954
4	rs12509047:56411412:T:A	56411412	T	DOMxCHS_LP	768	0.008014	0.01579	-0.02294	0.03897	0.5074	0.612	0	0.2839	0.3954
4	rs13134079:56408188:A:G	56408188	A	DOMxCHS_LP	768	0.008014	0.01579	-0.02294	0.03897	0.5074	0.612	0.0012	0.2843	0.443
4	rs1522109:56380570:A:G	56380570	G	DOMxCHS_LP	768	0.008014	0.01579	-0.02294	0.03897	0.5074	0.612	0.0012	0.2843	0.443
4	rs1546004:56387779:C:T	56387779	C	DOMxCHS_LP	768	0.008014	0.01579	-0.02294	0.03897	0.5074	0.612	0.0012	0.2843	0.443
4	rs17721215:56303787:T:C	56303787	C	DOMxCHS_LP	768	0.008014	0.01579	-0.02294	0.03897	0.5074	0.612	0	0.2845	0.4439
4	rs17722870:56344686:A:G	56344686	G	DOMxCHS_LP	768	0.008014	0.01579	-0.02294	0.03897	0.5074	0.612	0.0012	0.2843	0.443
4	rs17779627:56349942:T:C	56349942	C	DOMxCHS_LP	768	0.008014	0.01579	-0.02294	0.03897	0.5074	0.612	0.0012	0.2843	0.443
4	rs1801260	56301369	G	DOMxCHS_LP	768	0.008014	0.01579	-0.02294	0.03897	0.5074	0.612	0	0.2845	0.4439
4	rs1906676:56415344:A:G	56415344	A	DOMxCHS_LP	768	0.008014	0.01579	-0.02294	0.03897	0.5074	0.612	0	0.2839	0.3954
4	rs1915905:56378548:T:G	56378548	G	DOMxCHS_LP	768	0.008014	0.01579	-0.02294	0.03897	0.5074	0.612	0.0012	0.2843	0.443
4	rs1979604:56418755:A:C	56418755	A	DOMxCHS_LP	768	0.008014	0.01579	-0.02294	0.03897	0.5074	0.612	0	0.2839	0.3954
4	rs2070062:56355598:A:C	56355598	C	DOMxCHS_LP	768	0.008014	0.01579	-0.02294	0.03897	0.5074	0.612	0.0012	0.2843	0.443
4	rs3805156:56364092:G:A	56364092	A	DOMxCHS_LP	768	0.008014	0.01579	-0.02294	0.03897	0.5074	0.612	0.0012	0.2843	0.443
4	rs4865006:56392279:C:T	56392279	C	DOMxCHS_LP	768	0.008014	0.01579	-0.02294	0.03897	0.5074	0.612	0.0012	0.2843	0.443
4	rs4865012:56420786:C:T	56420786	C	DOMxCHS_LP	768	0.008014	0.01579	-0.02294	0.03897	0.5074	0.612	0	0.2839	0.3954
4	rs55729020:56357848:C:G	56357848	G	DOMxCHS_LP	768	0.008014	0.01579	-0.02294	0.03897	0.5074	0.612	0.0012	0.2843	0.443
4	rs55885973:56346221:C:A	56346221	A	DOMxCHS_LP	768	0.008014	0.01579	-0.02294	0.03897	0.5074	0.612	0.0012	0.2843	0.443
4	rs56196624:56366507:T:C	56366507	C	DOMxCHS_LP	768	0.008014	0.01579	-0.02294	0.03897	0.5074	0.612	0.0012	0.2843	0.443
4	rs57338268:56351180:G:A	56351180	A	DOMxCHS_LP	768	0.008014	0.01579	-0.02294	0.03897	0.5074	0.612	0.0012	0.2843	0.443
4	rs58476959:56362401:A:C	56362401	C	DOMxCHS_LP	768	0.008014	0.01579	-0.02294	0.03897	0.5074	0.612	0.0012	0.2843	0.443
4	rs62303686:56293659:G:A	56293659	A	DOMxCHS_LP	768	0.008014	0.01579	-0.02294	0.03897	0.5074	0.612	0	0.2845	0.4439
4	rs62303711:56324492:G:C	56324492	C	DOMxCHS_LP	768	0.008014	0.01579	-0.02294	0.03897	0.5074	0.612	0	0.2845	0.4439
4	rs62303713:56327743:G:A	56327743	A	DOMxCHS_LP	768	0.008014	0.01579	-0.02294	0.03897	0.5074	0.612	0.0012	0.2843	0.443
4	rs62303718:56342937:T:C	56342937	C	DOMxCHS_LP	768	0.008014	0.01579	-0.02294	0.03897	0.5074	0.612	0.0012	0.2843	0.443
4	rs62303726:56356582:A:G	56356582	G	DOMxCHS_LP	768	0.008014	0.01579	-0.02294	0.03897	0.5074	0.612	0.0012	0.2843	0.443
4	rs62303731:56365834:C:T	56365834	T	DOMxCHS_LP	768	0.008014	0.01579	-0.02294	0.03897	0.5074	0.612	0.0012	0.2843	0.443
4	rs62303732:56366035:A:G	56366035	G	DOMxCHS_LP	768	0.008014	0.01579	-0.02294	0.03897	0.5074	0.612	0.0012	0.2843	0.443
4	rs62305264:56369135:A:G	56369135	G	DOMxCHS_LP	768	0.008014	0.01579	-0.02294	0.03897	0.5074	0.612	0.0012	0.2843	0.443
4	rs62305266:56371283:C:T	56371283	T	DOMxCHS_LP	768	0.008014	0.01579	-0.02294	0.03897	0.5074	0.612	0.0012	0.2843	0.443
4	rs62305267:56372979:C:T	56372979	T	DOMxCHS_LP	768	0.008014	0.01579	-0.02294	0.03897	0.5074	0.612	0.0012	0.2843	0.443
4	rs62305268:56373158:T:A	56373158	A	DOMxCHS_LP	768	0.008014	0.01579	-0.02294	0.03897	0.5074	0.612	0.0012	0.2843	0.443
4	rs62305270:56374009:G:C	56374009	C	DOMxCHS_LP	768	0.008014	0.01579	-0.02294	0.03897	0.5074	0.612	0.0012	0.2843	0.443
4	rs62305271:56375882:G:T	56375882	T	DOMxCHS_LP	768	0.008014	0.01579	-0.02294	0.03897	0.5074	0.612	0.0012	0.2843	0.443
4	rs6554282:56385979:A:G	56385979	A	DOMxCHS_LP	768	0.008014	0.01579	-0.02294	0.03897	0.5074	0.612	0.0012	0.2843	0.443
4	rs6554283:56387220:G:T	56387220	G	DOMxCHS_LP	768	0.008014	0.01579	-0.02294	0.03897	0.5074	0.612	0.0012	0.2843	0.443
4	rs6554284:56399899:A:G	56399899	A	DOMxCHS_LP	768	0.008014	0.01579	-0.02294	0.03897	0.5074	0.612	0.0012	0.2843	0.443
4	rs6554285:56400120:C:T	56400120	C	DOMxCHS_LP	768	0.008014	0.01579	-0.02294	0.03897	0.5074	0.612	0.0012	0.2843	0.443
4	rs6554287:56416879:C:T	56416879	C	DOMxCHS_LP	768	0.008014	0.01579	-0.02294	0.03897	0.5074	0.612	0	0.2839	0.3954
4	rs73236142:56312310:G:T	56312310	T	DOMxCHS_LP	768	0.008014	0.01579	-0.02294	0.03897	0.5074	0.612	0	0.2845	0.4439
4	rs7660668:56401697:C:G	56401697	C	DOMxCHS_LP	768	0.008014	0.01579	-0.02294	0.03897	0.5074	0.612	0.0012	0.2843	0.443
4	rs7666895:56387478:T:C	56387478	T	DOMxCHS_LP	768	0.008014	0.01579	-0.02294	0.03897	0.5074	0.612	0.0012	0.2843	0.443
4	rs7676245:56321317:G:A	56321317	A	DOMxCHS_LP	768	0.008014	0.01579	-0.02294	0.03897	0.5074	0.612	0	0.2845	0.4439
4	rs7681414:56375057:C:G	56375057	G	DOMxCHS_LP	768	0.008014	0.01579	-0.02294	0.03897	0.5074	0.612	0.0012	0.2843	0.443
4	rs7697067:56403380:A:T	56403380	A	DOMxCHS_LP	768	0.008014	0.01579	-0.02294	0.03897	0.5074	0.612	0.0012	0.2843	0.443
4	rs7698022:56407347:G:T	56407347	G	DOMxCHS_LP	768	0.008014	0.01579	-0.02294	0.03897	0.5074	0.612	0.0012	0.2843	0.443
4	rs1979605:56418873:A:G	56418873	A	DOMxCHS_LP	767	0.007936	0.0158	-0.02303	0.0389	0.5023	0.6156	0.0012	0.2837	0.3938
4	rs12504300:56348527:G:C	56348527	C	DOMxCHS_LP	765	-0.007951	0.01584	-0.039	0.0231	-0.5018	0.616	0.004802	0.2859	0.3071
4	rs56056791:56328468:T:C	56328468	C	DOMxCHS_LP	767	0.007779	0.01581	-0.02322	0.03877	0.4919	0.6229	0.002401	0.284	0.3942
4	rs62303691:56308252:C:T	56308252	T	DOMxCHS_LP	766	0.007728	0.01582	-0.02329	0.03874	0.4884	0.6254	0.002401	0.284	0.3942
4	rs62303692:56311447:C:T	56311447	T	DOMxCHS_LP	766	0.007728	0.01582	-0.02329	0.03874	0.4884	0.6254	0.002401	0.284	0.3942
4	rs62303708:56313484:T:C	56313484	C	DOMxCHS_LP	766	0.007728	0.01582	-0.02329	0.03874	0.4884	0.6254	0.002401	0.284	0.3942
4	rs62303712:56326651:C:T	56326651	T	DOMxCHS_LP	766	0.007728	0.01582	-0.02329	0.03874	0.4884	0.6254	0.003601	0.2837	0.393
4	rs62303722:56348243:A:C	56348243	C	DOMxCHS_LP	766	0.007728	0.01582	-0.02329	0.03874	0.4884	0.6254	0.003601	0.2837	0.393
4	rs62303728:56361929:G:A	56361929	A	DOMxCHS_LP	766	0.007728	0.01582	-0.02329	0.03874	0.4884	0.6254	0.003601	0.2837	0.393
4	rs62303730:56365115:A:C	56365115	C	DOMxCHS_LP	766	0.007728	0.01582	-0.02329	0.03874	0.4884	0.6254	0.003601	0.2837	0.393
4	rs62309729:56402846:A:G	56402846	G	DOMxCHS_LP	766	0.007728	0.01582	-0.02329	0.03874	0.4884	0.6254	0.003601	0.2837	0.393
4	rs6802:56292101:A:T	56292101	T	DOMxCHS_LP	766	0.007728	0.01582	-0.02329	0.03874	0.4884	0.6254	0.002401	0.284	0.3942
4	rs73236140:56306216:T:C	56306216	C	DOMxCHS_LP	766	0.007728	0.01582	-0.02329	0.03874	0.4884	0.6254	0.002401	0.284	0.3942
4	rs41324951:56288743:C:G	56288743	G	DOMxCHS_LP	765	0.007703	0.01583	-0.02333	0.03874	0.4865	0.6268	0.003601	0.2837	0.393
4	rs17721497:56311248:A:T	56311248	T	DOMxCHS_LP	764	0.007377	0.01584	-0.02366	0.03842	0.4658	0.6415	0.006002	0.285	0.4426
4	rs6849474:56318462:G:A	56318462	A	DOMxCHS_LP	765	-0.00695	0.01591	-0.03813	0.02423	-0.4368	0.6623	0.003601	0.3187	0.09305
4	rs56055342:56407095:T:C	56407095	C	DOMxCHS_LP	760	-0.006879	0.016	-0.03823	0.02447	-0.43	0.6673	0.0108	0.3125	0.1684
4	rs1488941:56383966:T:C	56383966	C	DOMxCHS_LP	732	-0.006627	0.0162	-0.03839	0.02513	-0.409	0.6827	0.04802	0.2182	0.5318
4	rs10462028:56298300:G:A	56298300	A	DOMxCHS_LP	768	-0.00641	0.01584	-0.03746	0.02464	-0.4047	0.6858	0	0.3235	0.476
4	rs57826934:56323379:C:T	56323379	T	DOMxCHS_LP	768	-0.00641	0.01584	-0.03746	0.02464	-0.4047	0.6858	0	0.3235	0.476
4	rs6843722:56331332:A:C	56331332	C	DOMxCHS_LP	761	-0.006009	0.0159	-0.03717	0.02515	-0.378	0.7055	0.009604	0.32	0.09322
4	rs55869433:56410937:C:T	56410937	T	DOMxCHS_LP	744	-0.003923	0.01611	-0.03551	0.02766	-0.2435	0.8077	0.03361	0.2081	0.1989
4	rs62309730:56407697:A:G	56407697	G	DOMxCHS_LP	744	-0.003923	0.01611	-0.03551	0.02766	-0.2435	0.8077	0.03481	0.2083	0.1992
4	rs62309728:56396815:G:A	56396815	A	DOMxCHS_LP	743	-0.003913	0.01612	-0.03551	0.02769	-0.2427	0.8083	0.03601	0.208	0.1978
4	rs62303724:56351281:C:A	56351281	A	DOMxCHS_LP	740	-0.003799	0.01618	-0.03551	0.02791	-0.2348	0.8144	0.03962	0.205	0.1599
4	rs62305269:56373404:C:A	56373404	A	DOMxCHS_LP	742	-0.003627	0.01615	-0.03527	0.02802	-0.2246	0.8223	0.03721	0.2064	0.1602
4	rs73236149:56373474:C:T	56373474	T	DOMxCHS_LP	742	-0.003627	0.01615	-0.03527	0.02802	-0.2246	0.8223	0.03721	0.2064	0.1602
4	rs3792603:56302058:A:G	56302058	G	DOMxCHS_LP	740	-0.002603	0.01625	-0.03446	0.02925	-0.1601	0.8728	0.03842	0.2054	0.1932
4	rs62303690:56306005:T:C	56306005	C	DOMxCHS_LP	740	-0.002603	0.01625	-0.03446	0.02925	-0.1601	0.8728	0.03842	0.2054	0.1932
4	rs62303709:56315182:C:T	56315182	T	DOMxCHS_LP	740	-0.002603	0.01625	-0.03446	0.02925	-0.1601	0.8728	0.03842	0.2054	0.1932
4	rs62303715:56333060:A:C	56333060	C	DOMxCHS_LP	740	-0.002603	0.01625	-0.03446	0.02925	-0.1601	0.8728	0.03962	0.205	0.1599
4	rs62303716:56334252:C:A	56334252	A	DOMxCHS_LP	740	-0.002603	0.01625	-0.03446	0.02925	-0.1601	0.8728	0.03962	0.205	0.1599
4	rs6828474:56341907:A:T	56341907	T	DOMxCHS_LP	740	-0.002603	0.01625	-0.03446	0.02925	-0.1601	0.8728	0.03962	0.205	0.1599
4	rs62303685:56285082:C:G	56285082	G	DOMxCHS_LP	739	-0.002576	0.01626	-0.03445	0.0293	-0.1584	0.8742	0.03962	0.2056	0.1935
4	rs10529258:56412869:G:A	56412869	A	DOMxCHS_LP	757	0.002315	0.01608	-0.02921	0.03384	0.1439	0.8856	0.01441	0.2801	0.3414
4	rs115635692:56412873:A:C	56412873	C	DOMxCHS_LP	757	0.002315	0.01608	-0.02921	0.03384	0.1439	0.8856	0.01441	0.2801	0.3414
4	rs116135676:56412874:G:T	56412874	T	DOMxCHS_LP	757	0.002315	0.01608	-0.02921	0.03384	0.1439	0.8856	0.01441	0.2801	0.3414

## Sheet: recessive
CHR	SNP	BP	A1	TEST	NMISS	BETA	SE	L95	U95	STAT	P	F_MISS	MAF	HWE
4	rs6828454:56290496:C:T	56290496	C	RECxCHS_LP	766	0.06599	0.01912	0.02852	0.1035	3.452	0.0005878	0.003601	0.459	0.2636
4	rs6858684:56289778:C:T	56289778	C	RECxCHS_LP	764	0.06562	0.01915	0.02809	0.1032	3.427	0.0006435	0.006002	0.4589	0.2344
4	rs10049561:56292790:A:G	56292790	A	RECxCHS_LP	767	0.06439	0.01909	0.02698	0.1018	3.374	0.0007796	0.002401	0.4591	0.2946
4	rs11732723:56290558:C:T	56290558	C	RECxCHS_LP	767	0.06407	0.0191	0.02662	0.1015	3.354	0.0008374	0.002401	0.4597	0.236
4	rs6858749:56290437:T:C	56290437	T	RECxCHS_LP	767	0.06407	0.0191	0.02662	0.1015	3.354	0.0008374	0.002401	0.4597	0.236
4	rs3749473:56294628:T:C	56294628	T	RECxCHS_LP	765	0.06305	0.01903	0.02575	0.1004	3.313	0.0009676	0.004802	0.4596	0.209
4	rs6810483:56290573:T:C	56290573	T	RECxCHS_LP	766	0.0463	0.01814	0.01075	0.08185	2.553	0.01087	0.003601	0.4982	0.2672
4	rs6840236:56289785:T:C	56289785	T	RECxCHS_LP	764	0.046	0.01816	0.0104	0.0816	2.532	0.01153	0.006002	0.4982	0.2379
4	rs3749472:56294032:A:G	56294032	A	RECxCHS_LP	765	0.04338	0.01807	0.007957	0.0788	2.4	0.01662	0.004802	0.4982	0.2663
4	rs1488941:56383966:T:C	56383966	C	RECxCHS_LP	732	0.07617	0.03936	-0.0009873	0.1533	1.935	0.05339	0.04802	0.2182	0.5318
4	rs55869433:56410937:C:T	56410937	T	RECxCHS_LP	744	0.0751	0.03911	-0.001558	0.1518	1.92	0.05523	0.03361	0.2081	0.1989
4	rs62309730:56407697:A:G	56407697	G	RECxCHS_LP	744	0.0751	0.03911	-0.001558	0.1518	1.92	0.05523	0.03481	0.2083	0.1992
4	rs62309728:56396815:G:A	56396815	A	RECxCHS_LP	743	0.0751	0.03914	-0.001599	0.1518	1.919	0.05536	0.03601	0.208	0.1978
4	rs62305269:56373404:C:A	56373404	A	RECxCHS_LP	742	0.07509	0.03916	-0.001664	0.1518	1.917	0.05556	0.03721	0.2064	0.1602
4	rs73236149:56373474:C:T	56373474	T	RECxCHS_LP	742	0.07509	0.03916	-0.001664	0.1518	1.917	0.05556	0.03721	0.2064	0.1602
4	rs62303724:56351281:C:A	56351281	A	RECxCHS_LP	740	0.0739	0.03961	-0.003735	0.1515	1.866	0.06248	0.03962	0.205	0.1599
4	rs3792603:56302058:A:G	56302058	G	RECxCHS_LP	740	0.07337	0.03961	-0.004267	0.151	1.852	0.06439	0.03842	0.2054	0.1932
4	rs62303690:56306005:T:C	56306005	C	RECxCHS_LP	740	0.07337	0.03961	-0.004267	0.151	1.852	0.06439	0.03842	0.2054	0.1932
4	rs62303709:56315182:C:T	56315182	T	RECxCHS_LP	740	0.07337	0.03961	-0.004267	0.151	1.852	0.06439	0.03842	0.2054	0.1932
4	rs62303715:56333060:A:C	56333060	C	RECxCHS_LP	740	0.07337	0.03961	-0.004267	0.151	1.852	0.06439	0.03962	0.205	0.1599
4	rs62303716:56334252:C:A	56334252	A	RECxCHS_LP	740	0.07337	0.03961	-0.004267	0.151	1.852	0.06439	0.03962	0.205	0.1599
4	rs6828474:56341907:A:T	56341907	T	RECxCHS_LP	740	0.07337	0.03961	-0.004267	0.151	1.852	0.06439	0.03962	0.205	0.1599
4	rs62303685:56285082:C:G	56285082	G	RECxCHS_LP	739	0.07339	0.03964	-0.004294	0.1511	1.852	0.06448	0.03962	0.2056	0.1935
4	rs17722979:56346411:G:A	56346411	A	RECxCHS_LP	767	0.04655	0.02964	-0.01153	0.1046	1.571	0.1166	0.002401	0.2846	0.4431
4	rs62309758:56423069:T:C	56423069	C	RECxCHS_LP	755	0.04736	0.0303	-0.01202	0.1067	1.563	0.1184	0.01681	0.2729	0.2181
4	rs56056791:56328468:T:C	56328468	C	RECxCHS_LP	767	0.04613	0.02966	-0.012	0.1043	1.555	0.1203	0.002401	0.284	0.3942
4	rs62303691:56308252:C:T	56308252	T	RECxCHS_LP	766	0.04616	0.02968	-0.01201	0.1043	1.555	0.1203	0.002401	0.284	0.3942
4	rs62303692:56311447:C:T	56311447	T	RECxCHS_LP	766	0.04616	0.02968	-0.01201	0.1043	1.555	0.1203	0.002401	0.284	0.3942
4	rs62303708:56313484:T:C	56313484	C	RECxCHS_LP	766	0.04616	0.02968	-0.01201	0.1043	1.555	0.1203	0.002401	0.284	0.3942
4	rs62303712:56326651:C:T	56326651	T	RECxCHS_LP	766	0.04616	0.02968	-0.01201	0.1043	1.555	0.1203	0.003601	0.2837	0.393
4	rs62303722:56348243:A:C	56348243	C	RECxCHS_LP	766	0.04616	0.02968	-0.01201	0.1043	1.555	0.1203	0.003601	0.2837	0.393
4	rs62303728:56361929:G:A	56361929	A	RECxCHS_LP	766	0.04616	0.02968	-0.01201	0.1043	1.555	0.1203	0.003601	0.2837	0.393
4	rs62303730:56365115:A:C	56365115	C	RECxCHS_LP	766	0.04616	0.02968	-0.01201	0.1043	1.555	0.1203	0.003601	0.2837	0.393
4	rs62309729:56402846:A:G	56402846	G	RECxCHS_LP	766	0.04616	0.02968	-0.01201	0.1043	1.555	0.1203	0.003601	0.2837	0.393
4	rs6802:56292101:A:T	56292101	T	RECxCHS_LP	766	0.04616	0.02968	-0.01201	0.1043	1.555	0.1203	0.002401	0.284	0.3942
4	rs73236140:56306216:T:C	56306216	C	RECxCHS_LP	766	0.04616	0.02968	-0.01201	0.1043	1.555	0.1203	0.002401	0.284	0.3942
4	rs41324951:56288743:C:G	56288743	G	RECxCHS_LP	765	0.04617	0.02969	-0.01203	0.1044	1.555	0.1204	0.003601	0.2837	0.393
4	rs1021306:56395944:T:G	56395944	T	RECxCHS_LP	768	0.04597	0.02964	-0.01213	0.1041	1.551	0.1213	0.0012	0.2843	0.443
4	rs1021307:56395714:G:A	56395714	G	RECxCHS_LP	768	0.04597	0.02964	-0.01213	0.1041	1.551	0.1213	0.0012	0.2843	0.443
4	rs10462033:56377719:G:T	56377719	T	RECxCHS_LP	768	0.04597	0.02964	-0.01213	0.1041	1.551	0.1213	0.0012	0.2843	0.443
4	rs1048004:56300209:C:A	56300209	A	RECxCHS_LP	768	0.04597	0.02964	-0.01213	0.1041	1.551	0.1213	0	0.2845	0.4439
4	rs10866424:56419574:T:G	56419574	T	RECxCHS_LP	768	0.04597	0.02964	-0.01213	0.1041	1.551	0.1213	0	0.2839	0.3954
4	rs11240:56319350:C:G	56319350	G	RECxCHS_LP	768	0.04597	0.02964	-0.01213	0.1041	1.551	0.1213	0	0.2845	0.4439
4	rs12505265:56412143:C:G	56412143	C	RECxCHS_LP	768	0.04597	0.02964	-0.01213	0.1041	1.551	0.1213	0	0.2839	0.3954
4	rs12509047:56411412:T:A	56411412	T	RECxCHS_LP	768	0.04597	0.02964	-0.01213	0.1041	1.551	0.1213	0	0.2839	0.3954
4	rs13134079:56408188:A:G	56408188	A	RECxCHS_LP	768	0.04597	0.02964	-0.01213	0.1041	1.551	0.1213	0.0012	0.2843	0.443
4	rs1522109:56380570:A:G	56380570	G	RECxCHS_LP	768	0.04597	0.02964	-0.01213	0.1041	1.551	0.1213	0.0012	0.2843	0.443
4	rs1546004:56387779:C:T	56387779	C	RECxCHS_LP	768	0.04597	0.02964	-0.01213	0.1041	1.551	0.1213	0.0012	0.2843	0.443
4	rs17721215:56303787:T:C	56303787	C	RECxCHS_LP	768	0.04597	0.02964	-0.01213	0.1041	1.551	0.1213	0	0.2845	0.4439
4	rs17722870:56344686:A:G	56344686	G	RECxCHS_LP	768	0.04597	0.02964	-0.01213	0.1041	1.551	0.1213	0.0012	0.2843	0.443
4	rs17779627:56349942:T:C	56349942	C	RECxCHS_LP	768	0.04597	0.02964	-0.01213	0.1041	1.551	0.1213	0.0012	0.2843	0.443
4	rs1801260	56301369	G	RECxCHS_LP	768	0.04597	0.02964	-0.01213	0.1041	1.551	0.1213	0	0.2845	0.4439
4	rs1906676:56415344:A:G	56415344	A	RECxCHS_LP	768	0.04597	0.02964	-0.01213	0.1041	1.551	0.1213	0	0.2839	0.3954
4	rs1915905:56378548:T:G	56378548	G	RECxCHS_LP	768	0.04597	0.02964	-0.01213	0.1041	1.551	0.1213	0.0012	0.2843	0.443
4	rs1979604:56418755:A:C	56418755	A	RECxCHS_LP	768	0.04597	0.02964	-0.01213	0.1041	1.551	0.1213	0	0.2839	0.3954
4	rs2070062:56355598:A:C	56355598	C	RECxCHS_LP	768	0.04597	0.02964	-0.01213	0.1041	1.551	0.1213	0.0012	0.2843	0.443
4	rs3805156:56364092:G:A	56364092	A	RECxCHS_LP	768	0.04597	0.02964	-0.01213	0.1041	1.551	0.1213	0.0012	0.2843	0.443
4	rs4865006:56392279:C:T	56392279	C	RECxCHS_LP	768	0.04597	0.02964	-0.01213	0.1041	1.551	0.1213	0.0012	0.2843	0.443
4	rs4865012:56420786:C:T	56420786	C	RECxCHS_LP	768	0.04597	0.02964	-0.01213	0.1041	1.551	0.1213	0	0.2839	0.3954
4	rs55729020:56357848:C:G	56357848	G	RECxCHS_LP	768	0.04597	0.02964	-0.01213	0.1041	1.551	0.1213	0.0012	0.2843	0.443
4	rs55885973:56346221:C:A	56346221	A	RECxCHS_LP	768	0.04597	0.02964	-0.01213	0.1041	1.551	0.1213	0.0012	0.2843	0.443
4	rs56196624:56366507:T:C	56366507	C	RECxCHS_LP	768	0.04597	0.02964	-0.01213	0.1041	1.551	0.1213	0.0012	0.2843	0.443
4	rs57338268:56351180:G:A	56351180	A	RECxCHS_LP	768	0.04597	0.02964	-0.01213	0.1041	1.551	0.1213	0.0012	0.2843	0.443
4	rs58476959:56362401:A:C	56362401	C	RECxCHS_LP	768	0.04597	0.02964	-0.01213	0.1041	1.551	0.1213	0.0012	0.2843	0.443
4	rs62303686:56293659:G:A	56293659	A	RECxCHS_LP	768	0.04597	0.02964	-0.01213	0.1041	1.551	0.1213	0	0.2845	0.4439
4	rs62303711:56324492:G:C	56324492	C	RECxCHS_LP	768	0.04597	0.02964	-0.01213	0.1041	1.551	0.1213	0	0.2845	0.4439
4	rs62303713:56327743:G:A	56327743	A	RECxCHS_LP	768	0.04597	0.02964	-0.01213	0.1041	1.551	0.1213	0.0012	0.2843	0.443
4	rs62303718:56342937:T:C	56342937	C	RECxCHS_LP	768	0.04597	0.02964	-0.01213	0.1041	1.551	0.1213	0.0012	0.2843	0.443
4	rs62303726:56356582:A:G	56356582	G	RECxCHS_LP	768	0.04597	0.02964	-0.01213	0.1041	1.551	0.1213	0.0012	0.2843	0.443
4	rs62303731:56365834:C:T	56365834	T	RECxCHS_LP	768	0.04597	0.02964	-0.01213	0.1041	1.551	0.1213	0.0012	0.2843	0.443
4	rs62303732:56366035:A:G	56366035	G	RECxCHS_LP	768	0.04597	0.02964	-0.01213	0.1041	1.551	0.1213	0.0012	0.2843	0.443
4	rs62305264:56369135:A:G	56369135	G	RECxCHS_LP	768	0.04597	0.02964	-0.01213	0.1041	1.551	0.1213	0.0012	0.2843	0.443
4	rs62305266:56371283:C:T	56371283	T	RECxCHS_LP	768	0.04597	0.02964	-0.01213	0.1041	1.551	0.1213	0.0012	0.2843	0.443
4	rs62305267:56372979:C:T	56372979	T	RECxCHS_LP	768	0.04597	0.02964	-0.01213	0.1041	1.551	0.1213	0.0012	0.2843	0.443
4	rs62305268:56373158:T:A	56373158	A	RECxCHS_LP	768	0.04597	0.02964	-0.01213	0.1041	1.551	0.1213	0.0012	0.2843	0.443
4	rs62305270:56374009:G:C	56374009	C	RECxCHS_LP	768	0.04597	0.02964	-0.01213	0.1041	1.551	0.1213	0.0012	0.2843	0.443
4	rs62305271:56375882:G:T	56375882	T	RECxCHS_LP	768	0.04597	0.02964	-0.01213	0.1041	1.551	0.1213	0.0012	0.2843	0.443
4	rs6554282:56385979:A:G	56385979	A	RECxCHS_LP	768	0.04597	0.02964	-0.01213	0.1041	1.551	0.1213	0.0012	0.2843	0.443
4	rs6554283:56387220:G:T	56387220	G	RECxCHS_LP	768	0.04597	0.02964	-0.01213	0.1041	1.551	0.1213	0.0012	0.2843	0.443
4	rs6554284:56399899:A:G	56399899	A	RECxCHS_LP	768	0.04597	0.02964	-0.01213	0.1041	1.551	0.1213	0.0012	0.2843	0.443
4	rs6554285:56400120:C:T	56400120	C	RECxCHS_LP	768	0.04597	0.02964	-0.01213	0.1041	1.551	0.1213	0.0012	0.2843	0.443
4	rs6554287:56416879:C:T	56416879	C	RECxCHS_LP	768	0.04597	0.02964	-0.01213	0.1041	1.551	0.1213	0	0.2839	0.3954
4	rs73236142:56312310:G:T	56312310	T	RECxCHS_LP	768	0.04597	0.02964	-0.01213	0.1041	1.551	0.1213	0	0.2845	0.4439
4	rs7660668:56401697:C:G	56401697	C	RECxCHS_LP	768	0.04597	0.02964	-0.01213	0.1041	1.551	0.1213	0.0012	0.2843	0.443
4	rs7666895:56387478:T:C	56387478	T	RECxCHS_LP	768	0.04597	0.02964	-0.01213	0.1041	1.551	0.1213	0.0012	0.2843	0.443
4	rs7676245:56321317:G:A	56321317	A	RECxCHS_LP	768	0.04597	0.02964	-0.01213	0.1041	1.551	0.1213	0	0.2845	0.4439
4	rs7681414:56375057:C:G	56375057	G	RECxCHS_LP	768	0.04597	0.02964	-0.01213	0.1041	1.551	0.1213	0.0012	0.2843	0.443
4	rs7697067:56403380:A:T	56403380	A	RECxCHS_LP	768	0.04597	0.02964	-0.01213	0.1041	1.551	0.1213	0.0012	0.2843	0.443
4	rs7698022:56407347:G:T	56407347	G	RECxCHS_LP	768	0.04597	0.02964	-0.01213	0.1041	1.551	0.1213	0.0012	0.2843	0.443
4	rs1979605:56418873:A:G	56418873	A	RECxCHS_LP	767	0.04597	0.02965	-0.01215	0.1041	1.55	0.1215	0.0012	0.2837	0.3938
4	rs17721497:56311248:A:T	56311248	T	RECxCHS_LP	764	0.04597	0.02969	-0.01223	0.1042	1.548	0.122	0.006002	0.285	0.4426
4	rs79658500:56364754:T:C	56364754	C	RECxCHS_LP	766	0.0459	0.02966	-0.01223	0.104	1.548	0.1221	0.003601	0.2843	0.3947
4	rs67963898:56341687:A:G	56341687	G	RECxCHS_LP	767	0.04588	0.02965	-0.01223	0.104	1.547	0.1222	0.002401	0.284	0.3942
4	rs10529258:56412869:G:A	56412869	A	RECxCHS_LP	757	0.04552	0.02972	-0.01272	0.1038	1.532	0.126	0.01441	0.2801	0.3414
4	rs115635692:56412873:A:C	56412873	C	RECxCHS_LP	757	0.04552	0.02972	-0.01272	0.1038	1.532	0.126	0.01441	0.2801	0.3414
4	rs116135676:56412874:G:T	56412874	T	RECxCHS_LP	757	0.04552	0.02972	-0.01272	0.1038	1.532	0.126	0.01441	0.2801	0.3414
4	rs62305265:56369641:G:A	56369641	A	RECxCHS_LP	767	0.04534	0.02962	-0.01272	0.1034	1.531	0.1263	0.002401	0.284	0.3942
4	rs7659095:56401601:G:A	56401601	G	RECxCHS_LP	766	0.04516	0.02966	-0.01297	0.1033	1.523	0.1283	0.003601	0.2837	0.393
4	rs12651640:56320321:T:A	56320321	A	RECxCHS_LP	767	-0.02703	0.0231	-0.0723	0.01825	-1.17	0.2424	0.0012	0.3582	0.1313
4	rs4864994:56318122:A:C	56318122	C	RECxCHS_LP	762	-0.02697	0.02314	-0.07233	0.0184	-1.165	0.2444	0.008403	0.3596	0.1738
4	rs1056545:56296897:G:A	56296897	A	RECxCHS_LP	763	-0.02656	0.02315	-0.07195	0.01882	-1.147	0.2516	0.006002	0.3593	0.1743
4	rs5863:56296907:A:G	56296907	G	RECxCHS_LP	763	-0.02656	0.02315	-0.07195	0.01882	-1.147	0.2516	0.006002	0.3593	0.1743
4	rs1047354:56295583:A:G	56295583	G	RECxCHS_LP	767	-0.02649	0.02311	-0.07178	0.0188	-1.146	0.2521	0.0012	0.3576	0.1517
4	rs10517346:56323194:G:C	56323194	C	RECxCHS_LP	767	-0.02649	0.02311	-0.07178	0.0188	-1.146	0.2521	0.0012	0.3576	0.1517
4	rs1056547:56296763:T:G	56296763	G	RECxCHS_LP	767	-0.02649	0.02311	-0.07178	0.0188	-1.146	0.2521	0.0012	0.3576	0.1517
4	rs11133378:56305639:C:T	56305639	T	RECxCHS_LP	767	-0.02649	0.02311	-0.07178	0.0188	-1.146	0.2521	0.0012	0.3576	0.1517
4	rs11133380:56307277:A:G	56307277	G	RECxCHS_LP	767	-0.02649	0.02311	-0.07178	0.0188	-1.146	0.2521	0.0012	0.3576	0.1517
4	rs11133381:56316979:T:C	56316979	C	RECxCHS_LP	767	-0.02649	0.02311	-0.07178	0.0188	-1.146	0.2521	0.0012	0.3576	0.1517
4	rs11133384:56323253:C:G	56323253	G	RECxCHS_LP	767	-0.02649	0.02311	-0.07178	0.0188	-1.146	0.2521	0.0012	0.3576	0.1517
4	rs11937487:56302743:A:G	56302743	G	RECxCHS_LP	767	-0.02649	0.02311	-0.07178	0.0188	-1.146	0.2521	0.0012	0.3576	0.1517
4	rs11945370:56309042:A:G	56309042	G	RECxCHS_LP	767	-0.02649	0.02311	-0.07178	0.0188	-1.146	0.2521	0.0012	0.3576	0.1517
4	rs12510110:56307734:A:G	56307734	G	RECxCHS_LP	767	-0.02649	0.02311	-0.07178	0.0188	-1.146	0.2521	0.0012	0.3576	0.1517
4	rs12510990:56308074:T:C	56308074	C	RECxCHS_LP	767	-0.02649	0.02311	-0.07178	0.0188	-1.146	0.2521	0.0012	0.3576	0.1517
4	rs12647677:56310420:T:C	56310420	C	RECxCHS_LP	767	-0.02649	0.02311	-0.07178	0.0188	-1.146	0.2521	0.0012	0.3576	0.1517
4	rs1474271:56302079:C:T	56302079	T	RECxCHS_LP	767	-0.02649	0.02311	-0.07178	0.0188	-1.146	0.2521	0.0012	0.3576	0.1517
4	rs1554483:56321817:C:G	56321817	G	RECxCHS_LP	767	-0.02649	0.02311	-0.07178	0.0188	-1.146	0.2521	0.0012	0.3576	0.1517
4	rs1554484:56324339:T:C	56324339	C	RECxCHS_LP	767	-0.02649	0.02311	-0.07178	0.0188	-1.146	0.2521	0.0012	0.3576	0.1517
4	rs3749474:56300685:C:T	56300685	T	RECxCHS_LP	767	-0.02649	0.02311	-0.07178	0.0188	-1.146	0.2521	0.0012	0.3576	0.1517
4	rs3805146:56303152:C:T	56303152	T	RECxCHS_LP	767	-0.02649	0.02311	-0.07178	0.0188	-1.146	0.2521	0.0012	0.3576	0.1517
4	rs3805148:56306810:A:C	56306810	C	RECxCHS_LP	767	-0.02649	0.02311	-0.07178	0.0188	-1.146	0.2521	0.0012	0.3576	0.1517
4	rs3805149:56308351:C:T	56308351	T	RECxCHS_LP	767	-0.02649	0.02311	-0.07178	0.0188	-1.146	0.2521	0.0012	0.3576	0.1517
4	rs3805150:56313036:C:T	56313036	T	RECxCHS_LP	767	-0.02649	0.02311	-0.07178	0.0188	-1.146	0.2521	0.0012	0.3576	0.1517
4	rs4864990:56313690:A:G	56313690	G	RECxCHS_LP	767	-0.02649	0.02311	-0.07178	0.0188	-1.146	0.2521	0.0012	0.3576	0.1517
4	rs4864995:56319020:A:G	56319020	G	RECxCHS_LP	767	-0.02649	0.02311	-0.07178	0.0188	-1.146	0.2521	0.0012	0.3576	0.1517
4	rs6828570:56297762:C:G	56297762	G	RECxCHS_LP	767	-0.02649	0.02311	-0.07178	0.0188	-1.146	0.2521	0.0012	0.3576	0.1517
4	rs7677952:56291479:C:T	56291479	T	RECxCHS_LP	767	-0.02649	0.02311	-0.07178	0.0188	-1.146	0.2521	0.0012	0.3576	0.1517
4	rs11932880:56398077:C:A	56398077	A	RECxCHS_LP	767	-0.02643	0.02312	-0.07175	0.01889	-1.143	0.2533	0.002401	0.3562	0.1509
4	rs11942279:56305819:T:C	56305819	C	RECxCHS_LP	766	-0.02638	0.02313	-0.07171	0.01894	-1.141	0.2543	0.002401	0.358	0.152
4	rs12506788:56343593:C:T	56343593	T	RECxCHS_LP	766	-0.02624	0.02312	-0.07155	0.01907	-1.135	0.2567	0.004802	0.3577	0.1311
4	rs4864548	56413803	A	RECxCHS_LP	768	-0.02617	0.02309	-0.07143	0.01909	-1.133	0.2574	0	0.3571	0.08248
4	rs12642716:56346163:G:A	56346163	A	RECxCHS_LP	767	-0.02617	0.02311	-0.07146	0.01912	-1.132	0.2578	0.002401	0.3574	0.1511
4	rs13114841:56352141:T:C	56352141	C	RECxCHS_LP	767	-0.02614	0.02311	-0.07144	0.01916	-1.131	0.2584	0.002401	0.3574	0.1511
4	rs10462032:56345236:T:C	56345236	C	RECxCHS_LP	768	-0.02611	0.0231	-0.07138	0.01916	-1.131	0.2586	0.0012	0.357	0.1314
4	rs10517344:56343712:A:C	56343712	C	RECxCHS_LP	768	-0.02611	0.0231	-0.07138	0.01916	-1.131	0.2586	0.0012	0.357	0.1314
4	rs11133386:56327487:A:T	56327487	T	RECxCHS_LP	768	-0.02611	0.0231	-0.07138	0.01916	-1.131	0.2586	0.0012	0.357	0.1314
4	rs11133387:56341297:C:G	56341297	G	RECxCHS_LP	768	-0.02611	0.0231	-0.07138	0.01916	-1.131	0.2586	0.0012	0.357	0.1314
4	rs11133388:56344033:G:C	56344033	C	RECxCHS_LP	768	-0.02611	0.0231	-0.07138	0.01916	-1.131	0.2586	0.0012	0.357	0.1314
4	rs11133390:56367893:A:G	56367893	G	RECxCHS_LP	768	-0.02611	0.0231	-0.07138	0.01916	-1.131	0.2586	0.0012	0.357	0.1314
4	rs11133391:56367955:T:C	56367955	C	RECxCHS_LP	768	-0.02611	0.0231	-0.07138	0.01916	-1.131	0.2586	0.0012	0.357	0.1314
4	rs11133392:56373896:T:A	56373896	A	RECxCHS_LP	768	-0.02611	0.0231	-0.07138	0.01916	-1.131	0.2586	0.0012	0.357	0.1314
4	rs11133395:56383651:C:T	56383651	T	RECxCHS_LP	768	-0.02611	0.0231	-0.07138	0.01916	-1.131	0.2586	0.0012	0.357	0.1314
4	rs11722049:56346901:A:G	56346901	G	RECxCHS_LP	768	-0.02611	0.0231	-0.07138	0.01916	-1.131	0.2586	0.0012	0.357	0.1314
4	rs11724094:56367646:C:A	56367646	A	RECxCHS_LP	768	-0.02611	0.0231	-0.07138	0.01916	-1.131	0.2586	0.0012	0.357	0.1314
4	rs11729220:56367796:T:G	56367796	G	RECxCHS_LP	768	-0.02611	0.0231	-0.07138	0.01916	-1.131	0.2586	0.0012	0.357	0.1314
4	rs11932293:56420192:G:C	56420192	C	RECxCHS_LP	768	-0.02611	0.0231	-0.07138	0.01916	-1.131	0.2586	0	0.3571	0.1129
4	rs11934897:56419563:T:C	56419563	C	RECxCHS_LP	768	-0.02611	0.0231	-0.07138	0.01916	-1.131	0.2586	0	0.3571	0.1129
4	rs12500162:56363100:T:C	56363100	C	RECxCHS_LP	768	-0.02611	0.0231	-0.07138	0.01916	-1.131	0.2586	0.0012	0.357	0.1314
4	rs12501327:56373415:C:G	56373415	G	RECxCHS_LP	768	-0.02611	0.0231	-0.07138	0.01916	-1.131	0.2586	0.0012	0.357	0.1314
4	rs12501636:56348484:T:A	56348484	A	RECxCHS_LP	768	-0.02611	0.0231	-0.07138	0.01916	-1.131	0.2586	0.0012	0.357	0.1314
4	rs12503578:56375534:C:G	56375534	G	RECxCHS_LP	768	-0.02611	0.0231	-0.07138	0.01916	-1.131	0.2586	0.0012	0.357	0.1314
4	rs12505266:56412169:C:T	56412169	T	RECxCHS_LP	768	-0.02611	0.0231	-0.07138	0.01916	-1.131	0.2586	0	0.3571	0.1129
4	rs12510681:56362904:C:T	56362904	T	RECxCHS_LP	768	-0.02611	0.0231	-0.07138	0.01916	-1.131	0.2586	0.0012	0.357	0.1314
4	rs12644948:56336433:C:T	56336433	T	RECxCHS_LP	768	-0.02611	0.0231	-0.07138	0.01916	-1.131	0.2586	0.0012	0.357	0.1314
4	rs13107988:56351378:T:C	56351378	C	RECxCHS_LP	768	-0.02611	0.0231	-0.07138	0.01916	-1.131	0.2586	0.0012	0.357	0.1314
4	rs13108409:56386445:T:C	56386445	C	RECxCHS_LP	768	-0.02611	0.0231	-0.07138	0.01916	-1.131	0.2586	0.0012	0.357	0.1314
4	rs13115828:56417614:T:C	56417614	C	RECxCHS_LP	768	-0.02611	0.0231	-0.07138	0.01916	-1.131	0.2586	0	0.3571	0.1129
4	rs13118237:56340426:T:G	56340426	G	RECxCHS_LP	768	-0.02611	0.0231	-0.07138	0.01916	-1.131	0.2586	0.0012	0.357	0.1314
4	rs13118520:56415283:G:C	56415283	C	RECxCHS_LP	768	-0.02611	0.0231	-0.07138	0.01916	-1.131	0.2586	0	0.3571	0.1129
4	rs13122619:56345506:C:G	56345506	G	RECxCHS_LP	768	-0.02611	0.0231	-0.07138	0.01916	-1.131	0.2586	0.0012	0.357	0.1314
4	rs13127906:56370368:A:G	56370368	G	RECxCHS_LP	768	-0.02611	0.0231	-0.07138	0.01916	-1.131	0.2586	0.0012	0.357	0.1314
4	rs13133484:56370343:T:C	56370343	C	RECxCHS_LP	768	-0.02611	0.0231	-0.07138	0.01916	-1.131	0.2586	0.0012	0.357	0.1314
4	rs13133579:56326088:A:T	56326088	T	RECxCHS_LP	768	-0.02611	0.0231	-0.07138	0.01916	-1.131	0.2586	0.0012	0.357	0.1314
4	rs13136282:56418012:C:G	56418012	G	RECxCHS_LP	768	-0.02611	0.0231	-0.07138	0.01916	-1.131	0.2586	0	0.3571	0.1129
4	rs13146987:56357795:A:G	56357795	G	RECxCHS_LP	768	-0.02611	0.0231	-0.07138	0.01916	-1.131	0.2586	0.0012	0.357	0.1314
4	rs1522112:56329773:T:C	56329773	C	RECxCHS_LP	768	-0.02611	0.0231	-0.07138	0.01916	-1.131	0.2586	0.0012	0.357	0.1314
4	rs3805151:56337041:T:C	56337041	C	RECxCHS_LP	768	-0.02611	0.0231	-0.07138	0.01916	-1.131	0.2586	0.0012	0.357	0.1314
4	rs3805155:56364009:T:C	56364009	C	RECxCHS_LP	768	-0.02611	0.0231	-0.07138	0.01916	-1.131	0.2586	0.0012	0.357	0.1314
4	rs3828480:56376519:T:C	56376519	C	RECxCHS_LP	768	-0.02611	0.0231	-0.07138	0.01916	-1.131	0.2586	0.0012	0.357	0.1314
4	rs3828482:56376691:G:T	56376691	T	RECxCHS_LP	768	-0.02611	0.0231	-0.07138	0.01916	-1.131	0.2586	0.0012	0.357	0.1314
4	rs4340844:56328856:A:C	56328856	C	RECxCHS_LP	768	-0.02611	0.0231	-0.07138	0.01916	-1.131	0.2586	0.0012	0.357	0.1314
4	rs4864542:56354087:C:G	56354087	G	RECxCHS_LP	768	-0.02611	0.0231	-0.07138	0.01916	-1.131	0.2586	0.0012	0.357	0.1314
4	rs4864544:56381459:C:T	56381459	T	RECxCHS_LP	768	-0.02611	0.0231	-0.07138	0.01916	-1.131	0.2586	0.0012	0.357	0.1314
4	rs4864545:56381830:G:A	56381830	A	RECxCHS_LP	768	-0.02611	0.0231	-0.07138	0.01916	-1.131	0.2586	0.0012	0.357	0.1314
4	rs4864549:56420547:G:T	56420547	T	RECxCHS_LP	768	-0.02611	0.0231	-0.07138	0.01916	-1.131	0.2586	0	0.3571	0.1129
4	rs4864997:56332177:C:G	56332177	G	RECxCHS_LP	768	-0.02611	0.0231	-0.07138	0.01916	-1.131	0.2586	0.0012	0.357	0.1314
4	rs4864999:56342903:A:G	56342903	G	RECxCHS_LP	768	-0.02611	0.0231	-0.07138	0.01916	-1.131	0.2586	0.0012	0.357	0.1314
4	rs4865011:56420623:A:G	56420623	G	RECxCHS_LP	768	-0.02611	0.0231	-0.07138	0.01916	-1.131	0.2586	0	0.3571	0.1129
4	rs56154935:56412545:C:G	56412545	G	RECxCHS_LP	768	-0.02611	0.0231	-0.07138	0.01916	-1.131	0.2586	0	0.3571	0.1129
4	rs6822740:56385089:C:G	56385089	G	RECxCHS_LP	768	-0.02611	0.0231	-0.07138	0.01916	-1.131	0.2586	0.0012	0.357	0.1314
4	rs6838305:56374754:C:T	56374754	T	RECxCHS_LP	768	-0.02611	0.0231	-0.07138	0.01916	-1.131	0.2586	0.0012	0.357	0.1314
4	rs6838499:56374828:C:T	56374828	T	RECxCHS_LP	768	-0.02611	0.0231	-0.07138	0.01916	-1.131	0.2586	0.0012	0.357	0.1314
4	rs6838882:56355477:A:G	56355477	G	RECxCHS_LP	768	-0.02611	0.0231	-0.07138	0.01916	-1.131	0.2586	0.0012	0.357	0.1314
4	rs6847529:56384943:A:T	56384943	T	RECxCHS_LP	768	-0.02611	0.0231	-0.07138	0.01916	-1.131	0.2586	0.0012	0.357	0.1314
4	rs6849433:56372665:A:G	56372665	G	RECxCHS_LP	768	-0.02611	0.0231	-0.07138	0.01916	-1.131	0.2586	0.0012	0.357	0.1314
4	rs6858803:56350701:T:C	56350701	C	RECxCHS_LP	768	-0.02611	0.0231	-0.07138	0.01916	-1.131	0.2586	0.0012	0.357	0.1314
4	rs7662966:56414428:G:C	56414428	C	RECxCHS_LP	768	-0.02611	0.0231	-0.07138	0.01916	-1.131	0.2586	0	0.3571	0.1129
4	rs7677085:56361968:C:T	56361968	T	RECxCHS_LP	768	-0.02611	0.0231	-0.07138	0.01916	-1.131	0.2586	0.0012	0.357	0.1314
4	rs7686261:56366391:A:G	56366391	G	RECxCHS_LP	768	-0.02611	0.0231	-0.07138	0.01916	-1.131	0.2586	0.0012	0.357	0.1314
4	rs7691799:56411741:C:A	56411741	A	RECxCHS_LP	768	-0.02611	0.0231	-0.07138	0.01916	-1.131	0.2586	0	0.3571	0.1129
4	rs9312661:56342326:G:A	56342326	A	RECxCHS_LP	768	-0.02611	0.0231	-0.07138	0.01916	-1.131	0.2586	0.0012	0.357	0.1314
4	rs939823:56353535:C:T	56353535	T	RECxCHS_LP	768	-0.02611	0.0231	-0.07138	0.01916	-1.131	0.2586	0.0012	0.357	0.1314
4	rs960152:56333475:A:C	56333475	C	RECxCHS_LP	768	-0.02611	0.0231	-0.07138	0.01916	-1.131	0.2586	0.0012	0.357	0.1314
4	rs11133396:56390413:A:C	56390413	C	RECxCHS_LP	767	-0.0259	0.02311	-0.0712	0.01939	-1.121	0.2627	0.002401	0.3568	0.1305
4	rs11726198:56390002:T:C	56390002	C	RECxCHS_LP	767	-0.0259	0.02311	-0.0712	0.01939	-1.121	0.2627	0.002401	0.3568	0.1305
4	rs12507722:56402588:G:A	56402588	A	RECxCHS_LP	767	-0.0259	0.02311	-0.0712	0.01939	-1.121	0.2627	0.002401	0.3568	0.1305
4	rs13106406:56408486:G:C	56408486	C	RECxCHS_LP	767	-0.0259	0.02311	-0.0712	0.01939	-1.121	0.2627	0.002401	0.3568	0.1305
4	rs13108499:56392681:A:C	56392681	C	RECxCHS_LP	767	-0.0259	0.02311	-0.0712	0.01939	-1.121	0.2627	0.002401	0.3568	0.1305
4	rs13113518:56399648:T:C	56399648	C	RECxCHS_LP	767	-0.0259	0.02311	-0.0712	0.01939	-1.121	0.2627	0.002401	0.3568	0.1305
4	rs13116194:56397317:G:A	56397317	A	RECxCHS_LP	767	-0.0259	0.02311	-0.0712	0.01939	-1.121	0.2627	0.002401	0.3568	0.1305
4	rs13117836:56397385:C:T	56397385	T	RECxCHS_LP	767	-0.0259	0.02311	-0.0712	0.01939	-1.121	0.2627	0.002401	0.3568	0.1305
4	rs13132084:56399912:G:A	56399912	A	RECxCHS_LP	767	-0.0259	0.02311	-0.0712	0.01939	-1.121	0.2627	0.002401	0.3568	0.1305
4	rs13134752:56408511:A:T	56408511	T	RECxCHS_LP	767	-0.0259	0.02311	-0.0712	0.01939	-1.121	0.2627	0.002401	0.3568	0.1305
4	rs13141049:56401656:T:C	56401656	C	RECxCHS_LP	767	-0.0259	0.02311	-0.0712	0.01939	-1.121	0.2627	0.002401	0.3568	0.1305
4	rs13152173:56400955:G:T	56400955	T	RECxCHS_LP	767	-0.0259	0.02311	-0.0712	0.01939	-1.121	0.2627	0.002401	0.3568	0.1305
4	rs34648901:56407426:C:T	56407426	T	RECxCHS_LP	767	-0.0259	0.02311	-0.0712	0.01939	-1.121	0.2627	0.002401	0.3568	0.1305
4	rs4864546:56404127:G:A	56404127	A	RECxCHS_LP	767	-0.0259	0.02311	-0.0712	0.01939	-1.121	0.2627	0.002401	0.3568	0.1305
4	rs4865007:56403717:C:T	56403717	T	RECxCHS_LP	767	-0.0259	0.02311	-0.0712	0.01939	-1.121	0.2627	0.002401	0.3568	0.1305
4	rs7660980:56409115:C:A	56409115	A	RECxCHS_LP	767	-0.0259	0.02311	-0.0712	0.01939	-1.121	0.2627	0.0012	0.3576	0.1131
4	rs7668429:56397978:G:A	56397978	A	RECxCHS_LP	767	-0.0259	0.02311	-0.0712	0.01939	-1.121	0.2627	0.002401	0.3568	0.1305
4	rs7669635:56397820:C:T	56397820	T	RECxCHS_LP	767	-0.0259	0.02311	-0.0712	0.01939	-1.121	0.2627	0.002401	0.3568	0.1305
4	rs7675109:56391756:G:A	56391756	A	RECxCHS_LP	767	-0.0259	0.02311	-0.0712	0.01939	-1.121	0.2627	0.002401	0.3568	0.1305
4	rs7686058:56405164:C:T	56405164	T	RECxCHS_LP	767	-0.0259	0.02311	-0.0712	0.01939	-1.121	0.2627	0.002401	0.3568	0.1305
4	rs7696832:56403247:A:G	56403247	G	RECxCHS_LP	767	-0.0259	0.02311	-0.0712	0.01939	-1.121	0.2627	0.002401	0.3568	0.1305
4	rs4865005:56391948:T:A	56391948	A	RECxCHS_LP	766	-0.02585	0.02312	-0.07118	0.01947	-1.118	0.2639	0.003601	0.3572	0.1307
4	rs11133397:56400333:C:A	56400333	A	RECxCHS_LP	765	-0.02579	0.02318	-0.07123	0.01965	-1.112	0.2663	0.004802	0.3565	0.1503
4	rs11133398:56400347:C:T	56400347	T	RECxCHS_LP	765	-0.02579	0.02318	-0.07123	0.01965	-1.112	0.2663	0.004802	0.3565	0.1503
4	rs4865004:56381285:G:A	56381285	A	RECxCHS_LP	767	-0.02546	0.02298	-0.07049	0.01957	-1.108	0.2682	0.002401	0.3592	0.1133
4	rs4864547:56404395:C:T	56404395	T	RECxCHS_LP	765	-0.0255	0.0231	-0.07078	0.01978	-1.104	0.2701	0.004802	0.3577	0.1311
4	rs530875:56289779:A:G	56289779	A	RECxCHS_LP	768	0.06611	0.06135	-0.05413	0.1863	1.078	0.2815	0.0012	0.1755	0.4717
4	rs532768:56289999:A:G	56289999	A	RECxCHS_LP	768	0.06611	0.06135	-0.05413	0.1863	1.078	0.2815	0.0012	0.1755	0.4717
4	rs534654	56290220	A	RECxCHS_LP	768	0.06611	0.06135	-0.05413	0.1863	1.078	0.2815	0	0.1759	0.4048
4	rs711533:56289379:C:A	56289379	C	RECxCHS_LP	768	0.06611	0.06135	-0.05413	0.1863	1.078	0.2815	0.0012	0.1755	0.4717
4	rs505861:56285166:T:G	56285166	T	RECxCHS_LP	766	0.06618	0.06142	-0.0542	0.1866	1.077	0.2816	0.003601	0.1753	0.4713
4	rs471546:56286613:A:T	56286613	A	RECxCHS_LP	767	0.06612	0.06138	-0.05419	0.1864	1.077	0.2818	0.002401	0.1757	0.4717
4	rs504836:56285305:C:T	56285305	C	RECxCHS_LP	767	0.06612	0.06138	-0.05419	0.1864	1.077	0.2818	0.002401	0.1757	0.4717
4	rs549564:56286717:T:C	56286717	T	RECxCHS_LP	767	0.06612	0.06138	-0.05419	0.1864	1.077	0.2818	0.002401	0.1757	0.4717
4	rs3762837:56377365:T:C	56377365	C	RECxCHS_LP	767	-0.02471	0.02314	-0.07007	0.02064	-1.068	0.2859	0.002401	0.3562	0.1509
4	rs146471976:56293324:C:A	56293324	A	RECxCHS_LP	736	0.1612	0.1517	-0.1361	0.4585	1.063	0.2883	0.04322	0.06336	0.5495
4	rs1464490:56322787:T:C	56322787	C	RECxCHS_LP	766	-0.02434	0.02303	-0.06948	0.0208	-1.057	0.291	0.002401	0.358	0.152
4	rs11133394:56383238:C:T	56383238	C	RECxCHS_LP	732	0.02047	0.02054	-0.01978	0.06072	0.9969	0.3192	0.04682	0.4181	0.08
4	rs6850524:56381997:C:G	56381997	C	RECxCHS_LP	732	0.02047	0.02054	-0.01978	0.06072	0.9969	0.3192	0.04682	0.4181	0.08
4	rs142902983:56406335:C:T	56406335	T	RECxCHS_LP	749	0.05923	0.06326	-0.06476	0.1832	0.9363	0.3494	0.02761	0.1716	0.538
4	rs10462028:56298300:G:A	56298300	A	RECxCHS_LP	768	0.02313	0.02643	-0.02868	0.07494	0.8751	0.3818	0	0.3235	0.476
4	rs57826934:56323379:C:T	56323379	T	RECxCHS_LP	768	0.02313	0.02643	-0.02868	0.07494	0.8751	0.3818	0	0.3235	0.476
4	rs13132420:56392813:G:A	56392813	A	RECxCHS_LP	750	-0.0203	0.02426	-0.06785	0.02724	-0.8369	0.4029	0.02761	0.3414	0.1008
4	rs13140173:56393331:C:T	56393331	T	RECxCHS_LP	761	-0.01991	0.02475	-0.06842	0.02859	-0.8047	0.4212	0.009604	0.3176	0.09137
4	rs4864996:56319088:A:C	56319088	C	RECxCHS_LP	764	-0.01966	0.0247	-0.06808	0.02876	-0.7958	0.4264	0.004802	0.3191	0.09326
4	rs11932712:56302590:C:T	56302590	T	RECxCHS_LP	767	-0.01955	0.02467	-0.06789	0.0288	-0.7924	0.4284	0.0012	0.3185	0.09358
4	rs12512737:56321105:A:T	56321105	T	RECxCHS_LP	767	-0.01955	0.02467	-0.06789	0.0288	-0.7924	0.4284	0.0012	0.3185	0.09358
4	rs13125984:56321269:G:A	56321269	A	RECxCHS_LP	767	-0.01955	0.02467	-0.06789	0.0288	-0.7924	0.4284	0.0012	0.3185	0.09358
4	rs13128180:56286188:G:T	56286188	T	RECxCHS_LP	767	-0.01955	0.02467	-0.06789	0.0288	-0.7924	0.4284	0.0012	0.3185	0.09358
4	rs2412648:56321067:T:G	56321067	G	RECxCHS_LP	767	-0.01955	0.02467	-0.06789	0.0288	-0.7924	0.4284	0.0012	0.3185	0.09358
4	rs6849474:56318462:G:A	56318462	A	RECxCHS_LP	765	-0.01952	0.02468	-0.0679	0.02886	-0.7909	0.4292	0.003601	0.3187	0.09305
4	rs12501746:56303605:C:T	56303605	T	RECxCHS_LP	766	-0.0195	0.02468	-0.06788	0.02887	-0.7903	0.4296	0.002401	0.3183	0.09293
4	rs1522114:56356062:A:G	56356062	G	RECxCHS_LP	762	-0.01935	0.02473	-0.06783	0.02912	-0.7824	0.4342	0.008403	0.3184	0.1086
4	rs4864543:56356395:C:T	56356395	T	RECxCHS_LP	762	-0.01935	0.02473	-0.06783	0.02912	-0.7824	0.4342	0.008403	0.3184	0.1086
4	rs4865001:56356343:T:C	56356343	C	RECxCHS_LP	762	-0.01935	0.02473	-0.06783	0.02912	-0.7824	0.4342	0.008403	0.3184	0.1086
4	rs6825774:56357317:G:T	56357317	T	RECxCHS_LP	762	-0.01935	0.02473	-0.06783	0.02912	-0.7824	0.4342	0.008403	0.3184	0.1086
4	rs11133389:56352885:C:T	56352885	T	RECxCHS_LP	766	-0.01929	0.02469	-0.06767	0.02909	-0.7814	0.4348	0.003601	0.3169	0.09214
4	rs11939580:56383352:C:T	56383352	T	RECxCHS_LP	766	-0.01929	0.02469	-0.06767	0.02909	-0.7814	0.4348	0.003601	0.3169	0.09214
4	rs12508367:56375609:T:C	56375609	C	RECxCHS_LP	766	-0.01929	0.02469	-0.06767	0.02909	-0.7814	0.4348	0.003601	0.3169	0.09214
4	rs12510275:56382715:T:C	56382715	C	RECxCHS_LP	766	-0.01929	0.02469	-0.06767	0.02909	-0.7814	0.4348	0.003601	0.3169	0.09214
4	rs12510327:56382911:T:C	56382911	C	RECxCHS_LP	766	-0.01929	0.02469	-0.06767	0.02909	-0.7814	0.4348	0.003601	0.3169	0.09214
4	rs12649507:56380484:G:A	56380484	A	RECxCHS_LP	766	-0.01929	0.02469	-0.06767	0.02909	-0.7814	0.4348	0.003601	0.3169	0.09214
4	rs13124436:56368671:G:A	56368671	A	RECxCHS_LP	766	-0.01929	0.02469	-0.06767	0.02909	-0.7814	0.4348	0.003601	0.3169	0.09214
4	rs13128179:56358887:C:T	56358887	T	RECxCHS_LP	766	-0.01929	0.02469	-0.06767	0.02909	-0.7814	0.4348	0.003601	0.3169	0.09214
4	rs13140590:56414833:A:G	56414833	G	RECxCHS_LP	766	-0.01929	0.02469	-0.06767	0.02909	-0.7814	0.4348	0.002401	0.3171	0.06585
4	rs2272073:56376344:C:T	56376344	T	RECxCHS_LP	766	-0.01929	0.02469	-0.06767	0.02909	-0.7814	0.4348	0.003601	0.3169	0.09214
4	rs3805153:56359724:T:G	56359724	G	RECxCHS_LP	766	-0.01929	0.02469	-0.06767	0.02909	-0.7814	0.4348	0.003601	0.3169	0.09214
4	rs4865003:56380969:T:G	56380969	G	RECxCHS_LP	766	-0.01929	0.02469	-0.06767	0.02909	-0.7814	0.4348	0.003601	0.3169	0.09214
4	rs6830409:56388396:T:C	56388396	C	RECxCHS_LP	766	-0.01929	0.02469	-0.06767	0.02909	-0.7814	0.4348	0.003601	0.3169	0.09214
4	rs6843997:56375149:C:T	56375149	T	RECxCHS_LP	766	-0.01929	0.02469	-0.06767	0.02909	-0.7814	0.4348	0.003601	0.3169	0.09214
4	rs7658446:56361429:T:C	56361429	C	RECxCHS_LP	766	-0.01929	0.02469	-0.06767	0.02909	-0.7814	0.4348	0.003601	0.3169	0.09214
4	rs7699867:56349885:C:A	56349885	A	RECxCHS_LP	766	-0.01929	0.02469	-0.06767	0.02909	-0.7814	0.4348	0.003601	0.3169	0.09214
4	rs11133385:56326652:G:A	56326652	A	RECxCHS_LP	768	-0.01921	0.02466	-0.06753	0.02912	-0.779	0.4362	0.0012	0.3179	0.07921
4	rs13115570:56387392:T:G	56387392	G	RECxCHS_LP	764	-0.01924	0.0247	-0.06765	0.02917	-0.7791	0.4362	0.006002	0.3164	0.07721
4	rs11939652:56398709:T:A	56398709	A	RECxCHS_LP	765	-0.01907	0.0247	-0.06748	0.02933	-0.7722	0.4402	0.004802	0.3166	0.09161
4	rs13107810:56408410:C:A	56408410	A	RECxCHS_LP	765	-0.01907	0.0247	-0.06748	0.02933	-0.7722	0.4402	0.004802	0.3166	0.09161
4	rs2035691:56395953:C:T	56395953	T	RECxCHS_LP	765	-0.01907	0.0247	-0.06748	0.02933	-0.7722	0.4402	0.004802	0.3166	0.09161
4	rs2035692:56394968:T:A	56394968	A	RECxCHS_LP	765	-0.01907	0.0247	-0.06748	0.02933	-0.7722	0.4402	0.004802	0.3166	0.09161
4	rs4507426:56395554:T:C	56395554	C	RECxCHS_LP	765	-0.01907	0.0247	-0.06748	0.02933	-0.7722	0.4402	0.004802	0.3166	0.09161
4	rs7667741:56410788:T:C	56410788	C	RECxCHS_LP	765	-0.01907	0.0247	-0.06748	0.02933	-0.7722	0.4402	0.003601	0.3175	0.07776
4	rs6843722:56331332:A:C	56331332	C	RECxCHS_LP	761	-0.01805	0.02471	-0.06648	0.03037	-0.7307	0.4652	0.009604	0.32	0.09322
4	rs55699500:56407079:G:T	56407079	T	RECxCHS_LP	762	-0.01584	0.02424	-0.06336	0.03167	-0.6536	0.5136	0.008403	0.3529	0.2229
4	rs56362210:56407139:C:T	56407139	T	RECxCHS_LP	762	-0.01584	0.02424	-0.06336	0.03167	-0.6536	0.5136	0.008403	0.3529	0.2229
4	rs11133382:56316980:T:G	56316980	T	RECxCHS_LP	763	0.008564	0.02375	-0.03799	0.05512	0.3605	0.7186	0.006002	0.3569	0.01898
4	rs28448438:56416665:C:T	56416665	T	RECxCHS_LP	767	0.008081	0.0231	-0.03718	0.05335	0.3499	0.7265	0.0012	0.3594	0.013
4	rs12648271:56368122:G:C	56368122	C	RECxCHS_LP	759	-0.007726	0.02927	-0.06509	0.04964	-0.264	0.7919	0.012	0.2849	0.3045
4	rs12504300:56348527:G:C	56348527	C	RECxCHS_LP	765	-0.007388	0.0292	-0.06462	0.04984	-0.253	0.8003	0.004802	0.2859	0.3071
4	rs11735267:56347287:C:T	56347287	C	RECxCHS_LP	763	0.005634	0.02315	-0.03974	0.051	0.2434	0.8078	0.007203	0.3609	0.03467
4	rs56055342:56407095:T:C	56407095	C	RECxCHS_LP	760	-0.005958	0.0262	-0.05731	0.04539	-0.2274	0.8202	0.0108	0.3125	0.1684
4	rs11133383:56317045:C:T	56317045	C	RECxCHS_LP	760	0.005011	0.02328	-0.04062	0.05064	0.2153	0.8296	0.009604	0.3624	0.01289
4	rs6851838:56420747:A:C	56420747	C	RECxCHS_LP	767	0.004961	0.02313	-0.04038	0.0503	0.2145	0.8302	0.0012	0.3594	0.01964
4	rs10034433:56421176:A:T	56421176	T	RECxCHS_LP	768	0.004924	0.02312	-0.04039	0.05024	0.213	0.8314	0	0.3589	0.01954
4	rs11133399:56413831:A:G	56413831	G	RECxCHS_LP	768	0.004924	0.02312	-0.04039	0.05024	0.213	0.8314	0	0.3589	0.01954
4	rs28463765:56412434:C:T	56412434	T	RECxCHS_LP	768	0.004924	0.02312	-0.04039	0.05024	0.213	0.8314	0	0.3589	0.01954
4	rs4865010:56414962:A:C	56414962	C	RECxCHS_LP	768	0.004924	0.02312	-0.04039	0.05024	0.213	0.8314	0	0.3589	0.01954
4	rs726967	56421713	A	RECxCHS_LP	768	0.004924	0.02312	-0.04039	0.05024	0.213	0.8314	0	0.3589	0.01954
4	rs10002541:56395011:T:C	56395011	C	RECxCHS_LP	767	0.003531	0.02321	-0.04196	0.04902	0.1521	0.8791	0.0012	0.3582	0.02357
4	rs10005989:56405206:C:T	56405206	T	RECxCHS_LP	767	0.003531	0.02321	-0.04196	0.04902	0.1521	0.8791	0.0012	0.3582	0.02357
4	rs11726609:56400869:T:A	56400869	A	RECxCHS_LP	767	0.003531	0.02321	-0.04196	0.04902	0.1521	0.8791	0.0012	0.3582	0.02357
4	rs17085889:56402115:G:A	56402115	A	RECxCHS_LP	767	0.003531	0.02321	-0.04196	0.04902	0.1521	0.8791	0.0012	0.3582	0.02357
4	rs28525309:56406236:G:C	56406236	C	RECxCHS_LP	767	0.003531	0.02321	-0.04196	0.04902	0.1521	0.8791	0.0012	0.3582	0.02357
4	rs28582059:56408404:G:C	56408404	C	RECxCHS_LP	767	0.003531	0.02321	-0.04196	0.04902	0.1521	0.8791	0.0012	0.3582	0.02357
4	rs28790098:56398109:C:T	56398109	T	RECxCHS_LP	767	0.003531	0.02321	-0.04196	0.04902	0.1521	0.8791	0.0012	0.3582	0.02357
4	rs4865008:56410855:T:G	56410855	G	RECxCHS_LP	767	0.003531	0.02321	-0.04196	0.04902	0.1521	0.8791	0.0012	0.3582	0.02357
4	rs62309727:56391793:G:A	56391793	A	RECxCHS_LP	767	0.003531	0.02321	-0.04196	0.04902	0.1521	0.8791	0.0012	0.3582	0.02357
4	rs6812042:56396079:G:T	56396079	T	RECxCHS_LP	767	0.003531	0.02321	-0.04196	0.04902	0.1521	0.8791	0.0012	0.3582	0.02357
4	rs6815516:56399184:A:T	56399184	T	RECxCHS_LP	767	0.003531	0.02321	-0.04196	0.04902	0.1521	0.8791	0.0012	0.3582	0.02357
4	rs6839788:56393040:G:T	56393040	T	RECxCHS_LP	767	0.003531	0.02321	-0.04196	0.04902	0.1521	0.8791	0.0012	0.3582	0.02357
4	rs7673908:56394819:A:G	56394819	G	RECxCHS_LP	767	0.003531	0.02321	-0.04196	0.04902	0.1521	0.8791	0.0012	0.3582	0.02357
4	rs9998038:56397849:C:T	56397849	T	RECxCHS_LP	767	0.003531	0.02321	-0.04196	0.04902	0.1521	0.8791	0.0012	0.3582	0.02357
4	rs9998146:56397977:C:T	56397977	T	RECxCHS_LP	767	0.003531	0.02321	-0.04196	0.04902	0.1521	0.8791	0.0012	0.3582	0.02357
4	rs10462035:56379178:G:A	56379178	G	RECxCHS_LP	768	0.003326	0.0232	-0.04214	0.04879	0.1434	0.886	0	0.3583	0.02387
4	rs11931061	56338793	G	RECxCHS_LP	768	0.003326	0.0232	-0.04214	0.04879	0.1434	0.886	0	0.3583	0.02387
4	rs11939815:56358283:T:G	56358283	T	RECxCHS_LP	768	0.003326	0.0232	-0.04214	0.04879	0.1434	0.886	0	0.3583	0.02387
4	rs11947476:56339751:T:C	56339751	T	RECxCHS_LP	768	0.003326	0.0232	-0.04214	0.04879	0.1434	0.886	0	0.3583	0.02387
4	rs11947623:56349190:C:A	56349190	C	RECxCHS_LP	768	0.003326	0.0232	-0.04214	0.04879	0.1434	0.886	0	0.3583	0.02387
4	rs12646078:56368204:T:C	56368204	T	RECxCHS_LP	768	0.003326	0.0232	-0.04214	0.04879	0.1434	0.886	0	0.3583	0.02387
4	rs13102385:56345255:T:C	56345255	T	RECxCHS_LP	768	0.003326	0.0232	-0.04214	0.04879	0.1434	0.886	0	0.3583	0.02387
4	rs13128582:56328944:C:G	56328944	C	RECxCHS_LP	768	0.003326	0.0232	-0.04214	0.04879	0.1434	0.886	0	0.3583	0.02387
4	rs13138697:56363309:G:A	56363309	G	RECxCHS_LP	768	0.003326	0.0232	-0.04214	0.04879	0.1434	0.886	0	0.3583	0.02387
4	rs13152650:56357858:T:C	56357858	T	RECxCHS_LP	768	0.003326	0.0232	-0.04214	0.04879	0.1434	0.886	0	0.3583	0.02387
4	rs1522110:56380283:C:T	56380283	C	RECxCHS_LP	768	0.003326	0.0232	-0.04214	0.04879	0.1434	0.886	0	0.3583	0.02387
4	rs1522111:56329563:T:A	56329563	T	RECxCHS_LP	768	0.003326	0.0232	-0.04214	0.04879	0.1434	0.886	0	0.3583	0.02387
4	rs1980273:56367401:C:G	56367401	C	RECxCHS_LP	768	0.003326	0.0232	-0.04214	0.04879	0.1434	0.886	0	0.3583	0.02387
4	rs2140077:56338953:A:G	56338953	A	RECxCHS_LP	768	0.003326	0.0232	-0.04214	0.04879	0.1434	0.886	0	0.3583	0.02387
4	rs2177127:56379959:A:C	56379959	A	RECxCHS_LP	768	0.003326	0.0232	-0.04214	0.04879	0.1434	0.886	0	0.3583	0.02387
4	rs2177129:56365414:C:T	56365414	C	RECxCHS_LP	768	0.003326	0.0232	-0.04214	0.04879	0.1434	0.886	0	0.3583	0.02387
4	rs35767091:56346723:G:A	56346723	G	RECxCHS_LP	768	0.003326	0.0232	-0.04214	0.04879	0.1434	0.886	0	0.3583	0.02387
4	rs3805152:56359658:C:T	56359658	C	RECxCHS_LP	768	0.003326	0.0232	-0.04214	0.04879	0.1434	0.886	0	0.3583	0.02387
4	rs3805154:56363927:C:T	56363927	C	RECxCHS_LP	768	0.003326	0.0232	-0.04214	0.04879	0.1434	0.886	0	0.3583	0.02387
4	rs3805157:56364103:A:G	56364103	A	RECxCHS_LP	768	0.003326	0.0232	-0.04214	0.04879	0.1434	0.886	0	0.3583	0.02387
4	rs3828481:56376664:T:C	56376664	T	RECxCHS_LP	768	0.003326	0.0232	-0.04214	0.04879	0.1434	0.886	0	0.3583	0.02387
4	rs4371676:56329008:G:A	56329008	G	RECxCHS_LP	768	0.003326	0.0232	-0.04214	0.04879	0.1434	0.886	0	0.3583	0.02387
4	rs4580704:56326707:G:C	56326707	G	RECxCHS_LP	768	0.003326	0.0232	-0.04214	0.04879	0.1434	0.886	0	0.3583	0.02387
4	rs4864998:56332606:A:G	56332606	A	RECxCHS_LP	768	0.003326	0.0232	-0.04214	0.04879	0.1434	0.886	0	0.3583	0.02387
4	rs58894703:56358538:G:A	56358538	G	RECxCHS_LP	768	0.003326	0.0232	-0.04214	0.04879	0.1434	0.886	0	0.3583	0.02387
4	rs62303714:56329018:A:T	56329018	A	RECxCHS_LP	768	0.003326	0.0232	-0.04214	0.04879	0.1434	0.886	0	0.3583	0.02387
4	rs6810948:56351192:A:G	56351192	A	RECxCHS_LP	768	0.003326	0.0232	-0.04214	0.04879	0.1434	0.886	0	0.3583	0.02387
4	rs6817267:56338541:G:A	56338541	G	RECxCHS_LP	768	0.003326	0.0232	-0.04214	0.04879	0.1434	0.886	0	0.3583	0.02387
4	rs6819660:56374577:T:G	56374577	T	RECxCHS_LP	768	0.003326	0.0232	-0.04214	0.04879	0.1434	0.886	0	0.3583	0.02387
4	rs6824057:56367278:G:C	56367278	G	RECxCHS_LP	768	0.003326	0.0232	-0.04214	0.04879	0.1434	0.886	0	0.3583	0.02387
4	rs6837710:56374455:C:T	56374455	C	RECxCHS_LP	768	0.003326	0.0232	-0.04214	0.04879	0.1434	0.886	0	0.3583	0.02387
4	rs6846427:56335448:C:G	56335448	C	RECxCHS_LP	768	0.003326	0.0232	-0.04214	0.04879	0.1434	0.886	0	0.3583	0.02387
4	rs7667849:56388199:A:G	56388199	G	RECxCHS_LP	768	0.003326	0.0232	-0.04214	0.04879	0.1434	0.886	0	0.3583	0.02387
4	rs7668147:56339384:C:T	56339384	C	RECxCHS_LP	768	0.003326	0.0232	-0.04214	0.04879	0.1434	0.886	0	0.3583	0.02387
4	rs7670225:56368018:C:T	56368018	C	RECxCHS_LP	768	0.003326	0.0232	-0.04214	0.04879	0.1434	0.886	0	0.3583	0.02387
4	rs7677526:56349908:A:T	56349908	A	RECxCHS_LP	768	0.003326	0.0232	-0.04214	0.04879	0.1434	0.886	0	0.3583	0.02387
4	rs7684810:56352794:C:T	56352794	C	RECxCHS_LP	768	0.003326	0.0232	-0.04214	0.04879	0.1434	0.886	0	0.3583	0.02387
4	rs9312662:56386371:T:C	56386371	C	RECxCHS_LP	768	0.003326	0.0232	-0.04214	0.04879	0.1434	0.886	0	0.3583	0.02387
4	rs9997288:56347227:T:C	56347227	T	RECxCHS_LP	768	0.003326	0.0232	-0.04214	0.04879	0.1434	0.886	0	0.3583	0.02387
4	rs10016506:56396674:G:T	56396674	T	RECxCHS_LP	766	0.003101	0.0232	-0.04238	0.04858	0.1336	0.8937	0.002401	0.3586	0.02364
4	rs6853192:56409254:T:A	56409254	A	RECxCHS_LP	766	0.003037	0.0232	-0.04242	0.0485	0.1309	0.8959	0.003601	0.3596	0.02881
4	rs473005:56288125:A:C	56288125	A	RECxCHS_LP	766	0.003019	0.02323	-0.0425	0.04854	0.13	0.8966	0.002401	0.358	0.01942
4	rs564762:56284631:C:T	56284631	C	RECxCHS_LP	766	0.003019	0.02323	-0.0425	0.04854	0.13	0.8966	0.002401	0.358	0.01942
4	rs1965467:56322740:G:A	56322740	G	RECxCHS_LP	765	0.003006	0.02323	-0.04253	0.04854	0.1294	0.8971	0.003601	0.3602	0.03483
4	rs11133379:56306111:G:A	56306111	G	RECxCHS_LP	767	0.003	0.02321	-0.04249	0.04849	0.1293	0.8972	0.0012	0.3582	0.02357
4	rs11733864:56321530:C:T	56321530	C	RECxCHS_LP	767	0.003	0.02321	-0.04249	0.04849	0.1293	0.8972	0.0012	0.3582	0.02357
4	rs12643926:56310621:C:T	56310621	C	RECxCHS_LP	767	0.003	0.02321	-0.04249	0.04849	0.1293	0.8972	0.0012	0.3582	0.02357
4	rs12647034:56310622:A:G	56310622	A	RECxCHS_LP	767	0.003	0.02321	-0.04249	0.04849	0.1293	0.8972	0.0012	0.3582	0.02357
4	rs13121235:56311947:A:G	56311947	A	RECxCHS_LP	767	0.003	0.02321	-0.04249	0.04849	0.1293	0.8972	0.0012	0.3582	0.02357
4	rs1522106:56307214:C:A	56307214	C	RECxCHS_LP	767	0.003	0.02321	-0.04249	0.04849	0.1293	0.8972	0.0012	0.3582	0.02357
4	rs2412646:56318772:T:C	56318772	T	RECxCHS_LP	767	0.003	0.02321	-0.04249	0.04849	0.1293	0.8972	0.0012	0.3582	0.02357
4	rs2412647:56319105:C:T	56319105	C	RECxCHS_LP	767	0.003	0.02321	-0.04249	0.04849	0.1293	0.8972	0.0012	0.3582	0.02357
4	rs3736544:56309992:A:G	56309992	A	RECxCHS_LP	767	0.003	0.02321	-0.04249	0.04849	0.1293	0.8972	0.0012	0.3582	0.02357
4	rs3736545:56310343:C:G	56310343	C	RECxCHS_LP	767	0.003	0.02321	-0.04249	0.04849	0.1293	0.8972	0.0012	0.3582	0.02357
4	rs3805147:56306730:C:T	56306730	C	RECxCHS_LP	767	0.003	0.02321	-0.04249	0.04849	0.1293	0.8972	0.0012	0.3582	0.02357
4	rs6811520:56315178:T:C	56315178	T	RECxCHS_LP	767	0.003	0.02321	-0.04249	0.04849	0.1293	0.8972	0.0012	0.3582	0.02357
4	rs3817444	56375981	A	RECxCHS_LP	768	0.002946	0.0232	-0.04253	0.04842	0.127	0.899	0	0.3577	0.03457
4	rs6554286:56400304:T:G	56400304	G	RECxCHS_LP	765	0.002712	0.02327	-0.04289	0.04831	0.1166	0.9072	0.003601	0.3578	0.02839
4	rs6824955:56317136:T:G	56317136	T	RECxCHS_LP	764	0.002558	0.02322	-0.04295	0.04807	0.1101	0.9123	0.004802	0.3583	0.0192
4	rs28670674:56407103:G:A	56407103	A	RECxCHS_LP	762	0.002372	0.02325	-0.04319	0.04793	0.102	0.9187	0.007203	0.3609	0.03467
4	rs6825994:56390411:C:A	56390411	A	RECxCHS_LP	751	0.002203	0.02299	-0.04286	0.04727	0.0958	0.9237	0.02041	0.3585	0.01482
4	rs1522107:56380773:A:T	56380773	A	RECxCHS_LP	764	0.001913	0.0234	-0.04396	0.04778	0.08173	0.9349	0.004802	0.3565	0.02807
4	rs1522108:56380733:T:C	56380733	T	RECxCHS_LP	764	0.001913	0.0234	-0.04396	0.04778	0.08173	0.9349	0.004802	0.3565	0.02807
4	rs60797008:56388672:A:T	56388672	T	RECxCHS_LP	755	-0.001553	0.02333	-0.04728	0.04418	-0.06658	0.9469	0.01921	0.3599	0.02263
4	rs6832769:56298194:G:A	56298194	G	RECxCHS_LP	761	0.001088	0.02347	-0.04491	0.04709	0.04635	0.963	0.008403	0.3571	0.02794
4	rs6554280:56374952:A:G	56374952	A	RECxCHS_LP	765	0.0009795	0.02341	-0.04491	0.04687	0.04184	0.9666	0.003601	0.3566	0.0285
4	rs6834676:56298414:C:G	56298414	C	RECxCHS_LP	765	-4.95e-05	0.02305	-0.04524	0.04514	-0.002146	0.9983	0.003601	0.3614	0.0131
